# Supplementary material
Source: publisher site journal article supplement (https://www.spandidos-publications.com/3515/downloadSupplementary)
Supplement: Supplementary file 1 [file downloadSupplementary]

## Sheet: diffall.anno
Table SI. List of dysregulated genes in microarray analysis.
ProbeSet ID	FDR	P-value	Fold Change	logFC	absolute FC	Regulation	Entrez Gene	Gene Symbol	Gene Title	Gene Ontology Biological Process	Gene Ontology Cellular Component	Gene Ontology Molecular Function	Pathway	Alignments
11754545_x_at	2.76294e-09	1.14808e-13	2.50388	1.32417	2.50388	up	5327	PLAT	plasminogen activator, tissue	0001666 // response to hypoxia // inferred from electronic annotation /// 0006464 // cellular protein modification process // traceable author statement /// 0006508 // proteolysis // traceable author statement /// 0007596 // blood coagulation // traceable author statement /// 0014909 // smooth muscle cell migration // not recorded /// 0031639 // plasminogen activation // inferred from direct assa…	0005576 // extracellular region // traceable author statement /// 0005615 // extracellular space // not recorded /// 0005737 // cytoplasm // inferred from direct assay /// 0009986 // cell surface // inferred from direct assay /// 0030141 // secretory granule // inferred from electronic annotation /// 0031012 // extracellular matrix // inferred from direct assay /// 0045177 // apical part of cell …	0001948 // glycoprotein binding // traceable author statement /// 0004252 // serine-type endopeptidase activity // inferred from direct assay /// 0004252 // serine-type endopeptidase activity // traceable author statement /// 0005102 // receptor binding // inferred from physical interaction /// 0005515 // protein binding // inferred from physical interaction /// 0008233 // peptidase activity // i…	Blood_Clotting_Cascade // GenMAPP	chr8:42032750-42065092 (-) // 97.4 // p11.21
11716631_s_at	2.76294e-09	1.28789e-13	3.08595	1.62571	3.08595	up	5055	SERPINB2	serpin peptidase inhibitor, clade B (ovalbumin), member 2	0007596 // blood coagulation // traceable author statement /// 0010466 // negative regulation of peptidase activity // inferred from electronic annotation /// 0010951 // negative regulation of endopeptidase activity // not recorded /// 0042060 // wound healing // inferred from electronic annotation /// 0042730 // fibrinolysis // traceable author statement /// 0043066 // negative regulation of apo…	0005576 // extracellular region // traceable author statement /// 0005615 // extracellular space // not recorded /// 0005737 // cytoplasm // inferred from electronic annotation /// 0005886 // plasma membrane // traceable author statement	0004867 // serine-type endopeptidase inhibitor activity // not recorded /// 0030414 // peptidase inhibitor activity // inferred from electronic annotation	Blood_Clotting_Cascade // GenMAPP	chr18:61554938-61571124 (+) // 87.96 // q21.33
11763704_a_at	2.76294e-09	2.03364e-13	2.08755	1.06181	2.08755	up	6303	SAT1	spermidine/spermine N1-acetyltransferase 1	0001525 // angiogenesis // inferred from expression pattern /// 0006595 // polyamine metabolic process // traceable author statement /// 0006596 // polyamine biosynthetic process // traceable author statement /// 0008152 // metabolic process // inferred from electronic annotation /// 0009447 // putrescine catabolic process // inferred from electronic annotation /// 0034641 // cellular nitrogen co…	0005622 // intracellular // inferred from direct assay /// 0005737 // cytoplasm // inferred from electronic annotation /// 0005829 // cytosol // traceable author statement	0004145 // diamine N-acetyltransferase activity // inferred from electronic annotation /// 0005515 // protein binding // inferred from physical interaction /// 0008080 // N-acetyltransferase activity // inferred from electronic annotation /// 0016740 // transferase activity // inferred from electronic annotation /// 0016746 // transferase activity, transferring acyl groups // inferred from electr…	Nucleotide_Metabolism // GenMAPP	chrX:23801289-23804302 (+) // 97.13 // p22.11
11759644_at	2.76294e-09	2.25003e-13	2.20187	1.13873	2.20187	up	9180	OSMR	oncostatin M receptor	0002675 // positive regulation of acute inflammatory response // inferred by curator /// 0008284 // positive regulation of cell proliferation // inferred from genetic interaction /// 0019221 // cytokine-mediated signaling pathway // inferred from electronic annotation /// 0034097 // response to cytokine // inferred from direct assay /// 0038165 // oncostatin-M-mediated signaling pathway // inferr…	0005900 // oncostatin-M receptor complex // inferred from direct assay /// 0016020 // membrane // inferred from electronic annotation /// 0016021 // integral component of membrane // inferred from electronic annotation /// 0016324 // apical plasma membrane // inferred from direct assay	0004896 // cytokine receptor activity // inferred from electronic annotation /// 0004924 // oncostatin-M receptor activity // inferred from direct assay /// 0005515 // protein binding // inferred from electronic annotation /// 0019838 // growth factor binding // inferred from physical interaction	---	chr5:38845959-38886840 (+) // 81.7 // p13.1
11756105_a_at	2.76294e-09	2.79679e-13	-1.94328	-0.958497	1.94328	down	659	BMPR2	bone morphogenetic protein receptor type II	0001707 // mesoderm formation // inferred from sequence or structural similarity /// 0001893 // maternal placenta development // inferred from electronic annotation /// 0001935 // endothelial cell proliferation // inferred from mutant phenotype /// 0001938 // positive regulation of endothelial cell proliferation // inferred from mutant phenotype /// 0001946 // lymphangiogenesis // inferred from s…	0005615 // extracellular space // inferred from direct assay /// 0005737 // cytoplasm // inferred from electronic annotation /// 0005886 // plasma membrane // inferred from direct assay /// 0005886 // plasma membrane // traceable author statement /// 0005887 // integral component of plasma membrane // inferred from direct assay /// 0005901 // caveola // inferred from mutant phenotype /// 0009925 …	0000166 // nucleotide binding // inferred from electronic annotation /// 0004672 // protein kinase activity // inferred from electronic annotation /// 0004674 // protein serine/threonine kinase activity // inferred from electronic annotation /// 0004675 // transmembrane receptor protein serine/threonine kinase activity // inferred from electronic annotation /// 0004702 // receptor signaling prote…	---	chr2:203429462-203432470 (+) // 81.94 // q33.2
11715659_s_at	2.91056e-09	3.53545e-13	1.58665	0.665982	1.58665	up	54206	ERRFI1	ERBB receptor feedback inhibitor 1	0006950 // response to stress // traceable author statement /// 0007175 // negative regulation of epidermal growth factor-activated receptor activity // inferred from direct assay /// 0007175 // negative regulation of epidermal growth factor-activated receptor activity // inferred from sequence or structural similarity /// 0031953 // negative regulation of protein autophosphorylation // inferred …	0005634 // nucleus // inferred from electronic annotation /// 0005737 // cytoplasm // inferred from direct assay /// 0005737 // cytoplasm // inferred from sequence or structural similarity /// 0005829 // cytosol // inferred from electronic annotation /// 0005886 // plasma membrane // inferred from electronic annotation /// 0016020 // membrane // inferred from electronic annotation /// 0031234 // …	0005096 // GTPase activator activity // traceable author statement /// 0005515 // protein binding // inferred from physical interaction /// 0017124 // SH3 domain binding // inferred from electronic annotation /// 0019900 // kinase binding // inferred from electronic annotation /// 0019901 // protein kinase binding // inferred from physical interaction /// 0031267 // small GTPase binding // inferr…	---	chr1:8071778-8086419 (-) // 98.46 // p36.23
11743062_a_at	2.98228e-09	4.22633e-13	1.93488	0.952248	1.93488	up	5329	PLAUR	plasminogen activator, urokinase receptor	0001934 // positive regulation of protein phosphorylation // inferred from mutant phenotype /// 0006501 // C-terminal protein lipidation // traceable author statement /// 0006928 // movement of cell or subcellular component // non-traceable author statement /// 0006935 // chemotaxis // traceable author statement /// 0007165 // signal transduction // traceable author statement /// 0007596 // blood…	0005576 // extracellular region // inferred from electronic annotation /// 0005788 // endoplasmic reticulum lumen // traceable author statement /// 0005789 // endoplasmic reticulum membrane // traceable author statement /// 0005886 // plasma membrane // inferred from direct assay /// 0005886 // plasma membrane // traceable author statement /// 0005887 // integral component of plasma membrane // i…	0004872 // receptor activity // non-traceable author statement /// 0005102 // receptor binding // inferred from physical interaction /// 0005515 // protein binding // inferred from physical interaction /// 0019899 // enzyme binding // inferred from physical interaction /// 0019904 // protein domain specific binding // inferred from physical interaction /// 0030377 // urokinase plasminogen activat…	---	chr19:44152727-44174502 (-) // 84.08 // q13.31
11738053_x_at	3.04225e-09	4.92721e-13	1.85329	0.890085	1.85329	up	5329	PLAUR	plasminogen activator, urokinase receptor	0001934 // positive regulation of protein phosphorylation // inferred from mutant phenotype /// 0006501 // C-terminal protein lipidation // traceable author statement /// 0006928 // movement of cell or subcellular component // non-traceable author statement /// 0006935 // chemotaxis // traceable author statement /// 0007165 // signal transduction // traceable author statement /// 0007596 // blood…	0005576 // extracellular region // inferred from electronic annotation /// 0005788 // endoplasmic reticulum lumen // traceable author statement /// 0005789 // endoplasmic reticulum membrane // traceable author statement /// 0005886 // plasma membrane // inferred from direct assay /// 0005886 // plasma membrane // traceable author statement /// 0005887 // integral component of plasma membrane // i…	0004872 // receptor activity // non-traceable author statement /// 0005102 // receptor binding // inferred from physical interaction /// 0005515 // protein binding // inferred from physical interaction /// 0019899 // enzyme binding // inferred from physical interaction /// 0019904 // protein domain specific binding // inferred from physical interaction /// 0030377 // urokinase plasminogen activat…	---	chr19:44152731-44174699 (-) // 74.81 // q13.31
11743063_x_at	3.18879e-09	5.81013e-13	1.89963	0.925715	1.89963	up	5329	PLAUR	plasminogen activator, urokinase receptor	0001934 // positive regulation of protein phosphorylation // inferred from mutant phenotype /// 0006501 // C-terminal protein lipidation // traceable author statement /// 0006928 // movement of cell or subcellular component // non-traceable author statement /// 0006935 // chemotaxis // traceable author statement /// 0007165 // signal transduction // traceable author statement /// 0007596 // blood…	0005576 // extracellular region // inferred from electronic annotation /// 0005788 // endoplasmic reticulum lumen // traceable author statement /// 0005789 // endoplasmic reticulum membrane // traceable author statement /// 0005886 // plasma membrane // inferred from direct assay /// 0005886 // plasma membrane // traceable author statement /// 0005887 // integral component of plasma membrane // i…	0004872 // receptor activity // non-traceable author statement /// 0005102 // receptor binding // inferred from physical interaction /// 0005515 // protein binding // inferred from physical interaction /// 0019899 // enzyme binding // inferred from physical interaction /// 0019904 // protein domain specific binding // inferred from physical interaction /// 0030377 // urokinase plasminogen activat…	---	chr19:44152727-44174502 (-) // 84.08 // q13.31
11718841_s_at	3.30938e-09	6.69984e-13	2.3486	1.2318	2.3486	up	3576	CXCL8	chemokine (C-X-C motif) ligand 8	0001525 // angiogenesis // traceable author statement /// 0002237 // response to molecule of bacterial origin // inferred from direct assay /// 0006928 // movement of cell or subcellular component // traceable author statement /// 0006935 // chemotaxis // traceable author statement /// 0006954 // inflammatory response // traceable author statement /// 0006955 // immune response // not recorded //…	0005576 // extracellular region // traceable author statement /// 0005615 // extracellular space // inferred from electronic annotation /// 0005622 // intracellular // inferred from direct assay /// 0005622 // intracellular // traceable author statement	0005125 // cytokine activity // inferred from electronic annotation /// 0005153 // interleukin-8 receptor binding // inferred from physical interaction /// 0005515 // protein binding // inferred from physical interaction /// 0008009 // chemokine activity // traceable author statement	---	chr4:74606222-74609433 (+) // 67.34 // q13.3
11751548_a_at	3.98998e-09	8.88546e-13	2.4305	1.28125	2.4305	up	11067	C10orf10	chromosome 10 open reading frame 10	---	0005737 // cytoplasm // inferred from electronic annotation /// 0005739 // mitochondrion // inferred from direct assay	---	---	chr10:45472427-45474258 (-) // 89.54 // q11.21
11747399_x_at	4.46932e-09	1.11361e-12	2.14995	1.10431	2.14995	up	5327	PLAT	plasminogen activator, tissue	0001666 // response to hypoxia // inferred from electronic annotation /// 0006464 // cellular protein modification process // traceable author statement /// 0006508 // proteolysis // traceable author statement /// 0007596 // blood coagulation // traceable author statement /// 0014909 // smooth muscle cell migration // not recorded /// 0031639 // plasminogen activation // inferred from direct assa…	0005576 // extracellular region // traceable author statement /// 0005615 // extracellular space // not recorded /// 0005737 // cytoplasm // inferred from direct assay /// 0009986 // cell surface // inferred from direct assay /// 0030141 // secretory granule // inferred from electronic annotation /// 0031012 // extracellular matrix // inferred from direct assay /// 0045177 // apical part of cell …	0001948 // glycoprotein binding // traceable author statement /// 0004252 // serine-type endopeptidase activity // inferred from direct assay /// 0004252 // serine-type endopeptidase activity // traceable author statement /// 0005102 // receptor binding // inferred from physical interaction /// 0005515 // protein binding // inferred from physical interaction /// 0008233 // peptidase activity // i…	Blood_Clotting_Cascade // GenMAPP	chr8:42033078-42065083 (-) // 99.75 // p11.21
11754594_a_at	4.46932e-09	1.17626e-12	-1.82016	-0.864065	1.82016	down	1836	SLC26A2	solute carrier family 26 (anion exchanger), member 2	0001503 // ossification // inferred from electronic annotation /// 0005975 // carbohydrate metabolic process // traceable author statement /// 0006805 // xenobiotic metabolic process // traceable author statement /// 0006810 // transport // inferred from electronic annotation /// 0006811 // ion transport // traceable author statement /// 0008272 // sulfate transport // traceable author statement …	0005886 // plasma membrane // traceable author statement /// 0005887 // integral component of plasma membrane // traceable author statement /// 0016020 // membrane // traceable author statement /// 0016021 // integral component of membrane // inferred from electronic annotation /// 0070062 // extracellular exosome // inferred from direct assay	0005254 // chloride channel activity // not recorded /// 0008271 // secondary active sulfate transmembrane transporter activity // inferred from electronic annotation /// 0015106 // bicarbonate transmembrane transporter activity // not recorded /// 0015116 // sulfate transmembrane transporter activity // traceable author statement /// 0015301 // anion:anion antiporter activity // not recorded ///…	---	chr5:149360993-149366956 (+) // 86.71 // q32
11716665_s_at	5.74578e-09	1.62852e-12	1.7249	0.786513	1.7249	up	9518	GDF15	growth differentiation factor 15	0007165 // signal transduction // traceable author statement /// 0007179 // transforming growth factor beta receptor signaling pathway // traceable author statement /// 0007267 // cell-cell signaling // traceable author statement /// 0010862 // positive regulation of pathway-restricted SMAD protein phosphorylation // not recorded /// 0042981 // regulation of apoptotic process // not recorded /// …	0005576 // extracellular region // traceable author statement /// 0005615 // extracellular space // not recorded /// 0070062 // extracellular exosome // inferred from direct assay	0005125 // cytokine activity // inferred from electronic annotation /// 0005160 // transforming growth factor beta receptor binding // not recorded /// 0008083 // growth factor activity // inferred from electronic annotation	---	chr19:18496769-18499986 (+) // 92.72 // p13.11
11728827_at	5.78887e-09	1.75793e-12	1.75684	0.812983	1.75684	up	2150	F2RL1	coagulation factor II (thrombin) receptor-like 1	0002286 // T cell activation involved in immune response // inferred from sequence or structural similarity /// 0002376 // immune system process // inferred from electronic annotation /// 0002690 // positive regulation of leukocyte chemotaxis // inferred from direct assay /// 0002741 // positive regulation of cytokine secretion involved in immune response // inferred from direct assay /// 0003104…	0005769 // early endosome // inferred from direct assay /// 0005794 // Golgi apparatus // traceable author statement /// 0005829 // cytosol // inferred from direct assay /// 0005829 // cytosol // inferred from sequence or structural similarity /// 0005829 // cytosol // traceable author statement /// 0005886 // plasma membrane // inferred from direct assay /// 0005886 // plasma membrane // traceab…	0001965 // G-protein alpha-subunit binding // inferred from sequence or structural similarity /// 0004871 // signal transducer activity // inferred from electronic annotation /// 0004872 // receptor activity // traceable author statement /// 0004930 // G-protein coupled receptor activity // inferred from mutant phenotype /// 0004930 // G-protein coupled receptor activity // inferred from sequence…	GPCRDB_Class_A_Rhodopsin-like // GenMAPP	chr5:76114832-76131140 (+) // 78.56 // q13.3
11757667_x_at	6.17358e-09	2.11403e-12	-1.83067	-0.87237	1.83067	down	336	APOA2	apolipoprotein A-II	0001523 // retinoid metabolic process // traceable author statement /// 0002526 // acute inflammatory response // inferred from electronic annotation /// 0002740 // negative regulation of cytokine secretion involved in immune response // inferred from direct assay /// 0006457 // protein folding // inferred from direct assay /// 0006641 // triglyceride metabolic process // traceable author stateme…	0005576 // extracellular region // non-traceable author statement /// 0005576 // extracellular region // traceable author statement /// 0005615 // extracellular space // inferred from electronic annotation /// 0005769 // early endosome // traceable author statement /// 0005788 // endoplasmic reticulum lumen // traceable author statement /// 0005829 // cytosol // traceable author statement /// 003…	0005319 // lipid transporter activity // inferred from direct assay /// 0005515 // protein binding // inferred from physical interaction /// 0005543 // phospholipid binding // inferred from direct assay /// 0008035 // high-density lipoprotein particle binding // not recorded /// 0008289 // lipid binding // inferred from direct assay /// 0015485 // cholesterol binding // inferred from direct assay…	---	chr1:161192081-161193418 (-) // 94.17 // q23.3
11753131_x_at	6.17358e-09	2.14707e-12	1.90681	0.93116	1.90681	up	4071	TM4SF1	transmembrane 4 L six family member 1	---	0005887 // integral component of plasma membrane // inferred from direct assay /// 0016020 // membrane // inferred from electronic annotation /// 0016021 // integral component of membrane // inferred from electronic annotation	---	---	chr3:149087329-149095396 (-) // 83.5 // q25.1
200072_PM_s_at	6.17358e-09	2.24971e-12	-1.61723	-0.693525	1.61723	down	4670	HNRNPM	heterogeneous nuclear ribonucleoprotein M	0000380 // alternative mRNA splicing, via spliceosome // inferred from mutant phenotype /// 0000398 // mRNA splicing, via spliceosome // inferred by curator /// 0000398 // mRNA splicing, via spliceosome // traceable author statement /// 0006397 // mRNA processing // inferred from electronic annotation /// 0008380 // RNA splicing // traceable author statement /// 0010467 // gene expression // trac…	0005634 // nucleus // inferred from electronic annotation /// 0005654 // nucleoplasm // inferred from direct assay /// 0005654 // nucleoplasm // traceable author statement /// 0005681 // spliceosomal complex // inferred from direct assay /// 0005730 // nucleolus // inferred from electronic annotation /// 0005887 // integral component of plasma membrane // traceable author statement /// 0016020 //…	0000166 // nucleotide binding // inferred from electronic annotation /// 0003676 // nucleic acid binding // inferred from electronic annotation /// 0003723 // RNA binding // non-traceable author statement /// 0003823 // antigen binding // inferred from electronic annotation /// 0005515 // protein binding // inferred from physical interaction /// 0019904 // protein domain specific binding // infer…	---	chr19:8509650-8553885 (+) // 98.37 // p13.2
11754008_x_at	6.23696e-09	2.4279e-12	-1.71783	-0.780585	1.71783	down	3399	ID3	inhibitor of DNA binding 3, dominant negative helix-loop-helix protein	0000122 // negative regulation of transcription from RNA polymerase II promoter // inferred from electronic annotation /// 0001656 // metanephros development // inferred from electronic annotation /// 0006275 // regulation of DNA replication // inferred from electronic annotation /// 0006351 // transcription, DNA-templated // inferred from electronic annotation /// 0006355 // regulation of transc…	0005634 // nucleus // inferred by curator /// 0005654 // nucleoplasm // inferred from direct assay /// 0005737 // cytoplasm // inferred from electronic annotation /// 0015630 // microtubule cytoskeleton // inferred from direct assay	0003700 // transcription factor activity, sequence-specific DNA binding // inferred from electronic annotation /// 0003714 // transcription corepressor activity // traceable author statement /// 0005515 // protein binding // inferred from physical interaction /// 0008134 // transcription factor binding // inferred from electronic annotation /// 0019904 // protein domain specific binding // inferr…	---	chr1:23884431-23885969 (-) // 83.71 // p36.12
11744279_a_at	6.23696e-09	2.52534e-12	-1.68292	-0.75097	1.68292	down	83998	REG4	regenerating family member 4	---	0005576 // extracellular region // inferred from electronic annotation /// 0005737 // cytoplasm // inferred from direct assay	0005509 // calcium ion binding // inferred from direct assay /// 0008201 // heparin binding // inferred from direct assay /// 0030246 // carbohydrate binding // inferred from electronic annotation /// 2001065 // mannan binding // inferred from direct assay	---	chr1:120336640-120354277 (-) // 97.46 // p12
11721306_at	9.88083e-09	4.20078e-12	1.74072	0.799683	1.74072	up	22822	PHLDA1	pleckstrin homology-like domain, family A, member 1	0006915 // apoptotic process // inferred from electronic annotation /// 0021879 // forebrain neuron differentiation // inferred from electronic annotation /// 0043065 // positive regulation of apoptotic process // inferred from electronic annotation /// 0045210 // FasL biosynthetic process // inferred from electronic annotation	0005634 // nucleus // inferred from electronic annotation /// 0005654 // nucleoplasm // inferred from direct assay /// 0005730 // nucleolus // inferred from electronic annotation /// 0005737 // cytoplasm // inferred from electronic annotation /// 0005886 // plasma membrane // inferred from direct assay /// 0016020 // membrane // inferred from electronic annotation /// 0030659 // cytoplasmic vesic…	0005515 // protein binding // inferred from physical interaction	---	chr12:76419226-76425681 (-) // 86.13 // q21.2
11716663_a_at	1.05232e-08	4.68692e-12	1.78465	0.83564	1.78465	up	9518	GDF15	growth differentiation factor 15	0007165 // signal transduction // traceable author statement /// 0007179 // transforming growth factor beta receptor signaling pathway // traceable author statement /// 0007267 // cell-cell signaling // traceable author statement /// 0010862 // positive regulation of pathway-restricted SMAD protein phosphorylation // not recorded /// 0042981 // regulation of apoptotic process // not recorded /// …	0005576 // extracellular region // traceable author statement /// 0005615 // extracellular space // not recorded /// 0070062 // extracellular exosome // inferred from direct assay	0005125 // cytokine activity // inferred from electronic annotation /// 0005160 // transforming growth factor beta receptor binding // not recorded /// 0008083 // growth factor activity // inferred from electronic annotation	---	chr19:18496769-18499986 (+) // 92.72 // p13.11
11717190_s_at	1.06926e-08	5.17543e-12	1.64432	0.717495	1.64432	up	10628	TXNIP	thioredoxin interacting protein	0000122 // negative regulation of transcription from RNA polymerase II promoter // inferred from electronic annotation /// 0006351 // transcription, DNA-templated // inferred from electronic annotation /// 0006355 // regulation of transcription, DNA-templated // inferred from electronic annotation /// 0006606 // protein import into nucleus // inferred from electronic annotation /// 0006979 // res…	0005634 // nucleus // inferred from electronic annotation /// 0005737 // cytoplasm // inferred from direct assay /// 0005758 // mitochondrial intermembrane space // inferred from electronic annotation /// 0005829 // cytosol // traceable author statement	0004857 // enzyme inhibitor activity // inferred from electronic annotation /// 0005515 // protein binding // inferred from physical interaction /// 0031625 // ubiquitin protein ligase binding // inferred from physical interaction	---	chr1:145438488-145442635 (+) // 96.86 // q21.1
11724134_a_at	1.06926e-08	5.19533e-12	-1.54599	-0.628535	1.54599	down	6558	SLC12A2	solute carrier family 12 (sodium/potassium/chloride transporter), member 2	0006810 // transport // traceable author statement /// 0006811 // ion transport // traceable author statement /// 0006813 // potassium ion transport // inferred from electronic annotation /// 0006814 // sodium ion transport // inferred from electronic annotation /// 0006821 // chloride transport // inferred from electronic annotation /// 0006884 // cell volume homeostasis // not recorded /// 0006…	0005886 // plasma membrane // traceable author statement /// 0005887 // integral component of plasma membrane // traceable author statement /// 0016020 // membrane // traceable author statement /// 0016021 // integral component of membrane // inferred from electronic annotation /// 0016323 // basolateral plasma membrane // inferred from electronic annotation /// 0016324 // apical plasma membrane …	0005215 // transporter activity // inferred from electronic annotation /// 0005515 // protein binding // inferred from physical interaction /// 0008511 // sodium:potassium:chloride symporter activity // traceable author statement /// 0008519 // ammonium transmembrane transporter activity // inferred from direct assay /// 0015081 // sodium ion transmembrane transporter activity // not recorded ///…	---	chr5:127419457-127525374 (+) // 92.82 // q23.3
11724724_a_at	1.14943e-08	5.81756e-12	-1.65409	-0.726038	1.65409	down	1983	EIF5	eukaryotic translation initiation factor 5	0006412 // translation // traceable author statement /// 0006413 // translational initiation // non-traceable author statement /// 0006413 // translational initiation // traceable author statement /// 0006446 // regulation of translational initiation // inferred from direct assay /// 0010467 // gene expression // traceable author statement /// 0044267 // cellular protein metabolic process // trac…	0005634 // nucleus // inferred from direct assay /// 0005737 // cytoplasm // inferred from direct assay /// 0005829 // cytosol // non-traceable author statement /// 0005829 // cytosol // traceable author statement /// 0005886 // plasma membrane // inferred from direct assay	0000166 // nucleotide binding // inferred from electronic annotation /// 0003743 // translation initiation factor activity // non-traceable author statement /// 0003924 // GTPase activity // traceable author statement /// 0005488 // binding // inferred from electronic annotation /// 0005515 // protein binding // inferred from physical interaction /// 0005525 // GTP binding // inferred from electr…	Translation_Factors // GenMAPP	chr14:103800338-103811362 (+) // 90.52 // q32.32
11753129_a_at	1.20403e-08	6.33763e-12	1.898	0.924477	1.898	up	4071	TM4SF1	transmembrane 4 L six family member 1	---	0005887 // integral component of plasma membrane // inferred from direct assay /// 0016020 // membrane // inferred from electronic annotation /// 0016021 // integral component of membrane // inferred from electronic annotation	---	---	chr3:149087329-149095396 (-) // 83.5 // q25.1
11749809_a_at	1.25534e-08	7.351e-12	2.39563	1.2604	2.39563	up	5327	PLAT	plasminogen activator, tissue	0001666 // response to hypoxia // inferred from electronic annotation /// 0006464 // cellular protein modification process // traceable author statement /// 0006508 // proteolysis // traceable author statement /// 0007596 // blood coagulation // traceable author statement /// 0014909 // smooth muscle cell migration // not recorded /// 0031639 // plasminogen activation // inferred from direct assa…	0005576 // extracellular region // traceable author statement /// 0005615 // extracellular space // not recorded /// 0005737 // cytoplasm // inferred from direct assay /// 0009986 // cell surface // inferred from direct assay /// 0030141 // secretory granule // inferred from electronic annotation /// 0031012 // extracellular matrix // inferred from direct assay /// 0045177 // apical part of cell …	0001948 // glycoprotein binding // traceable author statement /// 0004252 // serine-type endopeptidase activity // inferred from direct assay /// 0004252 // serine-type endopeptidase activity // traceable author statement /// 0005102 // receptor binding // inferred from physical interaction /// 0005515 // protein binding // inferred from physical interaction /// 0008233 // peptidase activity // i…	Blood_Clotting_Cascade // GenMAPP	chr8:42033264-42065083 (-) // 99.88 // p11.21
11754595_s_at	1.25534e-08	7.4408e-12	-1.6565	-0.728143	1.6565	down	1836	SLC26A2	solute carrier family 26 (anion exchanger), member 2	0001503 // ossification // inferred from electronic annotation /// 0005975 // carbohydrate metabolic process // traceable author statement /// 0006805 // xenobiotic metabolic process // traceable author statement /// 0006810 // transport // inferred from electronic annotation /// 0006811 // ion transport // traceable author statement /// 0008272 // sulfate transport // traceable author statement …	0005886 // plasma membrane // traceable author statement /// 0005887 // integral component of plasma membrane // traceable author statement /// 0016020 // membrane // traceable author statement /// 0016021 // integral component of membrane // inferred from electronic annotation /// 0070062 // extracellular exosome // inferred from direct assay	0005254 // chloride channel activity // not recorded /// 0008271 // secondary active sulfate transmembrane transporter activity // inferred from electronic annotation /// 0015106 // bicarbonate transmembrane transporter activity // not recorded /// 0015116 // sulfate transmembrane transporter activity // traceable author statement /// 0015301 // anion:anion antiporter activity // not recorded ///…	---	chr5:149360993-149366956 (+) // 86.71 // q32
11716664_x_at	1.25534e-08	7.58336e-12	1.63053	0.705345	1.63053	up	9518	GDF15	growth differentiation factor 15	0007165 // signal transduction // traceable author statement /// 0007179 // transforming growth factor beta receptor signaling pathway // traceable author statement /// 0007267 // cell-cell signaling // traceable author statement /// 0010862 // positive regulation of pathway-restricted SMAD protein phosphorylation // not recorded /// 0042981 // regulation of apoptotic process // not recorded /// …	0005576 // extracellular region // traceable author statement /// 0005615 // extracellular space // not recorded /// 0070062 // extracellular exosome // inferred from direct assay	0005125 // cytokine activity // inferred from electronic annotation /// 0005160 // transforming growth factor beta receptor binding // not recorded /// 0008083 // growth factor activity // inferred from electronic annotation	---	chr19:18496769-18499986 (+) // 92.72 // p13.11
11745810_a_at	1.25534e-08	7.73518e-12	1.82146	0.865095	1.82146	up	9674	KIAA0040	KIAA0040	---	0016020 // membrane // inferred from electronic annotation /// 0016021 // integral component of membrane // inferred from electronic annotation	0005515 // protein binding // inferred from physical interaction	---	chr1:175126122-175162065 (-) // 92.04 // q25.1
11732321_a_at	1.25534e-08	7.87842e-12	2.33351	1.2225	2.33351	up	5327	PLAT	plasminogen activator, tissue	0001666 // response to hypoxia // inferred from electronic annotation /// 0006464 // cellular protein modification process // traceable author statement /// 0006508 // proteolysis // traceable author statement /// 0007596 // blood coagulation // traceable author statement /// 0014909 // smooth muscle cell migration // not recorded /// 0031639 // plasminogen activation // inferred from direct assa…	0005576 // extracellular region // traceable author statement /// 0005615 // extracellular space // not recorded /// 0005737 // cytoplasm // inferred from direct assay /// 0009986 // cell surface // inferred from direct assay /// 0030141 // secretory granule // inferred from electronic annotation /// 0031012 // extracellular matrix // inferred from direct assay /// 0045177 // apical part of cell …	0001948 // glycoprotein binding // traceable author statement /// 0004252 // serine-type endopeptidase activity // inferred from direct assay /// 0004252 // serine-type endopeptidase activity // traceable author statement /// 0005102 // receptor binding // inferred from physical interaction /// 0005515 // protein binding // inferred from physical interaction /// 0008233 // peptidase activity // i…	Blood_Clotting_Cascade // GenMAPP	chr8:42032235-42065194 (-) // 99.41 // p11.21
11727621_a_at	1.29649e-08	8.39919e-12	1.89445	0.921782	1.89445	up	200879	LIPH	lipase, member H	0006629 // lipid metabolic process // inferred from electronic annotation /// 0008152 // metabolic process // inferred from electronic annotation /// 0016042 // lipid catabolic process // inferred from direct assay	0005576 // extracellular region // inferred from electronic annotation /// 0005615 // extracellular space // inferred from direct assay /// 0005886 // plasma membrane // inferred from direct assay /// 0016020 // membrane // inferred from electronic annotation	0004620 // phospholipase activity // inferred from direct assay /// 0008201 // heparin binding // inferred from direct assay /// 0016787 // hydrolase activity // inferred from electronic annotation /// 0052689 // carboxylic ester hydrolase activity // inferred from electronic annotation	LIPAS-PWY // HumanCyc /// Statin_Pathway_PharmGKB // GenMAPP	chr3:185225566-185270401 (-) // 99.96 // q27.2
11743972_a_at	1.58692e-08	1.0602e-11	1.88576	0.915142	1.88576	up	54541	DDIT4	DNA damage inducible transcript 4	0001666 // response to hypoxia // inferred from direct assay /// 0001764 // neuron migration // inferred from sequence or structural similarity /// 0006367 // transcription initiation from RNA polymerase II promoter // traceable author statement /// 0006915 // apoptotic process // inferred from electronic annotation /// 0007420 // brain development // inferred from sequence or structural similari…	0005622 // intracellular // inferred from direct assay /// 0005737 // cytoplasm // inferred from direct assay /// 0005739 // mitochondrion // inferred from electronic annotation /// 0005829 // cytosol // traceable author statement	0071889 // 14-3-3 protein binding // inferred from electronic annotation	---	chr10:74033162-74035794 (+) // 97.11 // q22.1
11760200_a_at	2.11432e-08	1.45534e-11	1.78893	0.839097	1.78893	up	6303	SAT1	spermidine/spermine N1-acetyltransferase 1	0001525 // angiogenesis // inferred from expression pattern /// 0006595 // polyamine metabolic process // traceable author statement /// 0006596 // polyamine biosynthetic process // traceable author statement /// 0008152 // metabolic process // inferred from electronic annotation /// 0009447 // putrescine catabolic process // inferred from electronic annotation /// 0034641 // cellular nitrogen co…	0005622 // intracellular // inferred from direct assay /// 0005737 // cytoplasm // inferred from electronic annotation /// 0005829 // cytosol // traceable author statement	0004145 // diamine N-acetyltransferase activity // inferred from electronic annotation /// 0005515 // protein binding // inferred from physical interaction /// 0008080 // N-acetyltransferase activity // inferred from electronic annotation /// 0016740 // transferase activity // inferred from electronic annotation /// 0016746 // transferase activity, transferring acyl groups // inferred from electr…	Nucleotide_Metabolism // GenMAPP	chrX:23801287-23804039 (+) // 94.8 // p22.11
11716780_s_at	2.18358e-08	1.54723e-11	1.41702	0.502858	1.41702	up	1364	CLDN4	claudin 4	0007165 // signal transduction // traceable author statement /// 0007565 // female pregnancy // inferred from electronic annotation /// 0007623 // circadian rhythm // inferred from electronic annotation /// 0016338 // calcium-independent cell-cell adhesion via plasma membrane cell-adhesion molecules // inferred from sequence or structural similarity /// 0032570 // response to progesterone // infe…	0005886 // plasma membrane // traceable author statement /// 0005887 // integral component of plasma membrane // inferred from mutant phenotype /// 0005923 // bicellular tight junction // inferred from direct assay /// 0005923 // bicellular tight junction // inferred from sequence or structural similarity /// 0009925 // basal plasma membrane // inferred from electronic annotation /// 0016020 // m…	0004888 // transmembrane signaling receptor activity // traceable author statement /// 0005198 // structural molecule activity // inferred from electronic annotation /// 0005515 // protein binding // inferred from electronic annotation /// 0042802 // identical protein binding // inferred from sequence or structural similarity	---	chr7:73245192-73247015 (+) // 95.14 // q11.23
11748544_s_at	2.1891e-08	1.59546e-11	1.61174	0.688622	1.61174	up	10628	TXNIP	thioredoxin interacting protein	0000122 // negative regulation of transcription from RNA polymerase II promoter // inferred from electronic annotation /// 0006351 // transcription, DNA-templated // inferred from electronic annotation /// 0006355 // regulation of transcription, DNA-templated // inferred from electronic annotation /// 0006606 // protein import into nucleus // inferred from electronic annotation /// 0006979 // res…	0005634 // nucleus // inferred from electronic annotation /// 0005737 // cytoplasm // inferred from direct assay /// 0005758 // mitochondrial intermembrane space // inferred from electronic annotation /// 0005829 // cytosol // traceable author statement	0004857 // enzyme inhibitor activity // inferred from electronic annotation /// 0005515 // protein binding // inferred from physical interaction /// 0031625 // ubiquitin protein ligase binding // inferred from physical interaction	---	chr1:145439346-145441230 (+) // 100.0 // q21.1
11717301_at	2.34869e-08	1.77619e-11	1.50657	0.591267	1.50657	up	4070	TACSTD2	tumor-associated calcium signal transducer 2	0007049 // cell cycle // inferred from electronic annotation /// 0007166 // cell surface receptor signaling pathway // traceable author statement /// 0007601 // visual perception // inferred from electronic annotation /// 0008283 // cell proliferation // traceable author statement /// 0010633 // negative regulation of epithelial cell migration // inferred from sequence or structural similarity //…	0005615 // extracellular space // inferred from electronic annotation /// 0005634 // nucleus // inferred from electronic annotation /// 0005829 // cytosol // traceable author statement /// 0005886 // plasma membrane // inferred from electronic annotation /// 0005887 // integral component of plasma membrane // traceable author statement /// 0009925 // basal plasma membrane // inferred from sequenc…	0004872 // receptor activity // traceable author statement /// 0005515 // protein binding // inferred from physical interaction	---	chr1:59040642-59043445 (-) // 93.41 // p32.1
11747398_a_at	2.34869e-08	1.85407e-11	2.01573	1.0113	2.01573	up	5327	PLAT	plasminogen activator, tissue	0001666 // response to hypoxia // inferred from electronic annotation /// 0006464 // cellular protein modification process // traceable author statement /// 0006508 // proteolysis // traceable author statement /// 0007596 // blood coagulation // traceable author statement /// 0014909 // smooth muscle cell migration // not recorded /// 0031639 // plasminogen activation // inferred from direct assa…	0005576 // extracellular region // traceable author statement /// 0005615 // extracellular space // not recorded /// 0005737 // cytoplasm // inferred from direct assay /// 0009986 // cell surface // inferred from direct assay /// 0030141 // secretory granule // inferred from electronic annotation /// 0031012 // extracellular matrix // inferred from direct assay /// 0045177 // apical part of cell …	0001948 // glycoprotein binding // traceable author statement /// 0004252 // serine-type endopeptidase activity // inferred from direct assay /// 0004252 // serine-type endopeptidase activity // traceable author statement /// 0005102 // receptor binding // inferred from physical interaction /// 0005515 // protein binding // inferred from physical interaction /// 0008233 // peptidase activity // i…	Blood_Clotting_Cascade // GenMAPP	chr8:42033078-42065083 (-) // 99.75 // p11.21
11723263_a_at	2.34869e-08	1.85442e-11	1.77945	0.83143	1.77945	up	196394	AMN1	antagonist of mitotic exit network 1 homolog	---	---	---	---	chr12:31824081-31882108 (-) // 98.13 // p11.21
11746772_a_at	2.48305e-08	2.03474e-11	-1.66639	-0.736725	1.66639	down	83998	REG4	regenerating family member 4	---	0005576 // extracellular region // inferred from electronic annotation /// 0005737 // cytoplasm // inferred from direct assay	0005509 // calcium ion binding // inferred from direct assay /// 0008201 // heparin binding // inferred from direct assay /// 0030246 // carbohydrate binding // inferred from electronic annotation /// 2001065 // mannan binding // inferred from direct assay	---	chr1:120336640-120354203 (-) // 99.8 // p12
11723321_at	2.48305e-08	2.06104e-11	-1.71205	-0.775725	1.71205	down	84085	FBXO30	F-box protein 30	0016567 // protein ubiquitination // inferred from electronic annotation	---	0004842 // ubiquitin-protein transferase activity // inferred from electronic annotation /// 0005515 // protein binding // inferred from electronic annotation /// 0008270 // zinc ion binding // inferred from electronic annotation /// 0046872 // metal ion binding // inferred from electronic annotation /// 0061630 // ubiquitin protein ligase activity // inferred from electronic annotation	---	chr6:146119270-146135927 (-) // 99.08 // q24.3
11757404_x_at	2.5717e-08	2.18669e-11	-1.71296	-0.776488	1.71296	down	3399	ID3	inhibitor of DNA binding 3, dominant negative helix-loop-helix protein	0000122 // negative regulation of transcription from RNA polymerase II promoter // inferred from electronic annotation /// 0001656 // metanephros development // inferred from electronic annotation /// 0006275 // regulation of DNA replication // inferred from electronic annotation /// 0006351 // transcription, DNA-templated // inferred from electronic annotation /// 0006355 // regulation of transc…	0005634 // nucleus // inferred by curator /// 0005654 // nucleoplasm // inferred from direct assay /// 0005737 // cytoplasm // inferred from electronic annotation /// 0015630 // microtubule cytoskeleton // inferred from direct assay	0003700 // transcription factor activity, sequence-specific DNA binding // inferred from electronic annotation /// 0003714 // transcription corepressor activity // traceable author statement /// 0005515 // protein binding // inferred from physical interaction /// 0008134 // transcription factor binding // inferred from electronic annotation /// 0019904 // protein domain specific binding // inferr…	---	chr1:23884423-23885474 (-) // 97.43 // p36.12
11753130_at	2.83362e-08	2.53441e-11	1.87647	0.90802	1.87647	up	4071	TM4SF1	transmembrane 4 L six family member 1	---	0005887 // integral component of plasma membrane // inferred from direct assay /// 0016020 // membrane // inferred from electronic annotation /// 0016021 // integral component of membrane // inferred from electronic annotation	---	---	chr3:149087329-149095396 (-) // 83.5 // q25.1
11753839_x_at	2.83362e-08	2.53915e-11	-1.68312	-0.751137	1.68312	down	336	APOA2	apolipoprotein A-II	0001523 // retinoid metabolic process // traceable author statement /// 0002526 // acute inflammatory response // inferred from electronic annotation /// 0002740 // negative regulation of cytokine secretion involved in immune response // inferred from direct assay /// 0006457 // protein folding // inferred from direct assay /// 0006641 // triglyceride metabolic process // traceable author stateme…	0005576 // extracellular region // non-traceable author statement /// 0005576 // extracellular region // traceable author statement /// 0005615 // extracellular space // inferred from electronic annotation /// 0005769 // early endosome // traceable author statement /// 0005788 // endoplasmic reticulum lumen // traceable author statement /// 0005829 // cytosol // traceable author statement /// 003…	0005319 // lipid transporter activity // inferred from direct assay /// 0005515 // protein binding // inferred from physical interaction /// 0005543 // phospholipid binding // inferred from direct assay /// 0008035 // high-density lipoprotein particle binding // not recorded /// 0008289 // lipid binding // inferred from direct assay /// 0015485 // cholesterol binding // inferred from direct assay…	---	chr1:161192108-161193198 (-) // 100.0 // q23.3
11718101_at	2.83362e-08	2.58149e-11	1.59808	0.676342	1.59808	up	966	CD59	CD59 molecule, complement regulatory protein	0001775 // cell activation // not recorded /// 0001971 // negative regulation of activation of membrane attack complex // inferred from electronic annotation /// 0006888 // ER to Golgi vesicle-mediated transport // traceable author statement /// 0007166 // cell surface receptor signaling pathway // traceable author statement /// 0007596 // blood coagulation // traceable author statement /// 00182…	0000139 // Golgi membrane // traceable author statement /// 0005576 // extracellular region // not recorded /// 0005615 // extracellular space // inferred from direct assay /// 0005789 // endoplasmic reticulum membrane // traceable author statement /// 0005886 // plasma membrane // traceable author statement /// 0005925 // focal adhesion // inferred from direct assay /// 0009986 // cell surface /…	0001848 // complement binding // not recorded /// 0005515 // protein binding // inferred from physical interaction	---	chr11:33724555-33744276 (-) // 84.95 // p13
11716048_at	3.59866e-08	3.35132e-11	1.56821	0.649115	1.56821	up	10221	TRIB1	tribbles pseudokinase 1	0006468 // protein phosphorylation // traceable author statement /// 0006469 // negative regulation of protein kinase activity // inferred from mutant phenotype /// 0007254 // JNK cascade // inferred from mutant phenotype /// 0014912 // negative regulation of smooth muscle cell migration // inferred from mutant phenotype /// 0031665 // negative regulation of lipopolysaccharide-mediated signaling …	0005634 // nucleus // inferred from direct assay /// 0005737 // cytoplasm // inferred from direct assay	0004672 // protein kinase activity // traceable author statement /// 0004860 // protein kinase inhibitor activity // inferred from mutant phenotype /// 0005524 // ATP binding // traceable author statement /// 0008134 // transcription factor binding // inferred from physical interaction /// 0016772 // transferase activity, transferring phosphorus-containing groups // inferred from electronic annot…	---	chr8:126442560-126450639 (+) // 90.44 // q24.13
11746135_x_at	3.88441e-08	3.76294e-11	-1.57474	-0.65511	1.57474	down	10528	NOP56	NOP56 ribonucleoprotein	0000154 // rRNA modification // not recorded /// 0006364 // rRNA processing // traceable author statement /// 0042254 // ribosome biogenesis // inferred from electronic annotation	0005634 // nucleus // inferred from electronic annotation /// 0005654 // nucleoplasm // inferred from electronic annotation /// 0005730 // nucleolus // inferred from direct assay /// 0005732 // small nucleolar ribonucleoprotein complex // inferred from direct assay /// 0005737 // cytoplasm // inferred from electronic annotation /// 0016020 // membrane // inferred from direct assay /// 0030529 // …	0003723 // RNA binding // traceable author statement /// 0005515 // protein binding // inferred from physical interaction /// 0030515 // snoRNA binding // inferred from direct assay /// 0044822 // poly(A) RNA binding // inferred from direct assay /// 1990226 // histone methyltransferase binding // inferred from physical interaction	---	chr20:2636332-2639035 (+) // 94.37 // p13
11728699_at	3.88441e-08	3.77471e-11	-1.84172	-0.881055	1.84172	down	659	BMPR2	bone morphogenetic protein receptor type II	0001707 // mesoderm formation // inferred from sequence or structural similarity /// 0001893 // maternal placenta development // inferred from electronic annotation /// 0001935 // endothelial cell proliferation // inferred from mutant phenotype /// 0001938 // positive regulation of endothelial cell proliferation // inferred from mutant phenotype /// 0001946 // lymphangiogenesis // inferred from s…	0005615 // extracellular space // inferred from direct assay /// 0005737 // cytoplasm // inferred from electronic annotation /// 0005886 // plasma membrane // inferred from direct assay /// 0005886 // plasma membrane // traceable author statement /// 0005887 // integral component of plasma membrane // inferred from direct assay /// 0005901 // caveola // inferred from mutant phenotype /// 0009925 …	0000166 // nucleotide binding // inferred from electronic annotation /// 0004672 // protein kinase activity // inferred from electronic annotation /// 0004674 // protein serine/threonine kinase activity // inferred from electronic annotation /// 0004675 // transmembrane receptor protein serine/threonine kinase activity // inferred from electronic annotation /// 0004702 // receptor signaling prote…	---	chr2:203240944-203432467 (+) // 89.64 // q33.1
11755342_x_at	4.10556e-08	4.07273e-11	-1.56649	-0.647537	1.56649	down	10528	NOP56	NOP56 ribonucleoprotein	0000154 // rRNA modification // not recorded /// 0006364 // rRNA processing // traceable author statement /// 0042254 // ribosome biogenesis // inferred from electronic annotation	0005634 // nucleus // inferred from electronic annotation /// 0005654 // nucleoplasm // inferred from electronic annotation /// 0005730 // nucleolus // inferred from direct assay /// 0005732 // small nucleolar ribonucleoprotein complex // inferred from direct assay /// 0005737 // cytoplasm // inferred from electronic annotation /// 0016020 // membrane // inferred from direct assay /// 0030529 // …	0003723 // RNA binding // traceable author statement /// 0005515 // protein binding // inferred from physical interaction /// 0030515 // snoRNA binding // inferred from direct assay /// 0044822 // poly(A) RNA binding // inferred from direct assay /// 1990226 // histone methyltransferase binding // inferred from physical interaction	---	chr20:2633673-2639038 (+) // 94.05 // p13
11731909_a_at	4.25646e-08	4.35608e-11	1.60132	0.67926	1.60132	up	11202	KLK8	kallikrein related peptidase 8	0006508 // proteolysis // not recorded /// 0007613 // memory // not recorded /// 0007613 // memory // inferred from sequence or structural similarity /// 0008219 // cell death // inferred from sequence or structural similarity /// 0009611 // response to wounding // inferred from sequence or structural similarity /// 0031642 // negative regulation of myelination // inferred from sequence or struct…	0005576 // extracellular region // inferred from electronic annotation /// 0005615 // extracellular space // not recorded /// 0005615 // extracellular space // inferred from sequence or structural similarity /// 0005737 // cytoplasm // inferred from direct assay /// 0030141 // secretory granule // not recorded	0004252 // serine-type endopeptidase activity // inferred from direct assay /// 0005515 // protein binding // inferred from physical interaction /// 0008233 // peptidase activity // inferred from electronic annotation /// 0008236 // serine-type peptidase activity // inferred from electronic annotation /// 0016787 // hydrolase activity // inferred from electronic annotation	---	chr19:51499264-51504958 (-) // 92.07 // q13.41
11744371_s_at	4.25646e-08	4.39476e-11	1.44369	0.52976	1.44369	up	1364	CLDN4	claudin 4	0007165 // signal transduction // traceable author statement /// 0007565 // female pregnancy // inferred from electronic annotation /// 0007623 // circadian rhythm // inferred from electronic annotation /// 0016338 // calcium-independent cell-cell adhesion via plasma membrane cell-adhesion molecules // inferred from sequence or structural similarity /// 0032570 // response to progesterone // infe…	0005886 // plasma membrane // traceable author statement /// 0005887 // integral component of plasma membrane // inferred from mutant phenotype /// 0005923 // bicellular tight junction // inferred from direct assay /// 0005923 // bicellular tight junction // inferred from sequence or structural similarity /// 0009925 // basal plasma membrane // inferred from electronic annotation /// 0016020 // m…	0004888 // transmembrane signaling receptor activity // traceable author statement /// 0005198 // structural molecule activity // inferred from electronic annotation /// 0005515 // protein binding // inferred from electronic annotation /// 0042802 // identical protein binding // inferred from sequence or structural similarity	---	chr7:73242073-73247012 (+) // 81.87 // q11.23
11741510_a_at	5.24845e-08	5.52525e-11	1.57558	0.655885	1.57558	up	9709	HERPUD1	homocysteine-inducible, endoplasmic reticulum stress-inducible, ubiquitin-like domain member 1	0006511 // ubiquitin-dependent protein catabolic process // inferred from electronic annotation /// 0006874 // cellular calcium ion homeostasis // inferred from electronic annotation /// 0006986 // response to unfolded protein // inferred from expression pattern /// 0030968 // endoplasmic reticulum unfolded protein response // traceable author statement /// 0030970 // retrograde protein transport…	0005783 // endoplasmic reticulum // inferred from direct assay /// 0005789 // endoplasmic reticulum membrane // inferred from direct assay /// 0005789 // endoplasmic reticulum membrane // traceable author statement /// 0016020 // membrane // inferred from direct assay /// 0016021 // integral component of membrane // inferred from electronic annotation /// 0034704 // calcium channel complex // inf…	0005515 // protein binding // inferred from physical interaction /// 0044325 // ion channel binding // inferred from physical interaction	Circadian_Exercise // GenMAPP	chr16:56965747-56977793 (+) // 94.65 // q13
11715795_at	5.50385e-08	5.90554e-11	1.48483	0.570297	1.48483	up	7873	MANF	mesencephalic astrocyte-derived neurotrophic factor	0002014 // vasoconstriction of artery involved in ischemic response to lowering of systemic arterial blood pressure // inferred from electronic annotation /// 0006986 // response to unfolded protein // inferred from electronic annotation	0005576 // extracellular region // inferred from electronic annotation /// 0005615 // extracellular space // inferred from electronic annotation /// 0005634 // nucleus // inferred from direct assay /// 0005783 // endoplasmic reticulum // inferred from electronic annotation /// 0048471 // perinuclear region of cytoplasm // inferred from electronic annotation	0008083 // growth factor activity // inferred from electronic annotation /// 0044822 // poly(A) RNA binding // inferred from direct assay	---	chr3:51422486-51426767 (+) // 71.17 // p21.2
11715477_at	5.72251e-08	6.256e-11	-1.6219	-0.697687	1.6219	down	7037	TFRC	transferrin receptor	0001558 // regulation of cell growth // inferred from mutant phenotype /// 0001666 // response to hypoxia // inferred from electronic annotation /// 0006879 // cellular iron ion homeostasis // non-traceable author statement /// 0006879 // cellular iron ion homeostasis // traceable author statement /// 0006897 // endocytosis // inferred from electronic annotation /// 0006898 // receptor-mediated e…	0005576 // extracellular region // inferred from direct assay /// 0005615 // extracellular space // inferred from direct assay /// 0005739 // mitochondrion // inferred from electronic annotation /// 0005768 // endosome // inferred from direct assay /// 0005886 // plasma membrane // traceable author statement /// 0005887 // integral component of plasma membrane // inferred from genetic interaction…	0001618 // virus receptor activity // inferred from electronic annotation /// 0001948 // glycoprotein binding // inferred from physical interaction /// 0003725 // double-stranded RNA binding // inferred from direct assay /// 0004998 // transferrin receptor activity // inferred by curator /// 0004998 // transferrin receptor activity // non-traceable author statement /// 0005515 // protein binding …	---	chr3:195776154-195809200 (-) // 97.68 // q29
11745190_a_at	6.06792e-08	6.94771e-11	-1.44047	-0.52654	1.44047	down	2521	FUS	FUS RNA binding protein	0000398 // mRNA splicing, via spliceosome // traceable author statement /// 0008380 // RNA splicing // traceable author statement /// 0010467 // gene expression // traceable author statement /// 0071277 // cellular response to calcium ion // inferred from electronic annotation /// 1903506 // regulation of nucleic acid-templated transcription // inferred from direct assay	0005634 // nucleus // inferred from direct assay /// 0005654 // nucleoplasm // inferred from direct assay /// 0005654 // nucleoplasm // traceable author statement /// 0005737 // cytoplasm // inferred from electronic annotation /// 0005844 // polysome // inferred from electronic annotation /// 0016020 // membrane // inferred from electronic annotation /// 0016021 // integral component of membrane …	0000166 // nucleotide binding // inferred from electronic annotation /// 0003676 // nucleic acid binding // inferred from electronic annotation /// 0003677 // DNA binding // inferred from electronic annotation /// 0003713 // transcription coactivator activity // inferred from direct assay /// 0003723 // RNA binding // traceable author statement /// 0005515 // protein binding // inferred from phys…	mRNA_processing_Reactome // GenMAPP	chr16:31191461-31202925 (+) // 91.14 // p11.2
11756156_s_at	6.06792e-08	6.99375e-11	-1.6318	-0.706467	1.6318	down	7037	TFRC	transferrin receptor	0001558 // regulation of cell growth // inferred from mutant phenotype /// 0001666 // response to hypoxia // inferred from electronic annotation /// 0006879 // cellular iron ion homeostasis // non-traceable author statement /// 0006879 // cellular iron ion homeostasis // traceable author statement /// 0006897 // endocytosis // inferred from electronic annotation /// 0006898 // receptor-mediated e…	0005576 // extracellular region // inferred from direct assay /// 0005615 // extracellular space // inferred from direct assay /// 0005739 // mitochondrion // inferred from electronic annotation /// 0005768 // endosome // inferred from direct assay /// 0005886 // plasma membrane // traceable author statement /// 0005887 // integral component of plasma membrane // inferred from genetic interaction…	0001618 // virus receptor activity // inferred from electronic annotation /// 0001948 // glycoprotein binding // inferred from physical interaction /// 0003725 // double-stranded RNA binding // inferred from direct assay /// 0004998 // transferrin receptor activity // inferred by curator /// 0004998 // transferrin receptor activity // non-traceable author statement /// 0005515 // protein binding …	---	chr3:195776158-195776716 (-) // 82.51 // q29
11733616_at	6.06792e-08	7.02695e-11	1.92123	0.942028	1.92123	up	3176	HNMT	histamine N-methyltransferase	0002347 // response to tumor cell // inferred from electronic annotation /// 0006548 // histidine catabolic process // traceable author statement /// 0006972 // hyperosmotic response // inferred from electronic annotation /// 0007420 // brain development // not recorded /// 0007585 // respiratory gaseous exchange // traceable author statement /// 0014075 // response to amine // inferred from elec…	0005654 // nucleoplasm // inferred from direct assay /// 0005737 // cytoplasm // inferred from direct assay /// 0005829 // cytosol // traceable author statement /// 0043005 // neuron projection // not recorded /// 0070062 // extracellular exosome // inferred from direct assay	0008168 // methyltransferase activity // inferred from electronic annotation /// 0008170 // N-methyltransferase activity // inferred from electronic annotation /// 0016740 // transferase activity // inferred from electronic annotation /// 0046539 // histamine N-methyltransferase activity // not recorded	---	chr2:138721807-138727786 (+) // 51.85 // q22.1
11719934_a_at	6.06792e-08	7.15087e-11	1.78412	0.835212	1.78412	up	7086	TKT	transketolase	0005975 // carbohydrate metabolic process // traceable author statement /// 0005999 // xylulose biosynthetic process // traceable author statement /// 0006098 // pentose-phosphate shunt // traceable author statement /// 0006112 // energy reserve metabolic process // traceable author statement /// 0008152 // metabolic process // inferred from electronic annotation /// 0009052 // pentose-phosphate …	0005634 // nucleus // inferred from direct assay /// 0005654 // nucleoplasm // inferred from direct assay /// 0005777 // peroxisome // inferred from sequence or structural similarity /// 0005829 // cytosol // traceable author statement /// 0031982 // vesicle // inferred from direct assay /// 0043209 // myelin sheath // inferred from electronic annotation /// 0070062 // extracellular exosome // in…	0003824 // catalytic activity // inferred from electronic annotation /// 0004802 // transketolase activity // not recorded /// 0004802 // transketolase activity // inferred from direct assay /// 0005515 // protein binding // inferred from physical interaction /// 0016740 // transferase activity // inferred from electronic annotation /// 0042803 // protein homodimerization activity // inferred fro…	Pentose_Phosphate_Pathway // GenMAPP	chr3:53258730-53290068 (-) // 93.48 // p21.1
11717039_a_at	6.06792e-08	7.24784e-11	1.46756	0.553423	1.46756	up	1647	GADD45A	growth arrest and DNA damage inducible alpha	0000079 // regulation of cyclin-dependent protein serine/threonine kinase activity // traceable author statement /// 0000086 // G2/M transition of mitotic cell cycle // inferred from electronic annotation /// 0000185 // activation of MAPKKK activity // inferred from direct assay /// 0006281 // DNA repair // traceable author statement /// 0006469 // negative regulation of protein kinase activity /…	0005634 // nucleus // inferred from direct assay /// 0005654 // nucleoplasm // inferred from direct assay /// 0005737 // cytoplasm // inferred from direct assay	0001047 // core promoter binding // inferred from electronic annotation /// 0005515 // protein binding // inferred from physical interaction	Cell_cycle_KEGG // GenMAPP /// G1_to_S_cell_cycle_Reactome // GenMAPP	chr1:68150743-68154017 (+) // 98.29 // p31.3
11727655_s_at	6.50268e-08	8.02602e-11	2.04783	1.03409	2.04783	up	667	DST	dystonin	0000226 // microtubule cytoskeleton organization // inferred from direct assay /// 0007010 // cytoskeleton organization // inferred from mutant phenotype /// 0007050 // cell cycle arrest // inferred from electronic annotation /// 0007155 // cell adhesion // inferred from electronic annotation /// 0007229 // integrin-mediated signaling pathway // non-traceable author statement /// 0008152 // metab…	0005604 // basement membrane // traceable author statement /// 0005634 // nucleus // inferred from direct assay /// 0005635 // nuclear envelope // inferred from electronic annotation /// 0005737 // cytoplasm // inferred from direct assay /// 0005737 // cytoplasm // inferred from sequence or structural similarity /// 0005783 // endoplasmic reticulum // inferred from electronic annotation /// 00057…	0003779 // actin binding // inferred from electronic annotation /// 0005178 // integrin binding // inferred from physical interaction /// 0005509 // calcium ion binding // inferred from electronic annotation /// 0005515 // protein binding // inferred from physical interaction /// 0008017 // microtubule binding // inferred from electronic annotation /// 0008022 // protein C-terminus binding // inf…	---	chr6:56479394-56507694 (-) // 99.54 // p12.1
11742988_s_at	6.50268e-08	8.13426e-11	1.44529	0.53136	1.44529	up	7430	EZR	ezrin	0000122 // negative regulation of transcription from RNA polymerase II promoter // inferred from mutant phenotype /// 0001951 // intestinal D-glucose absorption // inferred from electronic annotation /// 0003376 // sphingosine-1-phosphate signaling pathway // inferred from mutant phenotype /// 0007016 // cytoskeletal anchoring at plasma membrane // non-traceable author statement /// 0007159 // le…	0001726 // ruffle // inferred from direct assay /// 0001772 // immunological synapse // inferred from direct assay /// 0001931 // uropod // inferred from electronic annotation /// 0005615 // extracellular space // inferred from direct assay /// 0005622 // intracellular // inferred from electronic annotation /// 0005730 // nucleolus // inferred from direct assay /// 0005737 // cytoplasm // inferre…	0003779 // actin binding // inferred from direct assay /// 0005515 // protein binding // inferred from physical interaction /// 0008017 // microtubule binding // inferred from mutant phenotype /// 0008092 // cytoskeletal protein binding // inferred from electronic annotation /// 0019904 // protein domain specific binding // inferred from physical interaction /// 0032403 // protein complex binding…	---	chr6:159186779-159239340 (-) // 85.67 // q25.3
11759510_x_at	6.50268e-08	8.16208e-11	-1.67532	-0.744433	1.67532	down	4173	MCM4	minichromosome maintenance complex component 4	0000082 // G1/S transition of mitotic cell cycle // traceable author statement /// 0000278 // mitotic cell cycle // traceable author statement /// 0006260 // DNA replication // non-traceable author statement /// 0006260 // DNA replication // traceable author statement /// 0006268 // DNA unwinding involved in DNA replication // inferred from electronic annotation /// 0006270 // DNA replication ini…	0000784 // nuclear chromosome, telomeric region // inferred from direct assay /// 0005634 // nucleus // non-traceable author statement /// 0005654 // nucleoplasm // inferred from direct assay /// 0005654 // nucleoplasm // traceable author statement /// 0016020 // membrane // inferred from direct assay /// 0042555 // MCM complex // inferred from direct assay	0000166 // nucleotide binding // inferred from electronic annotation /// 0003677 // DNA binding // inferred from electronic annotation /// 0003678 // DNA helicase activity // inferred from electronic annotation /// 0003697 // single-stranded DNA binding // inferred from electronic annotation /// 0004003 // ATP-dependent DNA helicase activity // inferred from direct assay /// 0004386 // helicase a…	Cell_cycle_KEGG // GenMAPP /// DNA_replication_Reactome // GenMAPP /// G1_to_S_cell_cycle_Reactome // GenMAPP	chr8:48872762-48891078 (+) // 82.81 // q11.21
11720474_a_at	6.51082e-08	8.30411e-11	-1.6154	-0.691895	1.6154	down	6421 /// 654780	SFPQ /// SFPQ	splicing factor proline/glutamine-rich /// splicing factor proline/glutamine-rich	0000122 // negative regulation of transcription from RNA polymerase II promoter // inferred from direct assay /// 0000122 // negative regulation of transcription from RNA polymerase II promoter // inferred from genetic interaction /// 0000122 // negative regulation of transcription from RNA polymerase II promoter // inferred from mutant phenotype /// 0000380 // alternative mRNA splicing, via spli…	0000785 // chromatin // inferred from direct assay /// 0005634 // nucleus // inferred from direct assay /// 0005654 // nucleoplasm // inferred from direct assay /// 0005737 // cytoplasm // inferred from electronic annotation /// 0016363 // nuclear matrix // inferred from direct assay /// 0042382 // paraspeckles // inferred from direct assay /// 0090575 // RNA polymerase II transcription factor co…	0000166 // nucleotide binding // inferred from electronic annotation /// 0000976 // transcription regulatory region sequence-specific DNA binding // not recorded /// 0000976 // transcription regulatory region sequence-specific DNA binding // inferred from sequence or structural similarity /// 0000980 // RNA polymerase II distal enhancer sequence-specific DNA binding // inferred from sequence or s…	---	chr1:35647906-35658982 (-) // 83.81 // p34.3
11744030_a_at	6.64092e-08	8.64657e-11	2.74699	1.45785	2.74699	up	4316	MMP7	matrix metallopeptidase 7	0002779 // antibacterial peptide secretion // inferred from electronic annotation /// 0002780 // antibacterial peptide biosynthetic process // inferred from electronic annotation /// 0006508 // proteolysis // inferred from electronic annotation /// 0007568 // aging // inferred from electronic annotation /// 0022617 // extracellular matrix disassembly // traceable author statement /// 0030198 // e…	0005576 // extracellular region // traceable author statement /// 0005578 // proteinaceous extracellular matrix // inferred from electronic annotation /// 0005615 // extracellular space // inferred from electronic annotation /// 0009986 // cell surface // inferred from electronic annotation /// 0031012 // extracellular matrix // inferred from electronic annotation /// 0070062 // extracellular exo…	0004222 // metalloendopeptidase activity // inferred from electronic annotation /// 0008201 // heparin binding // inferred from electronic annotation /// 0008233 // peptidase activity // inferred from electronic annotation /// 0008237 // metallopeptidase activity // inferred from electronic annotation /// 0008270 // zinc ion binding // inferred from electronic annotation /// 0016787 // hydrolase …	Matrix_Metalloproteinases // GenMAPP	chr11:102391238-102401483 (-) // 83.18 // q22.2
11758355_s_at	6.64092e-08	8.73894e-11	1.40201	0.487493	1.40201	up	1364	CLDN4	claudin 4	0007165 // signal transduction // traceable author statement /// 0007565 // female pregnancy // inferred from electronic annotation /// 0007623 // circadian rhythm // inferred from electronic annotation /// 0016338 // calcium-independent cell-cell adhesion via plasma membrane cell-adhesion molecules // inferred from sequence or structural similarity /// 0032570 // response to progesterone // infe…	0005886 // plasma membrane // traceable author statement /// 0005887 // integral component of plasma membrane // inferred from mutant phenotype /// 0005923 // bicellular tight junction // inferred from direct assay /// 0005923 // bicellular tight junction // inferred from sequence or structural similarity /// 0009925 // basal plasma membrane // inferred from electronic annotation /// 0016020 // m…	0004888 // transmembrane signaling receptor activity // traceable author statement /// 0005198 // structural molecule activity // inferred from electronic annotation /// 0005515 // protein binding // inferred from electronic annotation /// 0042802 // identical protein binding // inferred from sequence or structural similarity	---	chr11:75110562-75112774 (+) // 53.63 // q13.4
11715847_x_at	6.68423e-08	8.93126e-11	2.23505	1.16031	2.23505	up	5327	PLAT	plasminogen activator, tissue	0001666 // response to hypoxia // inferred from electronic annotation /// 0006464 // cellular protein modification process // traceable author statement /// 0006508 // proteolysis // traceable author statement /// 0007596 // blood coagulation // traceable author statement /// 0014909 // smooth muscle cell migration // not recorded /// 0031639 // plasminogen activation // inferred from direct assa…	0005576 // extracellular region // traceable author statement /// 0005615 // extracellular space // not recorded /// 0005737 // cytoplasm // inferred from direct assay /// 0009986 // cell surface // inferred from direct assay /// 0030141 // secretory granule // inferred from electronic annotation /// 0031012 // extracellular matrix // inferred from direct assay /// 0045177 // apical part of cell …	0001948 // glycoprotein binding // traceable author statement /// 0004252 // serine-type endopeptidase activity // inferred from direct assay /// 0004252 // serine-type endopeptidase activity // traceable author statement /// 0005102 // receptor binding // inferred from physical interaction /// 0005515 // protein binding // inferred from physical interaction /// 0008233 // peptidase activity // i…	Blood_Clotting_Cascade // GenMAPP	chr8:42031913-42065242 (-) // 99.02 // p11.21
11717326_at	6.96051e-08	9.44132e-11	1.85879	0.894367	1.85879	up	687	KLF9	Kruppel-like factor 9	0006351 // transcription, DNA-templated // inferred from electronic annotation /// 0006355 // regulation of transcription, DNA-templated // inferred from electronic annotation /// 0006357 // regulation of transcription from RNA polymerase II promoter // traceable author statement /// 0007566 // embryo implantation // inferred from electronic annotation /// 0007623 // circadian rhythm // inferred …	0005634 // nucleus // inferred from direct assay /// 0005654 // nucleoplasm // inferred from direct assay /// 0005737 // cytoplasm // inferred from direct assay /// 0005886 // plasma membrane // inferred from direct assay	0003676 // nucleic acid binding // inferred from electronic annotation /// 0003677 // DNA binding // inferred from electronic annotation /// 0003700 // transcription factor activity, sequence-specific DNA binding // traceable author statement /// 0046872 // metal ion binding // inferred from electronic annotation	Circadian_Exercise // GenMAPP	chr9:72999512-73029573 (-) // 95.75 // q21.12
11715766_a_at	7.11438e-08	9.79406e-11	1.94414	0.95913	1.94414	up	1843	DUSP1	dual specificity phosphatase 1	0000188 // inactivation of MAPK activity // inferred from sequence or structural similarity /// 0001706 // endoderm formation // not recorded /// 0006470 // protein dephosphorylation // not recorded /// 0006979 // response to oxidative stress // traceable author statement /// 0007049 // cell cycle // inferred from electronic annotation /// 0009416 // response to light stimulus // inferred from el…	0005634 // nucleus // inferred from direct assay /// 0005737 // cytoplasm // inferred from direct assay	0004721 // phosphoprotein phosphatase activity // inferred from electronic annotation /// 0004725 // protein tyrosine phosphatase activity // inferred from electronic annotation /// 0004726 // non-membrane spanning protein tyrosine phosphatase activity // traceable author statement /// 0005515 // protein binding // inferred from physical interaction /// 0008138 // protein tyrosine/serine/threonin…	---	chr5:172194666-172198198 (-) // 89.68 // q35.1
11721917_a_at	7.29287e-08	1.01874e-10	2.57411	1.36407	2.57411	up	353322	ANKRD37	ankyrin repeat domain 37	---	0005634 // nucleus // inferred from electronic annotation /// 0005737 // cytoplasm // inferred from electronic annotation	0005515 // protein binding // inferred from electronic annotation	---	chr4:186317637-186321465 (+) // 93.74 // q35.1
11737349_a_at	7.95205e-08	1.12692e-10	1.77425	0.827213	1.77425	up	26281	FGF20	fibroblast growth factor 20	0000165 // MAPK cascade // traceable author statement /// 0000186 // activation of MAPKK activity // traceable author statement /// 0007165 // signal transduction // traceable author statement /// 0007173 // epidermal growth factor receptor signaling pathway // traceable author statement /// 0007264 // small GTPase mediated signal transduction // traceable author statement /// 0007265 // Ras prot…	0005576 // extracellular region // traceable author statement /// 0005622 // intracellular // traceable author statement	0005102 // receptor binding // inferred from electronic annotation /// 0005104 // fibroblast growth factor receptor binding // inferred from electronic annotation /// 0008083 // growth factor activity // inferred from electronic annotation	---	chr8:16850126-16860353 (-) // 93.22 // p22
11754026_a_at	8.54655e-08	1.22847e-10	2.24241	1.16505	2.24241	up	3576	CXCL8	chemokine (C-X-C motif) ligand 8	0001525 // angiogenesis // traceable author statement /// 0002237 // response to molecule of bacterial origin // inferred from direct assay /// 0006928 // movement of cell or subcellular component // traceable author statement /// 0006935 // chemotaxis // traceable author statement /// 0006954 // inflammatory response // traceable author statement /// 0006955 // immune response // not recorded //…	0005576 // extracellular region // traceable author statement /// 0005615 // extracellular space // inferred from electronic annotation /// 0005622 // intracellular // inferred from direct assay /// 0005622 // intracellular // traceable author statement	0005125 // cytokine activity // inferred from electronic annotation /// 0005153 // interleukin-8 receptor binding // inferred from physical interaction /// 0005515 // protein binding // inferred from physical interaction /// 0008009 // chemokine activity // traceable author statement	---	chr4:74606280-74608177 (+) // 70.26 // q13.3
11736962_a_at	8.60488e-08	1.25428e-10	1.68299	0.751022	1.68299	up	10150	MBNL2	muscleblind-like splicing regulator 2	0006397 // mRNA processing // inferred from electronic annotation /// 0008380 // RNA splicing // inferred from electronic annotation /// 0043484 // regulation of RNA splicing // inferred from direct assay	0005634 // nucleus // inferred from electronic annotation /// 0005737 // cytoplasm // inferred from electronic annotation	0003723 // RNA binding // inferred from electronic annotation /// 0044822 // poly(A) RNA binding // inferred from direct assay /// 0046872 // metal ion binding // inferred from electronic annotation	---	chr13:97874573-98046367 (+) // 95.29 // q32.1
11756431_s_at	9.0491e-08	1.33735e-10	1.53156	0.615	1.53156	up	10628	TXNIP	thioredoxin interacting protein	0000122 // negative regulation of transcription from RNA polymerase II promoter // inferred from electronic annotation /// 0006351 // transcription, DNA-templated // inferred from electronic annotation /// 0006355 // regulation of transcription, DNA-templated // inferred from electronic annotation /// 0006606 // protein import into nucleus // inferred from electronic annotation /// 0006979 // res…	0005634 // nucleus // inferred from electronic annotation /// 0005737 // cytoplasm // inferred from direct assay /// 0005758 // mitochondrial intermembrane space // inferred from electronic annotation /// 0005829 // cytosol // traceable author statement	0004857 // enzyme inhibitor activity // inferred from electronic annotation /// 0005515 // protein binding // inferred from physical interaction /// 0031625 // ubiquitin protein ligase binding // inferred from physical interaction	---	chr1:145438510-145442592 (+) // 99.88 // q21.1
11763539_a_at	9.58233e-08	1.43555e-10	1.58759	0.666843	1.58759	up	11202	KLK8	kallikrein related peptidase 8	0006508 // proteolysis // not recorded /// 0007613 // memory // not recorded /// 0007613 // memory // inferred from sequence or structural similarity /// 0008219 // cell death // inferred from sequence or structural similarity /// 0009611 // response to wounding // inferred from sequence or structural similarity /// 0031642 // negative regulation of myelination // inferred from sequence or struct…	0005576 // extracellular region // inferred from electronic annotation /// 0005615 // extracellular space // not recorded /// 0005615 // extracellular space // inferred from sequence or structural similarity /// 0005737 // cytoplasm // inferred from direct assay /// 0030141 // secretory granule // not recorded	0004252 // serine-type endopeptidase activity // inferred from direct assay /// 0005515 // protein binding // inferred from physical interaction /// 0008233 // peptidase activity // inferred from electronic annotation /// 0008236 // serine-type peptidase activity // inferred from electronic annotation /// 0016787 // hydrolase activity // inferred from electronic annotation	---	chr19:51499273-51507085 (-) // 99.93 // q13.41
11757376_s_at	1.05161e-07	1.59674e-10	-1.47308	-0.558832	1.47308	down	4144	MAT2A	methionine adenosyltransferase II, alpha	0006556 // S-adenosylmethionine biosynthetic process // inferred from direct assay /// 0006556 // S-adenosylmethionine biosynthetic process // inferred from electronic annotation /// 0006730 // one-carbon metabolic process // inferred from electronic annotation /// 0006805 // xenobiotic metabolic process // traceable author statement /// 0032259 // methylation // traceable author statement /// 00…	0005829 // cytosol // not recorded /// 0005829 // cytosol // traceable author statement /// 0048269 // methionine adenosyltransferase complex // inferred from direct assay	0000166 // nucleotide binding // inferred from electronic annotation /// 0004478 // methionine adenosyltransferase activity // inferred from direct assay /// 0005515 // protein binding // inferred from physical interaction /// 0005524 // ATP binding // inferred from electronic annotation /// 0016740 // transferase activity // inferred from electronic annotation /// 0046872 // metal ion binding //…	METHIONINE-DEG1-PWY // HumanCyc /// PWY-5041 // HumanCyc /// SAM-PWY // HumanCyc	chr2:85771916-85772397 (+) // 78.21 // p11.2
11724509_a_at	1.05607e-07	1.62489e-10	1.66477	0.735325	1.66477	up	5366	PMAIP1	phorbol-12-myristate-13-acetate-induced protein 1	0001836 // release of cytochrome c from mitochondria // inferred from electronic annotation /// 0006915 // apoptotic process // inferred from mutant phenotype /// 0006915 // apoptotic process // traceable author statement /// 0006919 // activation of cysteine-type endopeptidase activity involved in apoptotic process // inferred from electronic annotation /// 0006974 // cellular response to DNA da…	0005634 // nucleus // inferred from direct assay /// 0005739 // mitochondrion // inferred from direct assay /// 0005741 // mitochondrial outer membrane // traceable author statement /// 0005829 // cytosol // inferred from direct assay /// 0005829 // cytosol // traceable author statement	0005515 // protein binding // inferred from physical interaction	---	chr18:57567179-57571537 (+) // 98.48 // q21.32
11723663_a_at	1.11643e-07	1.74036e-10	-1.41055	-0.49626	1.41055	down	3192	HNRNPU	heterogeneous nuclear ribonucleoprotein U (scaffold attachment factor A)	0000398 // mRNA splicing, via spliceosome // inferred by curator /// 0000398 // mRNA splicing, via spliceosome // traceable author statement /// 0001649 // osteoblast differentiation // inferred from direct assay /// 0006396 // RNA processing // traceable author statement /// 0006397 // mRNA processing // inferred from electronic annotation /// 0008380 // RNA splicing // traceable author statemen…	0005634 // nucleus // inferred from direct assay /// 0005654 // nucleoplasm // inferred from direct assay /// 0005654 // nucleoplasm // traceable author statement /// 0005681 // spliceosomal complex // inferred from electronic annotation /// 0005697 // telomerase holoenzyme complex // inferred from direct assay /// 0005737 // cytoplasm // inferred from electronic annotation /// 0009986 // cell su…	0000166 // nucleotide binding // inferred from electronic annotation /// 0001047 // core promoter binding // inferred from sequence or structural similarity /// 0003677 // DNA binding // traceable author statement /// 0003723 // RNA binding // traceable author statement /// 0005515 // protein binding // inferred from physical interaction /// 0005524 // ATP binding // inferred from electronic anno…	mRNA_processing_Reactome // GenMAPP	chr1:245013601-245027827 (-) // 97.17 // q44
11763173_s_at	1.11964e-07	1.78579e-10	1.69959	0.76519	1.69959	up	5238	PGM3	phosphoglucomutase 3	0005975 // carbohydrate metabolic process // inferred from electronic annotation /// 0006041 // glucosamine metabolic process // non-traceable author statement /// 0006048 // UDP-N-acetylglucosamine biosynthetic process // inferred from electronic annotation /// 0006048 // UDP-N-acetylglucosamine biosynthetic process // inferred from mutant phenotype /// 0006048 // UDP-N-acetylglucosamine biosynt…	0005829 // cytosol // not recorded /// 0005829 // cytosol // traceable author statement	0000287 // magnesium ion binding // inferred from electronic annotation /// 0004610 // phosphoacetylglucosamine mutase activity // inferred from direct assay /// 0004610 // phosphoacetylglucosamine mutase activity // inferred from mutant phenotype /// 0004614 // phosphoglucomutase activity // inferred from electronic annotation /// 0016853 // isomerase activity // inferred from electronic annotat…	PWY-5514 // HumanCyc /// UDPNACETYLGALSYN-PWY // HumanCyc	chr6:83875908-83903633 (-) // 75.49 // q14.1
11739403_at	1.11964e-07	1.7907e-10	-1.96585	-0.975152	1.96585	down	51111	KMT5B	lysine (K)-specific methyltransferase 5B	0006351 // transcription, DNA-templated // inferred from electronic annotation /// 0006355 // regulation of transcription, DNA-templated // inferred from electronic annotation /// 0007517 // muscle organ development // inferred from electronic annotation /// 0016568 // chromatin modification // inferred from electronic annotation /// 0016571 // histone methylation // inferred from electronic anno…	0000780 // condensed nuclear chromosome, centromeric region // inferred from electronic annotation /// 0005634 // nucleus // inferred from electronic annotation /// 0005694 // chromosome // inferred from electronic annotation	0005515 // protein binding // inferred from electronic annotation /// 0008168 // methyltransferase activity // inferred from electronic annotation /// 0016740 // transferase activity // inferred from electronic annotation /// 0018024 // histone-lysine N-methyltransferase activity // inferred from direct assay /// 0042799 // histone methyltransferase activity (H4-K20 specific) // inferred from ele…	---	chr11:67923087-67980800 (-) // 97.94 // q13.2
11753829_a_at	1.15758e-07	1.87482e-10	1.72553	0.787042	1.72553	up	5327	PLAT	plasminogen activator, tissue	0001666 // response to hypoxia // inferred from electronic annotation /// 0006464 // cellular protein modification process // traceable author statement /// 0006508 // proteolysis // traceable author statement /// 0007596 // blood coagulation // traceable author statement /// 0014909 // smooth muscle cell migration // not recorded /// 0031639 // plasminogen activation // inferred from direct assa…	0005576 // extracellular region // traceable author statement /// 0005615 // extracellular space // not recorded /// 0005737 // cytoplasm // inferred from direct assay /// 0009986 // cell surface // inferred from direct assay /// 0030141 // secretory granule // inferred from electronic annotation /// 0031012 // extracellular matrix // inferred from direct assay /// 0045177 // apical part of cell …	0001948 // glycoprotein binding // traceable author statement /// 0004252 // serine-type endopeptidase activity // inferred from direct assay /// 0004252 // serine-type endopeptidase activity // traceable author statement /// 0005102 // receptor binding // inferred from physical interaction /// 0005515 // protein binding // inferred from physical interaction /// 0008233 // peptidase activity // i…	Blood_Clotting_Cascade // GenMAPP	chr8:42039459-42040409 (-) // 80.59 // p11.21
11751817_x_at	1.16737e-07	1.91431e-10	1.6955	0.76171	1.6955	up	10150	MBNL2	muscleblind-like splicing regulator 2	0006397 // mRNA processing // inferred from electronic annotation /// 0008380 // RNA splicing // inferred from electronic annotation /// 0043484 // regulation of RNA splicing // inferred from direct assay	0005634 // nucleus // inferred from electronic annotation /// 0005737 // cytoplasm // inferred from electronic annotation	0003723 // RNA binding // inferred from electronic annotation /// 0044822 // poly(A) RNA binding // inferred from direct assay /// 0046872 // metal ion binding // inferred from electronic annotation	---	chr13:97928457-98043867 (+) // 100.0 // q32.1
11742990_x_at	1.18828e-07	1.97264e-10	1.44803	0.534087	1.44803	up	7430	EZR	ezrin	0000122 // negative regulation of transcription from RNA polymerase II promoter // inferred from mutant phenotype /// 0001951 // intestinal D-glucose absorption // inferred from electronic annotation /// 0002066 // columnar/cuboidal epithelial cell development // inferred from sequence or structural similarity /// 0002066 // columnar/cuboidal epithelial cell development // inferred from electroni…	0001726 // ruffle // inferred from direct assay /// 0001772 // immunological synapse // inferred from direct assay /// 0001931 // uropod // inferred from electronic annotation /// 0005615 // extracellular space // inferred from direct assay /// 0005622 // intracellular // inferred from electronic annotation /// 0005730 // nucleolus // inferred from direct assay /// 0005737 // cytoplasm // inferre…	0000166 // nucleotide binding // inferred from electronic annotation /// 0003779 // actin binding // inferred from direct assay /// 0004672 // protein kinase activity // inferred from electronic annotation /// 0004713 // protein tyrosine kinase activity // inferred from direct assay /// 0004713 // protein tyrosine kinase activity // inferred from electronic annotation /// 0004714 // transmembrane…	---	chr6:159186779-159239340 (-) // 85.67 // q25.3
11758683_s_at	1.21899e-07	2.04831e-10	-1.51853	-0.602672	1.51853	down	23338	JADE2	jade family PHD finger 2	0043966 // histone H3 acetylation // inferred from direct assay /// 0043981 // histone H4-K5 acetylation // inferred from direct assay /// 0043982 // histone H4-K8 acetylation // inferred from direct assay /// 0043983 // histone H4-K12 acetylation // inferred from direct assay /// 0043984 // histone H4-K16 acetylation // inferred from direct assay /// 0060395 // SMAD protein signal transduction /…	0000123 // histone acetyltransferase complex // inferred from direct assay /// 0005654 // nucleoplasm // inferred from direct assay /// 0070062 // extracellular exosome // inferred from direct assay	0005515 // protein binding // inferred from physical interaction /// 0008270 // zinc ion binding // inferred from electronic annotation /// 0046872 // metal ion binding // inferred from electronic annotation	---	chr5:133918617-133918874 (+) // 100.0 // q31.1
11748223_a_at	1.23261e-07	2.09614e-10	1.91106	0.934373	1.91106	up	200879	LIPH	lipase, member H	0006629 // lipid metabolic process // inferred from electronic annotation /// 0008152 // metabolic process // inferred from electronic annotation /// 0016042 // lipid catabolic process // inferred from direct assay	0005576 // extracellular region // inferred from electronic annotation /// 0005615 // extracellular space // inferred from direct assay /// 0005886 // plasma membrane // inferred from direct assay /// 0016020 // membrane // inferred from electronic annotation	0004620 // phospholipase activity // inferred from direct assay /// 0008201 // heparin binding // inferred from direct assay /// 0016787 // hydrolase activity // inferred from electronic annotation /// 0052689 // carboxylic ester hydrolase activity // inferred from electronic annotation	LIPAS-PWY // HumanCyc /// Statin_Pathway_PharmGKB // GenMAPP	chr3:185226312-185270341 (-) // 99.67 // q27.2
11739175_a_at	1.23628e-07	2.15131e-10	-1.4915	-0.576762	1.4915	down	4670	HNRNPM	heterogeneous nuclear ribonucleoprotein M	0000380 // alternative mRNA splicing, via spliceosome // inferred from mutant phenotype /// 0000398 // mRNA splicing, via spliceosome // inferred by curator /// 0000398 // mRNA splicing, via spliceosome // traceable author statement /// 0006397 // mRNA processing // inferred from electronic annotation /// 0008380 // RNA splicing // traceable author statement /// 0010467 // gene expression // trac…	0005634 // nucleus // inferred from electronic annotation /// 0005654 // nucleoplasm // inferred from direct assay /// 0005654 // nucleoplasm // traceable author statement /// 0005681 // spliceosomal complex // inferred from direct assay /// 0005730 // nucleolus // inferred from electronic annotation /// 0005887 // integral component of plasma membrane // traceable author statement /// 0016020 //…	0000166 // nucleotide binding // inferred from electronic annotation /// 0003676 // nucleic acid binding // inferred from electronic annotation /// 0003723 // RNA binding // non-traceable author statement /// 0003823 // antigen binding // inferred from electronic annotation /// 0005515 // protein binding // inferred from physical interaction /// 0019904 // protein domain specific binding // infer…	---	chr19:8509650-8553994 (+) // 96.13 // p13.2
11758446_s_at	1.23628e-07	2.15245e-10	1.42432	0.510273	1.42432	up	8848	TSC22D1	TSC22 domain family member 1	0006351 // transcription, DNA-templated // inferred from electronic annotation /// 0006355 // regulation of transcription, DNA-templated // inferred from electronic annotation /// 0006366 // transcription from RNA polymerase II promoter // traceable author statement /// 0008284 // positive regulation of cell proliferation // inferred from electronic annotation /// 0043065 // positive regulation o…	0005634 // nucleus // inferred from electronic annotation /// 0005737 // cytoplasm // inferred from electronic annotation	0003700 // transcription factor activity, sequence-specific DNA binding // inferred from electronic annotation /// 0005515 // protein binding // inferred from physical interaction	---	chr13:45008591-45009020 (-) // 87.53 // q14.11
11726812_a_at	1.36375e-07	2.40198e-10	2.11322	1.07944	2.11322	up	7031	TFF1	trefoil factor 1	0005975 // carbohydrate metabolic process // traceable author statement /// 0007586 // digestion // non-traceable author statement /// 0008285 // negative regulation of cell proliferation // inferred from electronic annotation /// 0010039 // response to iron ion // inferred from electronic annotation /// 0030154 // cell differentiation // inferred from electronic annotation /// 0030277 // mainten…	0005576 // extracellular region // inferred from electronic annotation /// 0005615 // extracellular space // inferred from electronic annotation	0005515 // protein binding // inferred from physical interaction /// 0008083 // growth factor activity // inferred from electronic annotation	---	chr21:43782390-43786644 (-) // 60.44 // q22.3
11754337_s_at	1.36525e-07	2.43227e-10	1.75816	0.81407	1.75816	up	10397	NDRG1	N-myc downstream regulated 1	0008285 // negative regulation of cell proliferation // inferred from electronic annotation /// 0010038 // response to metal ion // traceable author statement /// 0030330 // DNA damage response, signal transduction by p53 class mediator // inferred from expression pattern /// 0032287 // peripheral nervous system myelin maintenance // inferred from electronic annotation /// 0042127 // regulation o…	0005634 // nucleus // inferred from direct assay /// 0005737 // cytoplasm // inferred from direct assay /// 0005813 // centrosome // inferred from direct assay /// 0005815 // microtubule organizing center // inferred from electronic annotation /// 0005829 // cytosol // inferred from electronic annotation /// 0005856 // cytoskeleton // inferred from electronic annotation /// 0005874 // microtubule…	0005515 // protein binding // inferred from physical interaction /// 0008017 // microtubule binding // inferred from direct assay /// 0017137 // Rab GTPase binding // inferred from direct assay /// 0043015 // gamma-tubulin binding // inferred from direct assay /// 0045296 // cadherin binding // inferred from direct assay	---	chr8:134249420-134250626 (-) // 89.41 // q24.22
11746350_a_at	1.39316e-07	2.51021e-10	1.62736	0.70253	1.62736	up	5292	PIM1	Pim-1 proto-oncogene, serine/threonine kinase	0006468 // protein phosphorylation // inferred from direct assay /// 0006915 // apoptotic process // inferred from electronic annotation /// 0007049 // cell cycle // inferred from electronic annotation /// 0007275 // multicellular organismal development // traceable author statement /// 0007346 // regulation of mitotic cell cycle // not recorded /// 0008283 // cell proliferation // inferred from …	0005634 // nucleus // inferred from electronic annotation /// 0005737 // cytoplasm // inferred from direct assay /// 0005886 // plasma membrane // inferred from electronic annotation /// 0016020 // membrane // inferred from electronic annotation	0000166 // nucleotide binding // inferred from electronic annotation /// 0004672 // protein kinase activity // inferred from electronic annotation /// 0004674 // protein serine/threonine kinase activity // inferred from direct assay /// 0005515 // protein binding // inferred from physical interaction /// 0005524 // ATP binding // inferred from direct assay /// 0008134 // transcription factor bind…	---	chr6:37140223-37142723 (+) // 99.61 // p21.2
11727470_x_at	1.39657e-07	2.54462e-10	-1.58219	-0.661925	1.58219	down	27300	ZNF544	zinc finger protein 544	0006351 // transcription, DNA-templated // inferred from electronic annotation /// 0006355 // regulation of transcription, DNA-templated // not recorded	0005622 // intracellular // inferred from electronic annotation /// 0005634 // nucleus // inferred from electronic annotation	0003676 // nucleic acid binding // inferred from electronic annotation /// 0003677 // DNA binding // inferred from electronic annotation /// 0003700 // transcription factor activity, sequence-specific DNA binding // not recorded /// 0005515 // protein binding // inferred from physical interaction /// 0046872 // metal ion binding // inferred from electronic annotation	---	chr19:58740046-58775164 (+) // 77.79 // q13.43
11738159_x_at	1.46534e-07	2.69958e-10	1.77198	0.825365	1.77198	up	125965	COX6B2	cytochrome c oxidase subunit VIb polypeptide 2 (testis)	1902600 // hydrogen ion transmembrane transport // inferred from electronic annotation	0005739 // mitochondrion // inferred from electronic annotation /// 0005758 // mitochondrial intermembrane space // inferred from electronic annotation /// 0030061 // mitochondrial crista // inferred from direct assay	0004129 // cytochrome-c oxidase activity // inferred from electronic annotation /// 0005515 // protein binding // inferred from physical interaction	---	chr19:55861070-55866182 (-) // 63.6 // q13.42
11757900_a_at	1.46631e-07	2.73105e-10	-1.49989	-0.584857	1.49989	down	7448	VTN	vitronectin	0006898 // receptor-mediated endocytosis // inferred from electronic annotation /// 0006955 // immune response // traceable author statement /// 0007155 // cell adhesion // traceable author statement /// 0007160 // cell-matrix adhesion // inferred from direct assay /// 0010811 // positive regulation of cell-substrate adhesion // inferred from electronic annotation /// 0010951 // negative regulati…	0005576 // extracellular region // non-traceable author statement /// 0005576 // extracellular region // traceable author statement /// 0005578 // proteinaceous extracellular matrix // inferred from electronic annotation /// 0005615 // extracellular space // inferred from direct assay /// 0031012 // extracellular matrix // inferred from direct assay /// 0031012 // extracellular matrix // inferred…	0005044 // scavenger receptor activity // inferred from electronic annotation /// 0005178 // integrin binding // inferred from direct assay /// 0005178 // integrin binding // inferred from physical interaction /// 0005515 // protein binding // inferred from physical interaction /// 0008201 // heparin binding // inferred from electronic annotation /// 0030247 // polysaccharide binding // inferred …	Inflammatory_Response_Pathway // GenMAPP	chr17:26694305-26694974 (-) // 96.45 // q11.2
11731579_a_at	1.53903e-07	2.89766e-10	1.61544	0.691927	1.61544	up	27076	LYPD3	LY6/PLAUR domain containing 3	0007160 // cell-matrix adhesion // not recorded	0005615 // extracellular space // inferred from direct assay /// 0005886 // plasma membrane // inferred from electronic annotation /// 0016020 // membrane // inferred from electronic annotation /// 0016021 // integral component of membrane // inferred from electronic annotation /// 0031225 // anchored component of membrane // inferred from electronic annotation /// 0046658 // anchored component o…	0043236 // laminin binding // not recorded	---	chr19:43964941-43969831 (-) // 88.56 // q13.31
11755565_x_at	1.53922e-07	2.92918e-10	1.71015	0.774125	1.71015	up	11202	KLK8	kallikrein related peptidase 8	0006508 // proteolysis // not recorded /// 0007613 // memory // not recorded /// 0007613 // memory // inferred from sequence or structural similarity /// 0008219 // cell death // inferred from sequence or structural similarity /// 0009611 // response to wounding // inferred from sequence or structural similarity /// 0031642 // negative regulation of myelination // inferred from sequence or struct…	0005576 // extracellular region // inferred from electronic annotation /// 0005615 // extracellular space // not recorded /// 0005615 // extracellular space // inferred from sequence or structural similarity /// 0005737 // cytoplasm // inferred from direct assay /// 0030141 // secretory granule // not recorded	0004252 // serine-type endopeptidase activity // inferred from direct assay /// 0005515 // protein binding // inferred from physical interaction /// 0008233 // peptidase activity // inferred from electronic annotation /// 0008236 // serine-type peptidase activity // inferred from electronic annotation /// 0016787 // hydrolase activity // inferred from electronic annotation	---	chr19:51499273-51507085 (-) // 99.93 // q13.41
11731283_a_at	1.61122e-07	3.09882e-10	1.65404	0.72599	1.65404	up	11202	KLK8	kallikrein related peptidase 8	0006508 // proteolysis // not recorded /// 0007613 // memory // not recorded /// 0007613 // memory // inferred from sequence or structural similarity /// 0008219 // cell death // inferred from sequence or structural similarity /// 0009611 // response to wounding // inferred from sequence or structural similarity /// 0031642 // negative regulation of myelination // inferred from sequence or struct…	0005576 // extracellular region // inferred from electronic annotation /// 0005615 // extracellular space // not recorded /// 0005615 // extracellular space // inferred from sequence or structural similarity /// 0005737 // cytoplasm // inferred from direct assay /// 0030141 // secretory granule // not recorded	0004252 // serine-type endopeptidase activity // inferred from direct assay /// 0005515 // protein binding // inferred from physical interaction /// 0008233 // peptidase activity // inferred from electronic annotation /// 0008236 // serine-type peptidase activity // inferred from electronic annotation /// 0016787 // hydrolase activity // inferred from electronic annotation	---	chr19:51499164-51504958 (-) // 95.89 // q13.41
11741012_a_at	1.63947e-07	3.20142e-10	1.3748	0.459225	1.3748	up	6307	MSMO1	methylsterol monooxygenase 1	0006629 // lipid metabolic process // inferred from electronic annotation /// 0006631 // fatty acid metabolic process // traceable author statement /// 0006633 // fatty acid biosynthetic process // inferred from electronic annotation /// 0006694 // steroid biosynthetic process // inferred from electronic annotation /// 0006695 // cholesterol biosynthetic process // traceable author statement /// …	0005783 // endoplasmic reticulum // traceable author statement /// 0005789 // endoplasmic reticulum membrane // traceable author statement /// 0005886 // plasma membrane // traceable author statement /// 0016020 // membrane // inferred from electronic annotation /// 0016021 // integral component of membrane // inferred from electronic annotation	0000254 // C-4 methylsterol oxidase activity // inferred from electronic annotation /// 0005506 // iron ion binding // inferred from electronic annotation /// 0016491 // oxidoreductase activity // inferred from electronic annotation	Cholesterol_Biosynthesis // GenMAPP /// PWY-6074 // MetaCyc /// PWY66-3 // HumanCyc /// PWY66-3 // MetaCyc /// PWY66-341 // HumanCyc /// PWY66-341 // MetaCyc /// PWY66-4 // HumanCyc /// PWY66-4 // MetaCyc	chr4:166248774-166264224 (+) // 82.61 // q32.3
11728882_a_at	1.63947e-07	3.21952e-10	-1.81222	-0.857755	1.81222	down	167681	PRSS35	protease, serine 35	0006508 // proteolysis // inferred from electronic annotation	0005576 // extracellular region // inferred from electronic annotation /// 0005739 // mitochondrion // inferred from electronic annotation	0004252 // serine-type endopeptidase activity // inferred from electronic annotation	---	chr6:84222054-84235423 (+) // 94.56 // q14.2
11754521_a_at	1.64527e-07	3.26422e-10	1.59207	0.670902	1.59207	up	10150	MBNL2	muscleblind-like splicing regulator 2	0006397 // mRNA processing // inferred from electronic annotation /// 0008380 // RNA splicing // inferred from electronic annotation /// 0043484 // regulation of RNA splicing // inferred from direct assay	0005634 // nucleus // inferred from electronic annotation /// 0005737 // cytoplasm // inferred from electronic annotation	0003723 // RNA binding // inferred from electronic annotation /// 0044822 // poly(A) RNA binding // inferred from direct assay /// 0046872 // metal ion binding // inferred from electronic annotation	---	chr13:97874548-98046367 (+) // 96.29 // q32.1
11752765_s_at	1.66738e-07	3.34186e-10	1.5796	0.659562	1.5796	up	10628	TXNIP	thioredoxin interacting protein	0000122 // negative regulation of transcription from RNA polymerase II promoter // inferred from electronic annotation /// 0006351 // transcription, DNA-templated // inferred from electronic annotation /// 0006355 // regulation of transcription, DNA-templated // inferred from electronic annotation /// 0006606 // protein import into nucleus // inferred from electronic annotation /// 0006979 // res…	0005634 // nucleus // inferred from electronic annotation /// 0005737 // cytoplasm // inferred from direct assay /// 0005758 // mitochondrial intermembrane space // inferred from electronic annotation /// 0005829 // cytosol // traceable author statement	0004857 // enzyme inhibitor activity // inferred from electronic annotation /// 0005515 // protein binding // inferred from physical interaction /// 0031625 // ubiquitin protein ligase binding // inferred from physical interaction	---	chr1:145438489-145442130 (+) // 99.81 // q21.1
11716520_at	1.68321e-07	3.40765e-10	2.24738	1.16824	2.24738	up	11067	C10orf10	chromosome 10 open reading frame 10	---	0005737 // cytoplasm // inferred from electronic annotation /// 0005739 // mitochondrion // inferred from direct assay	---	---	chr10:45471576-45474360 (-) // 91.47 // q11.21
11755851_a_at	1.69177e-07	3.45924e-10	1.47167	0.557453	1.47167	up	23352	UBR4	ubiquitin protein ligase E3 component n-recognin 4	0008152 // metabolic process // inferred from electronic annotation /// 0016032 // viral process // inferred from electronic annotation /// 0016567 // protein ubiquitination // inferred from electronic annotation /// 0042787 // protein ubiquitination involved in ubiquitin-dependent protein catabolic process // inferred from direct assay	0005634 // nucleus // inferred from electronic annotation /// 0005654 // nucleoplasm // inferred from direct assay /// 0005737 // cytoplasm // inferred from direct assay /// 0005813 // centrosome // inferred from direct assay /// 0005856 // cytoskeleton // inferred from electronic annotation /// 0016020 // membrane // inferred from direct assay /// 0016021 // integral component of membrane // inf…	0004842 // ubiquitin-protein transferase activity // inferred from direct assay /// 0005488 // binding // inferred from electronic annotation /// 0005515 // protein binding // inferred from physical interaction /// 0005516 // calmodulin binding // inferred from electronic annotation /// 0008270 // zinc ion binding // inferred from electronic annotation /// 0016874 // ligase activity // inferred f…	---	chr1:19401013-19426907 (-) // 98.34 // p36.13
11731661_s_at	1.70369e-07	3.5181e-10	1.53966	0.622607	1.53966	up	1628	DBP	D site of albumin promoter (albumin D-box) binding protein	0001568 // blood vessel development // inferred from electronic annotation /// 0001889 // liver development // inferred from electronic annotation /// 0003376 // sphingosine-1-phosphate signaling pathway // inferred from mutant phenotype /// 0006351 // transcription, DNA-templated // inferred from electronic annotation /// 0006355 // regulation of transcription, DNA-templated // inferred from ele…	0005634 // nucleus // inferred from electronic annotation /// 0005737 // cytoplasm // inferred from electronic annotation /// 0005764 // lysosome // inferred from electronic annotation /// 0005765 // lysosomal membrane // inferred from direct assay /// 0005765 // lysosomal membrane // inferred from electronic annotation /// 0005829 // cytosol // inferred from direct assay /// 0005829 // cytosol /…	0000166 // nucleotide binding // inferred from electronic annotation /// 0000977 // RNA polymerase II regulatory region sequence-specific DNA binding // inferred from direct assay /// 0001077 // transcriptional activator activity, RNA polymerase II core promoter proximal region sequence-specific binding // inferred from direct assay /// 0003677 // DNA binding // inferred from electronic annotatio…	S1P_Signaling // GenMAPP	chr19:49133817-49140639 (-) // 92.95 // q13.33
11720106_a_at	1.71858e-07	3.58363e-10	-1.79509	-0.844055	1.79509	down	1836	SLC26A2	solute carrier family 26 (anion exchanger), member 2	0001503 // ossification // inferred from electronic annotation /// 0005975 // carbohydrate metabolic process // traceable author statement /// 0006805 // xenobiotic metabolic process // traceable author statement /// 0006810 // transport // inferred from electronic annotation /// 0006811 // ion transport // traceable author statement /// 0008272 // sulfate transport // traceable author statement …	0005886 // plasma membrane // traceable author statement /// 0005887 // integral component of plasma membrane // traceable author statement /// 0016020 // membrane // traceable author statement /// 0016021 // integral component of membrane // inferred from electronic annotation /// 0070062 // extracellular exosome // inferred from direct assay	0005254 // chloride channel activity // not recorded /// 0008271 // secondary active sulfate transmembrane transporter activity // inferred from electronic annotation /// 0015106 // bicarbonate transmembrane transporter activity // not recorded /// 0015116 // sulfate transmembrane transporter activity // traceable author statement /// 0015301 // anion:anion antiporter activity // not recorded ///…	---	chr5:149340291-149366965 (+) // 90.33 // q32
11756626_s_at	1.84263e-07	3.87961e-10	-1.55116	-0.633345	1.55116	down	11130	ZWINT	ZW10 interacting kinetochore protein	0000070 // mitotic sister chromatid segregation // inferred from direct assay /// 0000278 // mitotic cell cycle // traceable author statement /// 0007049 // cell cycle // inferred from electronic annotation /// 0007067 // mitotic nuclear division // inferred from electronic annotation /// 0007093 // mitotic cell cycle checkpoint // inferred from direct assay /// 0007264 // small GTPase mediated s…	0000775 // chromosome, centromeric region // inferred from electronic annotation /// 0000776 // kinetochore // inferred from direct assay /// 0000777 // condensed chromosome kinetochore // inferred from electronic annotation /// 0005634 // nucleus // inferred from electronic annotation /// 0005694 // chromosome // inferred from electronic annotation /// 0005737 // cytoplasm // inferred from direc…	0005515 // protein binding // inferred from physical interaction /// 0047485 // protein N-terminus binding // inferred from physical interaction	---	chr10:58117239-58121026 (-) // 87.0 // q21.1
11737760_s_at	2.01003e-07	4.27277e-10	1.51066	0.595178	1.51066	up	390	RND3	Rho family GTPase 3	0007155 // cell adhesion // traceable author statement /// 0007165 // signal transduction // inferred from electronic annotation /// 0007264 // small GTPase mediated signal transduction // inferred from electronic annotation /// 0008152 // metabolic process // traceable author statement /// 0015031 // protein transport // inferred from electronic annotation /// 0030036 // actin cytoskeleton organ…	0000139 // Golgi membrane // inferred from electronic annotation /// 0005622 // intracellular // inferred from electronic annotation /// 0005794 // Golgi apparatus // inferred from electronic annotation /// 0005925 // focal adhesion // inferred from direct assay /// 0016020 // membrane // inferred from electronic annotation /// 0070062 // extracellular exosome // inferred from direct assay	0000166 // nucleotide binding // inferred from electronic annotation /// 0003924 // GTPase activity // traceable author statement /// 0005515 // protein binding // inferred from physical interaction /// 0005525 // GTP binding // inferred from electronic annotation	---	chr2:151324711-151344243 (-) // 99.1 // q23.3
11756583_a_at	2.32068e-07	4.988e-10	-2.15154	-1.10537	2.15154	down	2104	ESRRG	estrogen-related receptor gamma	0006351 // transcription, DNA-templated // inferred from electronic annotation /// 0006355 // regulation of transcription, DNA-templated // inferred from direct assay /// 0006366 // transcription from RNA polymerase II promoter // inferred from electronic annotation /// 0006367 // transcription initiation from RNA polymerase II promoter // traceable author statement /// 0010467 // gene expression…	0005634 // nucleus // inferred from electronic annotation /// 0005654 // nucleoplasm // traceable author statement	0000977 // RNA polymerase II regulatory region sequence-specific DNA binding // inferred from electronic annotation /// 0001228 // transcriptional activator activity, RNA polymerase II transcription regulatory region sequence-specific binding // inferred from electronic annotation /// 0003677 // DNA binding // inferred from electronic annotation /// 0003700 // transcription factor activity, seque…	---	chr1:216676595-217311096 (-) // 93.37 // q41
11724726_s_at	2.32068e-07	5.02708e-10	-1.50007	-0.585028	1.50007	down	1983	EIF5	eukaryotic translation initiation factor 5	0006412 // translation // traceable author statement /// 0006413 // translational initiation // non-traceable author statement /// 0006413 // translational initiation // traceable author statement /// 0006446 // regulation of translational initiation // inferred from direct assay /// 0010467 // gene expression // traceable author statement /// 0044267 // cellular protein metabolic process // trac…	0005634 // nucleus // inferred from direct assay /// 0005737 // cytoplasm // inferred from direct assay /// 0005829 // cytosol // non-traceable author statement /// 0005829 // cytosol // traceable author statement /// 0005886 // plasma membrane // inferred from direct assay	0000166 // nucleotide binding // inferred from electronic annotation /// 0003743 // translation initiation factor activity // non-traceable author statement /// 0003924 // GTPase activity // traceable author statement /// 0005488 // binding // inferred from electronic annotation /// 0005515 // protein binding // inferred from physical interaction /// 0005525 // GTP binding // inferred from electr…	Translation_Factors // GenMAPP	chr14:103800338-103811362 (+) // 90.52 // q32.32
11716049_a_at	2.32229e-07	5.07758e-10	1.68699	0.75445	1.68699	up	10221	TRIB1	tribbles pseudokinase 1	0006468 // protein phosphorylation // traceable author statement /// 0006469 // negative regulation of protein kinase activity // inferred from mutant phenotype /// 0007254 // JNK cascade // inferred from mutant phenotype /// 0014912 // negative regulation of smooth muscle cell migration // inferred from mutant phenotype /// 0031665 // negative regulation of lipopolysaccharide-mediated signaling …	0005634 // nucleus // inferred from direct assay /// 0005737 // cytoplasm // inferred from direct assay	0004672 // protein kinase activity // traceable author statement /// 0004860 // protein kinase inhibitor activity // inferred from mutant phenotype /// 0005524 // ATP binding // traceable author statement /// 0008134 // transcription factor binding // inferred from physical interaction /// 0016772 // transferase activity, transferring phosphorus-containing groups // inferred from electronic annot…	---	chr8:126442560-126450639 (+) // 90.44 // q24.13
11740481_x_at	2.38744e-07	5.27879e-10	2.39656	1.26097	2.39656	up	54852	PAQR5	progestin and adipoQ receptor family member V	0007275 // multicellular organismal development // inferred from electronic annotation /// 0030154 // cell differentiation // inferred from electronic annotation /// 0048477 // oogenesis // inferred from electronic annotation	0016020 // membrane // inferred from electronic annotation /// 0016021 // integral component of membrane // inferred from electronic annotation	0004872 // receptor activity // not recorded /// 0005496 // steroid binding // inferred from electronic annotation /// 0005515 // protein binding // inferred from physical interaction /// 0008289 // lipid binding // inferred from electronic annotation	---	chr15:69606741-69700089 (+) // 80.34 // q23
11758679_s_at	2.38744e-07	5.31671e-10	-1.60111	-0.679075	1.60111	down	10528	NOP56	NOP56 ribonucleoprotein	0000154 // rRNA modification // not recorded /// 0006364 // rRNA processing // traceable author statement /// 0042254 // ribosome biogenesis // inferred from electronic annotation	0005634 // nucleus // inferred from electronic annotation /// 0005654 // nucleoplasm // inferred from electronic annotation /// 0005730 // nucleolus // inferred from direct assay /// 0005732 // small nucleolar ribonucleoprotein complex // inferred from direct assay /// 0005737 // cytoplasm // inferred from electronic annotation /// 0016020 // membrane // inferred from direct assay /// 0030529 // …	0003723 // RNA binding // traceable author statement /// 0005515 // protein binding // inferred from physical interaction /// 0030515 // snoRNA binding // inferred from direct assay /// 0044822 // poly(A) RNA binding // inferred from direct assay /// 1990226 // histone methyltransferase binding // inferred from physical interaction	---	chr20:2637618-2637865 (+) // 93.21 // p13
11733962_a_at	2.45612e-07	5.52192e-10	-1.58427	-0.663818	1.58427	down	8549	LGR5	leucine-rich repeat containing G protein-coupled receptor 5	0001942 // hair follicle development // inferred from electronic annotation /// 0007165 // signal transduction // inferred from electronic annotation /// 0007186 // G-protein coupled receptor signaling pathway // inferred from electronic annotation /// 0009994 // oocyte differentiation // inferred from electronic annotation /// 0042127 // regulation of cell proliferation // inferred from electron…	0005794 // Golgi apparatus // inferred from electronic annotation /// 0005886 // plasma membrane // traceable author statement /// 0005887 // integral component of plasma membrane // inferred from direct assay /// 0016020 // membrane // inferred from electronic annotation /// 0016021 // integral component of membrane // inferred from electronic annotation /// 0032588 // trans-Golgi network membra…	0004871 // signal transducer activity // inferred from electronic annotation /// 0004888 // transmembrane signaling receptor activity // inferred from direct assay /// 0004930 // G-protein coupled receptor activity // inferred from direct assay /// 0005515 // protein binding // inferred from physical interaction /// 0016500 // protein-hormone receptor activity // inferred from electronic annotati…	---	chr12:71833571-71980086 (+) // 99.44 // q21.1
11758879_s_at	2.45612e-07	5.6435e-10	1.5615	0.64293	1.5615	up	3133	HLA-E	major histocompatibility complex, class I, E	0001916 // positive regulation of T cell mediated cytotoxicity // inferred from direct assay /// 0002250 // adaptive immune response // inferred from direct assay /// 0002376 // immune system process // inferred from electronic annotation /// 0002474 // antigen processing and presentation of peptide antigen via MHC class I // not recorded /// 0002474 // antigen processing and presentation of pept…	0000139 // Golgi membrane // traceable author statement /// 0005886 // plasma membrane // traceable author statement /// 0009986 // cell surface // inferred from direct assay /// 0012507 // ER to Golgi transport vesicle membrane // traceable author statement /// 0016020 // membrane // inferred from electronic annotation /// 0016021 // integral component of membrane // inferred from electronic ann…	0005102 // receptor binding // inferred from physical interaction /// 0005515 // protein binding // inferred from electronic annotation /// 0030881 // beta-2-microglobulin binding // inferred from direct assay /// 0030881 // beta-2-microglobulin binding // inferred from mutant phenotype /// 0042288 // MHC class I protein binding // inferred from direct assay /// 0042605 // peptide antigen binding…	Proteasome_Degradation // GenMAPP	chr6:30457182-30461971 (+) // 66.05 // p21.33
11715776_a_at	2.45612e-07	5.66321e-10	1.56744	0.648413	1.56744	up	26353	HSPB8	heat shock protein family B (small) member 8	---	0005622 // intracellular // inferred from direct assay /// 0005634 // nucleus // inferred from direct assay /// 0005654 // nucleoplasm // inferred from direct assay /// 0005737 // cytoplasm // inferred from direct assay /// 0005794 // Golgi apparatus // inferred from direct assay	0004672 // protein kinase activity // inferred from direct assay /// 0005515 // protein binding // inferred from physical interaction /// 0042802 // identical protein binding // inferred from physical interaction	---	chr12:119616446-119632534 (+) // 80.03 // q24.23
11726174_at	2.45612e-07	5.66854e-10	-1.40539	-0.490967	1.40539	down	389432	SAMD5	sterile alpha motif domain containing 5	---	---	0005515 // protein binding // inferred from electronic annotation	---	chr6:147829825-147891154 (+) // 81.5 // q24.3
11726294_s_at	2.58289e-07	6.01341e-10	-1.48905	-0.574392	1.48905	down	1050	CEBPA	CCAAT/enhancer binding protein (C/EBP), alpha	0000050 // urea cycle // inferred from electronic annotation /// 0000122 // negative regulation of transcription from RNA polymerase II promoter // inferred from electronic annotation /// 0001889 // liver development // inferred from sequence or structural similarity /// 0001892 // embryonic placenta development // inferred from electronic annotation /// 0006091 // generation of precursor metabol…	0005634 // nucleus // inferred from direct assay /// 0005634 // nucleus // non-traceable author statement /// 0005667 // transcription factor complex // inferred from electronic annotation /// 0005730 // nucleolus // inferred from direct assay /// 0005730 // nucleolus // inferred from electronic annotation /// 0016363 // nuclear matrix // inferred from electronic annotation /// 0035189 // Rb-E2F …	0000978 // RNA polymerase II core promoter proximal region sequence-specific DNA binding // inferred from electronic annotation /// 0001013 // RNA polymerase I regulatory region DNA binding // inferred from direct assay /// 0001077 // transcriptional activator activity, RNA polymerase II core promoter proximal region sequence-specific binding // inferred from electronic annotation /// 0001228 // …	---	chr19:33790841-33793430 (-) // 90.54 // q13.11
11749921_a_at	2.71288e-07	6.37098e-10	1.36805	0.45212	1.36805	up	6385	SDC4	syndecan 4	0001523 // retinoid metabolic process // traceable author statement /// 0001657 // ureteric bud development // inferred from electronic annotation /// 0001843 // neural tube closure // inferred from electronic annotation /// 0005975 // carbohydrate metabolic process // traceable author statement /// 0006024 // glycosaminoglycan biosynthetic process // traceable author statement /// 0006027 // gly…	0005576 // extracellular region // inferred from electronic annotation /// 0005796 // Golgi lumen // traceable author statement /// 0005886 // plasma membrane // traceable author statement /// 0005887 // integral component of plasma membrane // non-traceable author statement /// 0005925 // focal adhesion // inferred from electronic annotation /// 0009986 // cell surface // not recorded /// 001602…	0001968 // fibronectin binding // inferred from electronic annotation /// 0005080 // protein kinase C binding // inferred from electronic annotation /// 0005515 // protein binding // inferred from physical interaction /// 0070053 // thrombospondin receptor activity // inferred from mutant phenotype	---	chr20:43955115-43977064 (-) // 99.92 // q13.12
11753431_x_at	2.74982e-07	6.52395e-10	1.82656	0.869132	1.82656	up	10397	NDRG1	N-myc downstream regulated 1	0008285 // negative regulation of cell proliferation // inferred from electronic annotation /// 0010038 // response to metal ion // traceable author statement /// 0030330 // DNA damage response, signal transduction by p53 class mediator // inferred from expression pattern /// 0032287 // peripheral nervous system myelin maintenance // inferred from electronic annotation /// 0042127 // regulation o…	0005634 // nucleus // inferred from direct assay /// 0005737 // cytoplasm // inferred from direct assay /// 0005813 // centrosome // inferred from direct assay /// 0005815 // microtubule organizing center // inferred from electronic annotation /// 0005829 // cytosol // inferred from electronic annotation /// 0005856 // cytoskeleton // inferred from electronic annotation /// 0005874 // microtubule…	0005515 // protein binding // inferred from physical interaction /// 0008017 // microtubule binding // inferred from direct assay /// 0017137 // Rab GTPase binding // inferred from direct assay /// 0043015 // gamma-tubulin binding // inferred from direct assay /// 0045296 // cadherin binding // inferred from direct assay	---	chr8:134250780-134309480 (-) // 99.55 // q24.22
11749257_a_at	2.74982e-07	6.56907e-10	1.58635	0.66571	1.58635	up	9709	HERPUD1	homocysteine-inducible, endoplasmic reticulum stress-inducible, ubiquitin-like domain member 1	0006511 // ubiquitin-dependent protein catabolic process // inferred from electronic annotation /// 0006874 // cellular calcium ion homeostasis // inferred from electronic annotation /// 0006986 // response to unfolded protein // inferred from expression pattern /// 0030968 // endoplasmic reticulum unfolded protein response // traceable author statement /// 0030970 // retrograde protein transport…	0005783 // endoplasmic reticulum // inferred from direct assay /// 0005789 // endoplasmic reticulum membrane // inferred from direct assay /// 0005789 // endoplasmic reticulum membrane // traceable author statement /// 0016020 // membrane // inferred from direct assay /// 0016021 // integral component of membrane // inferred from electronic annotation /// 0034704 // calcium channel complex // inf…	0005515 // protein binding // inferred from physical interaction /// 0044325 // ion channel binding // inferred from physical interaction	Circadian_Exercise // GenMAPP	chr16:56966058-56977793 (+) // 92.15 // q13
11759525_at	2.75141e-07	6.62857e-10	1.55068	0.632905	1.55068	up	4616	GADD45B	growth arrest and DNA damage inducible beta	0000185 // activation of MAPKKK activity // inferred from direct assay /// 0000186 // activation of MAPKK activity // inferred from electronic annotation /// 0006469 // negative regulation of protein kinase activity // inferred from electronic annotation /// 0006915 // apoptotic process // inferred from electronic annotation /// 0006950 // response to stress // inferred from electronic annotation…	0005634 // nucleus // inferred from direct assay /// 0005737 // cytoplasm // inferred from direct assay	0005515 // protein binding // inferred from physical interaction	---	chr19:2476123-2478256 (+) // 91.74 // p13.3
11724779_at	2.82946e-07	6.87389e-10	1.5714	0.652053	1.5714	up	283209	PGM2L1	phosphoglucomutase 2-like 1	0005975 // carbohydrate metabolic process // inferred from electronic annotation /// 0005978 // glycogen biosynthetic process // not recorded /// 0006006 // glucose metabolic process // not recorded /// 0016310 // phosphorylation // inferred from direct assay /// 0016310 // phosphorylation // inferred from electronic annotation /// 0019388 // galactose catabolic process // not recorded /// 007170…	0005829 // cytosol // not recorded	0004614 // phosphoglucomutase activity // not recorded /// 0016740 // transferase activity // inferred from electronic annotation /// 0016853 // isomerase activity // inferred from electronic annotation /// 0016868 // intramolecular transferase activity, phosphotransferases // inferred from electronic annotation /// 0046872 // metal ion binding // inferred from electronic annotation /// 0047933 /…	---	chr11:74041358-74109799 (-) // 85.87 // q13.4
11715692_a_at	2.89005e-07	7.07958e-10	-1.47385	-0.55959	1.47385	down	1153	CIRBP	cold inducible RNA binding protein	0009409 // response to cold // traceable author statement /// 0009411 // response to UV // inferred from direct assay /// 0017148 // negative regulation of translation // inferred from sequence or structural similarity /// 0034063 // stress granule assembly // inferred from sequence or structural similarity /// 0045727 // positive regulation of translation // inferred from direct assay /// 004825…	0005634 // nucleus // inferred from direct assay /// 0005634 // nucleus // inferred from sequence or structural similarity /// 0005654 // nucleoplasm // inferred from electronic annotation /// 0005730 // nucleolus // inferred from direct assay /// 0005737 // cytoplasm // inferred from direct assay /// 0005737 // cytoplasm // inferred from sequence or structural similarity /// 0010494 // cytoplasm…	0000166 // nucleotide binding // inferred from electronic annotation /// 0003676 // nucleic acid binding // inferred from electronic annotation /// 0003723 // RNA binding // inferred from electronic annotation /// 0003730 // mRNA 3'-UTR binding // inferred from direct assay /// 0005515 // protein binding // inferred from physical interaction /// 0030371 // translation repressor activity // inferr…	---	chr19:1266768-1273171 (+) // 85.53 // p13.3
11725103_s_at	3.07012e-07	7.58285e-10	1.56688	0.647893	1.56688	up	1956	EGFR	epidermal growth factor receptor	0000165 // MAPK cascade // traceable author statement /// 0000186 // activation of MAPKK activity // traceable author statement /// 0000902 // cell morphogenesis // inferred from electronic annotation /// 0001503 // ossification // non-traceable author statement /// 0001889 // liver development // inferred from electronic annotation /// 0001892 // embryonic placenta development // inferred from e…	0000139 // Golgi membrane // inferred from electronic annotation /// 0005576 // extracellular region // inferred from electronic annotation /// 0005615 // extracellular space // non-traceable author statement /// 0005622 // intracellular // inferred from electronic annotation /// 0005634 // nucleus // inferred from direct assay /// 0005737 // cytoplasm // inferred from direct assay /// 0005768 //…	0000166 // nucleotide binding // inferred from electronic annotation /// 0001948 // glycoprotein binding // inferred from electronic annotation /// 0003682 // chromatin binding // inferred from direct assay /// 0003690 // double-stranded DNA binding // non-traceable author statement /// 0004672 // protein kinase activity // inferred from electronic annotation /// 0004709 // MAP kinase kinase kina…	---	chr7:55086713-55275325 (+) // 94.55 // p11.2
11728883_a_at	3.1179e-07	7.78561e-10	-1.8997	-0.92577	1.8997	down	167681	PRSS35	protease, serine 35	0006508 // proteolysis // inferred from electronic annotation	0005576 // extracellular region // inferred from electronic annotation /// 0005739 // mitochondrion // inferred from electronic annotation	0004252 // serine-type endopeptidase activity // inferred from electronic annotation	---	chr6:84222054-84235423 (+) // 94.56 // q14.2
11718034_a_at	3.1179e-07	7.82709e-10	-1.72438	-0.786075	1.72438	down	336	APOA2	apolipoprotein A-II	0001523 // retinoid metabolic process // traceable author statement /// 0002526 // acute inflammatory response // inferred from electronic annotation /// 0002740 // negative regulation of cytokine secretion involved in immune response // inferred from direct assay /// 0006457 // protein folding // inferred from direct assay /// 0006641 // triglyceride metabolic process // traceable author stateme…	0005576 // extracellular region // non-traceable author statement /// 0005576 // extracellular region // traceable author statement /// 0005615 // extracellular space // inferred from electronic annotation /// 0005769 // early endosome // traceable author statement /// 0005788 // endoplasmic reticulum lumen // traceable author statement /// 0005829 // cytosol // traceable author statement /// 003…	0005319 // lipid transporter activity // inferred from direct assay /// 0005515 // protein binding // inferred from physical interaction /// 0005543 // phospholipid binding // inferred from direct assay /// 0008035 // high-density lipoprotein particle binding // not recorded /// 0008289 // lipid binding // inferred from direct assay /// 0015485 // cholesterol binding // inferred from direct assay…	---	chr1:161192081-161193418 (-) // 83.45 // q23.3
11716207_s_at	3.12469e-07	7.90741e-10	1.37209	0.456375	1.37209	up	2746 /// 2747	GLUD1 /// GLUD2	glutamate dehydrogenase 1 /// glutamate dehydrogenase 2	0006520 // cellular amino acid metabolic process // inferred from electronic annotation /// 0006536 // glutamate metabolic process // inferred from direct assay /// 0006537 // glutamate biosynthetic process // inferred from direct assay /// 0006538 // glutamate catabolic process // inferred from direct assay /// 0006541 // glutamine metabolic process // inferred from sequence or structural simila…	0005737 // cytoplasm // inferred from direct assay /// 0005739 // mitochondrion // inferred from direct assay /// 0005759 // mitochondrial matrix // traceable author statement	0000166 // nucleotide binding // inferred from electronic annotation /// 0004352 // glutamate dehydrogenase (NAD+) activity // inferred from direct assay /// 0004353 // glutamate dehydrogenase [NAD(P)+] activity // inferred from direct assay /// 0005515 // protein binding // inferred from physical interaction /// 0005524 // ATP binding // inferred from electronic annotation /// 0005525 // GTP bin…	ARGININE-SYN4-PWY // HumanCyc /// GLUTAMATE-SYN2-PWY // HumanCyc /// PROLINE-SYN2-PWY // HumanCyc /// PWY-5766 // HumanCyc	chr10:88810238-88854806 (-) // 87.68 // q23.2
11753233_x_at	3.15514e-07	8.04834e-10	1.90398	0.92902	1.90398	up	10397	NDRG1	N-myc downstream regulated 1	0008285 // negative regulation of cell proliferation // inferred from electronic annotation /// 0010038 // response to metal ion // traceable author statement /// 0030330 // DNA damage response, signal transduction by p53 class mediator // inferred from expression pattern /// 0032287 // peripheral nervous system myelin maintenance // inferred from electronic annotation /// 0042127 // regulation o…	0005634 // nucleus // inferred from direct assay /// 0005737 // cytoplasm // inferred from direct assay /// 0005813 // centrosome // inferred from direct assay /// 0005815 // microtubule organizing center // inferred from electronic annotation /// 0005829 // cytosol // inferred from electronic annotation /// 0005856 // cytoskeleton // inferred from electronic annotation /// 0005874 // microtubule…	0005515 // protein binding // inferred from physical interaction /// 0008017 // microtubule binding // inferred from direct assay /// 0017137 // Rab GTPase binding // inferred from direct assay /// 0043015 // gamma-tubulin binding // inferred from direct assay /// 0045296 // cadherin binding // inferred from direct assay	---	chr8:134260954-134309495 (-) // 69.02 // q24.22
11729080_a_at	3.19218e-07	8.20744e-10	-2.22904	-1.15642	2.22904	down	2104	ESRRG	estrogen-related receptor gamma	0006351 // transcription, DNA-templated // inferred from electronic annotation /// 0006355 // regulation of transcription, DNA-templated // inferred from direct assay /// 0006366 // transcription from RNA polymerase II promoter // inferred from electronic annotation /// 0006367 // transcription initiation from RNA polymerase II promoter // traceable author statement /// 0010467 // gene expression…	0005634 // nucleus // inferred from electronic annotation /// 0005654 // nucleoplasm // traceable author statement	0000977 // RNA polymerase II regulatory region sequence-specific DNA binding // inferred from electronic annotation /// 0001228 // transcriptional activator activity, RNA polymerase II transcription regulatory region sequence-specific binding // inferred from electronic annotation /// 0003677 // DNA binding // inferred from electronic annotation /// 0003700 // transcription factor activity, seque…	---	chr1:216676587-217262976 (-) // 94.01 // q41
11752993_a_at	3.23936e-07	8.44148e-10	1.63964	0.713383	1.63964	up	1843	DUSP1	dual specificity phosphatase 1	0000188 // inactivation of MAPK activity // inferred from sequence or structural similarity /// 0001706 // endoderm formation // not recorded /// 0006470 // protein dephosphorylation // not recorded /// 0006979 // response to oxidative stress // traceable author statement /// 0007049 // cell cycle // inferred from electronic annotation /// 0009416 // response to light stimulus // inferred from el…	0005634 // nucleus // inferred from direct assay /// 0005737 // cytoplasm // inferred from direct assay	0004721 // phosphoprotein phosphatase activity // inferred from electronic annotation /// 0004725 // protein tyrosine phosphatase activity // inferred from electronic annotation /// 0004726 // non-membrane spanning protein tyrosine phosphatase activity // traceable author statement /// 0005515 // protein binding // inferred from physical interaction /// 0008138 // protein tyrosine/serine/threonin…	---	chr5:172195762-172198231 (-) // 99.63 // q35.1
11732060_a_at	3.23936e-07	8.4599e-10	2.80201	1.48646	2.80201	up	93273	LEMD1	LEM domain containing 1	---	0016020 // membrane // inferred from electronic annotation /// 0016021 // integral component of membrane // inferred from electronic annotation	---	---	chr1:205350505-205391181 (-) // 96.09 // q32.1
11726536_at	3.28387e-07	8.72153e-10	-1.65412	-0.726065	1.65412	down	1543	CYP1A1	cytochrome P450, family 1, subfamily A, polypeptide 1	0001666 // response to hypoxia // inferred from electronic annotation /// 0001889 // liver development // inferred from electronic annotation /// 0006778 // porphyrin-containing compound metabolic process // inferred from electronic annotation /// 0006805 // xenobiotic metabolic process // traceable author statement /// 0007568 // aging // inferred from electronic annotation /// 0008283 // cell p…	0005737 // cytoplasm // inferred from electronic annotation /// 0005739 // mitochondrion // inferred from electronic annotation /// 0005783 // endoplasmic reticulum // inferred from electronic annotation /// 0005789 // endoplasmic reticulum membrane // traceable author statement /// 0016020 // membrane // inferred from electronic annotation /// 0031090 // organelle membrane // inferred from elect…	0003824 // catalytic activity // inferred from electronic annotation /// 0004497 // monooxygenase activity // not recorded /// 0005506 // iron ion binding // inferred from electronic annotation /// 0005515 // protein binding // inferred from physical interaction /// 0008395 // steroid hydroxylase activity // inferred from electronic annotation /// 0016491 // oxidoreductase activity // inferred fr…	---	chr15:75011882-75017877 (-) // 99.28 // q24.1
11727620_a_at	3.28387e-07	8.77439e-10	1.91516	0.937465	1.91516	up	200879	LIPH	lipase, member H	0006629 // lipid metabolic process // inferred from electronic annotation /// 0008152 // metabolic process // inferred from electronic annotation /// 0016042 // lipid catabolic process // inferred from direct assay	0005576 // extracellular region // inferred from electronic annotation /// 0005615 // extracellular space // inferred from direct assay /// 0005886 // plasma membrane // inferred from direct assay /// 0016020 // membrane // inferred from electronic annotation	0004620 // phospholipase activity // inferred from direct assay /// 0008201 // heparin binding // inferred from direct assay /// 0016787 // hydrolase activity // inferred from electronic annotation /// 0052689 // carboxylic ester hydrolase activity // inferred from electronic annotation	LIPAS-PWY // HumanCyc /// Statin_Pathway_PharmGKB // GenMAPP	chr3:185225566-185270401 (-) // 99.96 // q27.2
11715514_a_at	3.28387e-07	8.7756e-10	1.61839	0.694555	1.61839	up	9709	HERPUD1	homocysteine-inducible, endoplasmic reticulum stress-inducible, ubiquitin-like domain member 1	0006511 // ubiquitin-dependent protein catabolic process // inferred from electronic annotation /// 0006874 // cellular calcium ion homeostasis // inferred from electronic annotation /// 0006986 // response to unfolded protein // inferred from expression pattern /// 0030968 // endoplasmic reticulum unfolded protein response // traceable author statement /// 0030970 // retrograde protein transport…	0005783 // endoplasmic reticulum // inferred from direct assay /// 0005789 // endoplasmic reticulum membrane // inferred from direct assay /// 0005789 // endoplasmic reticulum membrane // traceable author statement /// 0016020 // membrane // inferred from direct assay /// 0016021 // integral component of membrane // inferred from electronic annotation /// 0034704 // calcium channel complex // inf…	0005515 // protein binding // inferred from physical interaction /// 0044325 // ion channel binding // inferred from physical interaction	Circadian_Exercise // GenMAPP	chr16:56965671-56977793 (+) // 98.21 // q13
11726711_x_at	3.28764e-07	8.89792e-10	-1.49672	-0.581805	1.49672	down	5198	PFAS	phosphoribosylformylglycinamidine synthase	0006144 // purine nucleobase metabolic process // traceable author statement /// 0006164 // purine nucleotide biosynthetic process // not recorded /// 0006189 // 'de novo' IMP biosynthetic process // inferred from electronic annotation /// 0006189 // 'de novo' IMP biosynthetic process // non-traceable author statement /// 0006541 // glutamine metabolic process // not recorded /// 0009156 // ribon…	0005737 // cytoplasm // not recorded /// 0005829 // cytosol // traceable author statement /// 0070062 // extracellular exosome // inferred from direct assay	0000166 // nucleotide binding // inferred from electronic annotation /// 0003824 // catalytic activity // inferred from electronic annotation /// 0004642 // phosphoribosylformylglycinamidine synthase activity // inferred from direct assay /// 0005524 // ATP binding // not recorded /// 0016740 // transferase activity // inferred from electronic annotation /// 0016874 // ligase activity // inferred…	---	chr17:8152572-8173804 (+) // 90.61 // p13.1
11727706_a_at	3.28764e-07	8.9188e-10	1.60621	0.683663	1.60621	up	27113	BBC3	BCL2 binding component 3	0001836 // release of cytochrome c from mitochondria // inferred from direct assay /// 0006915 // apoptotic process // inferred from mutant phenotype /// 0006915 // apoptotic process // traceable author statement /// 0006919 // activation of cysteine-type endopeptidase activity involved in apoptotic process // inferred from direct assay /// 0006974 // cellular response to DNA damage stimulus // i…	0005739 // mitochondrion // inferred from direct assay /// 0005739 // mitochondrion // traceable author statement /// 0005741 // mitochondrial outer membrane // traceable author statement /// 0005764 // lysosome // inferred from direct assay /// 0005783 // endoplasmic reticulum // inferred from direct assay /// 0005829 // cytosol // traceable author statement	0001948 // glycoprotein binding // inferred from physical interaction /// 0005515 // protein binding // inferred from physical interaction /// 0051117 // ATPase binding // inferred from physical interaction	---	chr19:47724078-47734451 (-) // 86.34 // q13.32
11721255_at	3.34682e-07	9.1471e-10	-1.33363	-0.415355	1.33363	down	595	CCND1	cyclin D1	0000082 // G1/S transition of mitotic cell cycle // inferred from direct assay /// 0000082 // G1/S transition of mitotic cell cycle // traceable author statement /// 0000122 // negative regulation of transcription from RNA polymerase II promoter // inferred from direct assay /// 0000278 // mitotic cell cycle // traceable author statement /// 0000320 // re-entry into mitotic cell cycle // inferred…	0000307 // cyclin-dependent protein kinase holoenzyme complex // inferred from direct assay /// 0005622 // intracellular // inferred from direct assay /// 0005634 // nucleus // inferred from direct assay /// 0005654 // nucleoplasm // inferred from direct assay /// 0005654 // nucleoplasm // traceable author statement /// 0005737 // cytoplasm // inferred from electronic annotation /// 0005829 // cy…	0003714 // transcription corepressor activity // inferred from direct assay /// 0004672 // protein kinase activity // inferred from electronic annotation /// 0005515 // protein binding // inferred from physical interaction /// 0008134 // transcription factor binding // inferred from physical interaction /// 0016301 // kinase activity // inferred from electronic annotation /// 0016538 // cyclin-de…	G1_to_S_cell_cycle_Reactome // GenMAPP /// Wnt_signaling // GenMAPP	chr11:69455864-69469242 (+) // 95.44 // q13.3
11753152_x_at	3.66575e-07	1.01061e-09	1.47912	0.564738	1.47912	up	8837	CFLAR	CASP8 and FADD like apoptosis regulator	0006508 // proteolysis // inferred from electronic annotation /// 0006915 // apoptotic process // inferred from mutant phenotype /// 0006915 // apoptotic process // traceable author statement /// 0006919 // activation of cysteine-type endopeptidase activity involved in apoptotic process // not recorded /// 0007519 // skeletal muscle tissue development // inferred from sequence or structural simil…	0005737 // cytoplasm // inferred from direct assay /// 0005829 // cytosol // traceable author statement /// 0031264 // death-inducing signaling complex // inferred from direct assay /// 0031265 // CD95 death-inducing signaling complex // inferred from electronic annotation /// 0045121 // membrane raft // inferred from electronic annotation /// 0097342 // ripoptosome // inferred from direct assay	0002020 // protease binding // inferred from physical interaction /// 0004197 // cysteine-type endopeptidase activity // inferred from electronic annotation /// 0005123 // death receptor binding // inferred from electronic annotation /// 0005515 // protein binding // inferred from physical interaction /// 0008047 // enzyme activator activity // inferred from direct assay /// 0008234 // cysteine-t…	---	chr2:201980886-202005162 (+) // 82.81 // q33.1
11728219_a_at	3.66575e-07	1.01672e-09	-1.56481	-0.645985	1.56481	down	9774	BCLAF1	BCL2-associated transcription factor 1	0006351 // transcription, DNA-templated // inferred from electronic annotation /// 0006355 // regulation of transcription, DNA-templated // inferred from electronic annotation /// 0006915 // apoptotic process // traceable author statement /// 0043065 // positive regulation of apoptotic process // inferred from direct assay /// 0043620 // regulation of DNA-templated transcription in response to st…	0005634 // nucleus // inferred from direct assay /// 0005654 // nucleoplasm // inferred from direct assay /// 0005730 // nucleolus // inferred from direct assay /// 0005737 // cytoplasm // inferred from electronic annotation /// 0016607 // nuclear speck // inferred from direct assay	0003677 // DNA binding // inferred from direct assay /// 0005515 // protein binding // inferred from physical interaction /// 0044822 // poly(A) RNA binding // inferred from direct assay	---	chr6:136578002-136610989 (-) // 98.9 // q23.3
11721883_at	3.67973e-07	1.02805e-09	-1.61443	-0.691025	1.61443	down	10426	TUBGCP3	tubulin, gamma complex associated protein 3	0000086 // G2/M transition of mitotic cell cycle // traceable author statement /// 0000226 // microtubule cytoskeleton organization // inferred from electronic annotation /// 0000278 // mitotic cell cycle // traceable author statement /// 0007020 // microtubule nucleation // non-traceable author statement /// 0007126 // meiotic nuclear division // not recorded /// 0007338 // single fertilization …	0000922 // spindle pole // inferred from electronic annotation /// 0000923 // equatorial microtubule organizing center // not recorded /// 0005737 // cytoplasm // inferred from direct assay /// 0005813 // centrosome // inferred from direct assay /// 0005813 // centrosome // non-traceable author statement /// 0005814 // centriole // inferred from direct assay /// 0005815 // microtubule organizing …	0005198 // structural molecule activity // non-traceable author statement /// 0005200 // structural constituent of cytoskeleton // not recorded /// 0005200 // structural constituent of cytoskeleton // non-traceable author statement /// 0005515 // protein binding // inferred from physical interaction /// 0043015 // gamma-tubulin binding // inferred from direct assay /// 0051011 // microtubule minu…	---	chr13:113139322-113242499 (-) // 99.44 // q34
11734751_x_at	3.86492e-07	1.09195e-09	-1.62459	-0.700078	1.62459	down	4144	MAT2A	methionine adenosyltransferase II, alpha	0006556 // S-adenosylmethionine biosynthetic process // inferred from direct assay /// 0006556 // S-adenosylmethionine biosynthetic process // inferred from electronic annotation /// 0006730 // one-carbon metabolic process // inferred from electronic annotation /// 0006805 // xenobiotic metabolic process // traceable author statement /// 0032259 // methylation // traceable author statement /// 00…	0005829 // cytosol // not recorded /// 0005829 // cytosol // traceable author statement /// 0048269 // methionine adenosyltransferase complex // inferred from direct assay	0000166 // nucleotide binding // inferred from electronic annotation /// 0004478 // methionine adenosyltransferase activity // inferred from direct assay /// 0005515 // protein binding // inferred from physical interaction /// 0005524 // ATP binding // inferred from electronic annotation /// 0016740 // transferase activity // inferred from electronic annotation /// 0046872 // metal ion binding //…	METHIONINE-DEG1-PWY // HumanCyc /// PWY-5041 // HumanCyc /// SAM-PWY // HumanCyc	chr2:85766290-85772401 (+) // 98.88 // p11.2
11749478_a_at	3.86492e-07	1.09543e-09	-1.53932	-0.622295	1.53932	down	4172	MCM3	minichromosome maintenance complex component 3	0000082 // G1/S transition of mitotic cell cycle // traceable author statement /// 0000278 // mitotic cell cycle // traceable author statement /// 0006260 // DNA replication // traceable author statement /// 0006270 // DNA replication initiation // inferred from electronic annotation /// 0006271 // DNA strand elongation involved in DNA replication // traceable author statement /// 0007049 // cell…	0000784 // nuclear chromosome, telomeric region // inferred from direct assay /// 0005634 // nucleus // inferred from direct assay /// 0005654 // nucleoplasm // inferred from direct assay /// 0005654 // nucleoplasm // traceable author statement /// 0005658 // alpha DNA polymerase:primase complex // traceable author statement /// 0005737 // cytoplasm // inferred from electronic annotation /// 0005…	0000166 // nucleotide binding // inferred from electronic annotation /// 0003677 // DNA binding // inferred from electronic annotation /// 0003678 // DNA helicase activity // inferred from electronic annotation /// 0004386 // helicase activity // inferred from electronic annotation /// 0005515 // protein binding // inferred from physical interaction /// 0005524 // ATP binding // inferred from ele…	Cell_cycle_KEGG // GenMAPP /// DNA_replication_Reactome // GenMAPP /// G1_to_S_cell_cycle_Reactome // GenMAPP	chr6:52129056-52149582 (-) // 85.64 // p12.2
11721354_at	4.01773e-07	1.14775e-09	1.54372	0.626413	1.54372	up	2591	GALNT3	polypeptide N-acetylgalactosaminyltransferase 3	0005975 // carbohydrate metabolic process // non-traceable author statement /// 0006486 // protein glycosylation // inferred from electronic annotation /// 0006493 // protein O-linked glycosylation // traceable author statement /// 0008152 // metabolic process // inferred from electronic annotation /// 0016266 // O-glycan processing // traceable author statement /// 0018242 // protein O-linked gl…	0000139 // Golgi membrane // traceable author statement /// 0005794 // Golgi apparatus // inferred from direct assay /// 0016020 // membrane // traceable author statement /// 0016021 // integral component of membrane // inferred from electronic annotation /// 0032580 // Golgi cisterna membrane // inferred from electronic annotation /// 0048471 // perinuclear region of cytoplasm // inferred from d…	0004653 // polypeptide N-acetylgalactosaminyltransferase activity // inferred from direct assay /// 0005509 // calcium ion binding // inferred from direct assay /// 0005515 // protein binding // inferred from physical interaction /// 0016740 // transferase activity // inferred from electronic annotation /// 0016757 // transferase activity, transferring glycosyl groups // inferred from electronic …	---	chr2:166604064-166651364 (-) // 99.09 // q24.3
11763226_x_at	4.01773e-07	1.15501e-09	2.13007	1.0909	2.13007	up	3576	CXCL8	chemokine (C-X-C motif) ligand 8	0001525 // angiogenesis // traceable author statement /// 0002237 // response to molecule of bacterial origin // inferred from direct assay /// 0006928 // movement of cell or subcellular component // traceable author statement /// 0006935 // chemotaxis // traceable author statement /// 0006954 // inflammatory response // traceable author statement /// 0006955 // immune response // not recorded //…	0005576 // extracellular region // traceable author statement /// 0005615 // extracellular space // inferred from electronic annotation /// 0005622 // intracellular // inferred from direct assay /// 0005622 // intracellular // traceable author statement	0005125 // cytokine activity // inferred from electronic annotation /// 0005153 // interleukin-8 receptor binding // inferred from physical interaction /// 0005515 // protein binding // inferred from physical interaction /// 0008009 // chemokine activity // traceable author statement	---	chr4:74606280-74608177 (+) // 70.26 // q13.3
11744422_s_at	4.02087e-07	1.16405e-09	1.77594	0.82858	1.77594	up	8738	CRADD	CASP2 and RIPK1 domain containing adaptor with death domain	0006915 // apoptotic process // inferred from electronic annotation /// 0006919 // activation of cysteine-type endopeptidase activity involved in apoptotic process // inferred from electronic annotation /// 0006977 // DNA damage response, signal transduction by p53 class mediator resulting in cell cycle arrest // inferred from mutant phenotype /// 0007165 // signal transduction // inferred from e…	0005634 // nucleus // inferred from sequence or structural similarity /// 0005737 // cytoplasm // inferred from sequence or structural similarity	0002020 // protease binding // inferred from physical interaction /// 0005515 // protein binding // inferred from physical interaction /// 0030674 // protein binding, bridging // inferred from physical interaction /// 0070513 // death domain binding // inferred from physical interaction	Apoptosis_KEGG // GenMAPP	chr12:94071187-94244509 (+) // 95.87 // q22
11722001_a_at	4.03331e-07	1.17582e-09	-1.4269	-0.51288	1.4269	down	3192	HNRNPU	heterogeneous nuclear ribonucleoprotein U (scaffold attachment factor A)	0000398 // mRNA splicing, via spliceosome // inferred by curator /// 0000398 // mRNA splicing, via spliceosome // traceable author statement /// 0001649 // osteoblast differentiation // inferred from direct assay /// 0006396 // RNA processing // traceable author statement /// 0006397 // mRNA processing // inferred from electronic annotation /// 0008380 // RNA splicing // traceable author statemen…	0005634 // nucleus // inferred from direct assay /// 0005654 // nucleoplasm // inferred from direct assay /// 0005654 // nucleoplasm // traceable author statement /// 0005681 // spliceosomal complex // inferred from electronic annotation /// 0005697 // telomerase holoenzyme complex // inferred from direct assay /// 0005737 // cytoplasm // inferred from electronic annotation /// 0009986 // cell su…	0000166 // nucleotide binding // inferred from electronic annotation /// 0001047 // core promoter binding // inferred from sequence or structural similarity /// 0003677 // DNA binding // traceable author statement /// 0003723 // RNA binding // traceable author statement /// 0005515 // protein binding // inferred from physical interaction /// 0005524 // ATP binding // inferred from electronic anno…	mRNA_processing_Reactome // GenMAPP	chr1:245012757-245028025 (-) // 97.44 // q44
11717639_x_at	4.07251e-07	1.19549e-09	1.33331	0.415017	1.33331	up	6385	SDC4	syndecan 4	0001523 // retinoid metabolic process // traceable author statement /// 0001657 // ureteric bud development // inferred from electronic annotation /// 0001843 // neural tube closure // inferred from electronic annotation /// 0005975 // carbohydrate metabolic process // traceable author statement /// 0006024 // glycosaminoglycan biosynthetic process // traceable author statement /// 0006027 // gly…	0005576 // extracellular region // inferred from electronic annotation /// 0005796 // Golgi lumen // traceable author statement /// 0005886 // plasma membrane // traceable author statement /// 0005887 // integral component of plasma membrane // non-traceable author statement /// 0005925 // focal adhesion // inferred from electronic annotation /// 0009986 // cell surface // not recorded /// 001602…	0001968 // fibronectin binding // inferred from electronic annotation /// 0005080 // protein kinase C binding // inferred from electronic annotation /// 0005515 // protein binding // inferred from physical interaction /// 0070053 // thrombospondin receptor activity // inferred from mutant phenotype	---	chr20:43953927-43977064 (-) // 89.15 // q13.12
11747441_a_at	4.12245e-07	1.2185e-09	1.54498	0.627592	1.54498	up	2745	GLRX	glutaredoxin	0008152 // metabolic process // inferred from electronic annotation /// 0015949 // nucleobase-containing small molecule interconversion // traceable author statement /// 0044281 // small molecule metabolic process // traceable author statement /// 0045454 // cell redox homeostasis // inferred from electronic annotation /// 0045838 // positive regulation of membrane potential // inferred from dire…	0005634 // nucleus // inferred from electronic annotation /// 0005737 // cytoplasm // inferred from electronic annotation /// 0005739 // mitochondrion // inferred from electronic annotation /// 0005829 // cytosol // traceable author statement /// 0070062 // extracellular exosome // inferred from direct assay	0009055 // electron carrier activity // inferred from electronic annotation /// 0015035 // protein disulfide oxidoreductase activity // inferred from electronic annotation /// 0015038 // glutathione disulfide oxidoreductase activity // traceable author statement /// 0016740 // transferase activity // inferred from electronic annotation /// 0047485 // protein N-terminus binding // inferred from ph…	---	chr5:95150003-95158433 (-) // 100.0 // q15
11723283_a_at	4.1892e-07	1.2483e-09	1.45654	0.54255	1.45654	up	634	CEACAM1	carcinoembryonic antigen-related cell adhesion molecule 1 (biliary glycoprotein)	0001525 // angiogenesis // non-traceable author statement /// 0007156 // homophilic cell adhesion via plasma membrane adhesion molecules // non-traceable author statement /// 0007229 // integrin-mediated signaling pathway // non-traceable author statement /// 0007596 // blood coagulation // traceable author statement /// 0016477 // cell migration // non-traceable author statement /// 0050900 // l…	0005576 // extracellular region // inferred from electronic annotation /// 0005886 // plasma membrane // traceable author statement /// 0005887 // integral component of plasma membrane // non-traceable author statement /// 0016020 // membrane // traceable author statement /// 0016021 // integral component of membrane // inferred from direct assay /// 0070062 // extracellular exosome // inferred f…	0005515 // protein binding // inferred from physical interaction /// 0042803 // protein homodimerization activity // inferred from mutant phenotype	---	chr19:43011457-43032661 (-) // 98.92 // q13.2
11758999_s_at	4.1892e-07	1.25519e-09	1.47049	0.5563	1.47049	up	7328	UBE2H	ubiquitin conjugating enzyme E2H	0006511 // ubiquitin-dependent protein catabolic process // traceable author statement /// 0008152 // metabolic process // inferred from electronic annotation /// 0016567 // protein ubiquitination // inferred from electronic annotation /// 0043161 // proteasome-mediated ubiquitin-dependent protein catabolic process // inferred from electronic annotation /// 0070936 // protein K48-linked ubiquitin…	0005737 // cytoplasm // not recorded	0000166 // nucleotide binding // inferred from electronic annotation /// 0004842 // ubiquitin-protein transferase activity // inferred from direct assay /// 0005515 // protein binding // inferred from physical interaction /// 0005524 // ATP binding // inferred from electronic annotation /// 0016740 // transferase activity // inferred from electronic annotation /// 0016874 // ligase activity // in…	---	chr7:129470571-129592789 (-) // 96.01 // q32.2
11715387_at	4.2544e-07	1.28334e-09	1.38685	0.471807	1.38685	up	1026	CDKN1A	cyclin-dependent kinase inhibitor 1A (p21, Cip1)	0000079 // regulation of cyclin-dependent protein serine/threonine kinase activity // traceable author statement /// 0000082 // G1/S transition of mitotic cell cycle // inferred from direct assay /// 0000082 // G1/S transition of mitotic cell cycle // traceable author statement /// 0000086 // G2/M transition of mitotic cell cycle // inferred from mutant phenotype /// 0000278 // mitotic cell cycle…	0000307 // cyclin-dependent protein kinase holoenzyme complex // inferred from direct assay /// 0005634 // nucleus // inferred from direct assay /// 0005654 // nucleoplasm // traceable author statement /// 0005737 // cytoplasm // inferred from electronic annotation /// 0005829 // cytosol // traceable author statement /// 0043231 // intracellular membrane-bounded organelle // inferred from direct …	0004860 // protein kinase inhibitor activity // inferred from electronic annotation /// 0004861 // cyclin-dependent protein serine/threonine kinase inhibitor activity // traceable author statement /// 0005515 // protein binding // inferred from physical interaction /// 0016301 // kinase activity // inferred from electronic annotation /// 0019912 // cyclin-dependent protein kinase activating kinas…	Cell_cycle_KEGG // GenMAPP /// G1_to_S_cell_cycle_Reactome // GenMAPP	chr6:36646490-36655108 (+) // 72.51 // p21.2
11730288_at	4.26788e-07	1.29605e-09	1.97846	0.984375	1.97846	up	394	ARHGAP5	Rho GTPase activating protein 5	0002053 // positive regulation of mesenchymal cell proliferation // inferred from electronic annotation /// 0007155 // cell adhesion // traceable author statement /// 0007165 // signal transduction // inferred from electronic annotation /// 0007264 // small GTPase mediated signal transduction // traceable author statement /// 0007266 // Rho protein signal transduction // traceable author statemen…	0005737 // cytoplasm // inferred from direct assay /// 0005783 // endoplasmic reticulum // inferred from direct assay /// 0005829 // cytosol // traceable author statement /// 0016020 // membrane // inferred from electronic annotation	0003924 // GTPase activity // traceable author statement /// 0005096 // GTPase activator activity // inferred from electronic annotation /// 0005515 // protein binding // inferred from physical interaction /// 0005525 // GTP binding // inferred from electronic annotation /// 0042169 // SH2 domain binding // inferred from physical interaction	---	chr14:32546494-32628932 (+) // 98.56 // q12
11720475_x_at	4.27995e-07	1.30838e-09	-1.60336	-0.681102	1.60336	down	6421 /// 654780	SFPQ /// SFPQ	splicing factor proline/glutamine-rich /// splicing factor proline/glutamine-rich	0000122 // negative regulation of transcription from RNA polymerase II promoter // inferred from direct assay /// 0000122 // negative regulation of transcription from RNA polymerase II promoter // inferred from genetic interaction /// 0000122 // negative regulation of transcription from RNA polymerase II promoter // inferred from mutant phenotype /// 0000380 // alternative mRNA splicing, via spli…	0000785 // chromatin // inferred from direct assay /// 0005634 // nucleus // inferred from direct assay /// 0005654 // nucleoplasm // inferred from direct assay /// 0005737 // cytoplasm // inferred from electronic annotation /// 0016363 // nuclear matrix // inferred from direct assay /// 0042382 // paraspeckles // inferred from direct assay /// 0090575 // RNA polymerase II transcription factor co…	0000166 // nucleotide binding // inferred from electronic annotation /// 0000976 // transcription regulatory region sequence-specific DNA binding // not recorded /// 0000976 // transcription regulatory region sequence-specific DNA binding // inferred from sequence or structural similarity /// 0000980 // RNA polymerase II distal enhancer sequence-specific DNA binding // inferred from sequence or s…	---	chr1:35647906-35658982 (-) // 83.81 // p34.3
11749456_a_at	4.29039e-07	1.32025e-09	-2.39443	-1.25968	2.39443	down	2104	ESRRG	estrogen-related receptor gamma	0006351 // transcription, DNA-templated // inferred from electronic annotation /// 0006355 // regulation of transcription, DNA-templated // inferred from direct assay /// 0006366 // transcription from RNA polymerase II promoter // inferred from electronic annotation /// 0006367 // transcription initiation from RNA polymerase II promoter // traceable author statement /// 0010467 // gene expression…	0005634 // nucleus // inferred from electronic annotation /// 0005654 // nucleoplasm // traceable author statement	0000977 // RNA polymerase II regulatory region sequence-specific DNA binding // inferred from electronic annotation /// 0001228 // transcriptional activator activity, RNA polymerase II transcription regulatory region sequence-specific binding // inferred from electronic annotation /// 0003677 // DNA binding // inferred from electronic annotation /// 0003700 // transcription factor activity, seque…	---	chr1:216676595-216896795 (-) // 93.11 // q41
11731778_a_at	4.36556e-07	1.35222e-09	-1.59641	-0.674827	1.59641	down	64757	MARC1	mitochondrial amidoxime reducing component 1	0008152 // metabolic process // inferred from electronic annotation /// 0042126 // nitrate metabolic process // inferred from direct assay /// 0051410 // detoxification of nitrogen compound // non-traceable author statement /// 0055114 // oxidation-reduction process // inferred from direct assay	0005739 // mitochondrion // inferred from sequence or structural similarity /// 0005741 // mitochondrial outer membrane // inferred from electronic annotation /// 0005743 // mitochondrial inner membrane // inferred from electronic annotation /// 0016020 // membrane // inferred from electronic annotation /// 0016021 // integral component of membrane // inferred from electronic annotation	0003824 // catalytic activity // inferred from electronic annotation /// 0008940 // nitrate reductase activity // inferred from direct assay /// 0016491 // oxidoreductase activity // inferred from electronic annotation /// 0030151 // molybdenum ion binding // inferred from direct assay /// 0030170 // pyridoxal phosphate binding // inferred from electronic annotation /// 0043546 // molybdopterin c…	---	chr1:220960038-220987741 (+) // 98.59 // q41
11731754_at	4.50236e-07	1.41688e-09	-1.60077	-0.678765	1.60077	down	1045	CDX2	caudal type homeobox 2	0000122 // negative regulation of transcription from RNA polymerase II promoter // inferred from direct assay /// 0001568 // blood vessel development // inferred from electronic annotation /// 0001824 // blastocyst development // inferred from electronic annotation /// 0001829 // trophectodermal cell differentiation // inferred from electronic annotation /// 0001890 // placenta development // inf…	0000794 // condensed nuclear chromosome // inferred from electronic annotation /// 0005634 // nucleus // inferred from electronic annotation /// 0005654 // nucleoplasm // inferred from direct assay /// 0017053 // transcriptional repressor complex // inferred from electronic annotation /// 0043234 // protein complex // inferred from electronic annotation	0000980 // RNA polymerase II distal enhancer sequence-specific DNA binding // inferred from direct assay /// 0001227 // transcriptional repressor activity, RNA polymerase II transcription regulatory region sequence-specific binding // inferred from direct assay /// 0003677 // DNA binding // inferred from electronic annotation /// 0003690 // double-stranded DNA binding // inferred from electronic …	---	chr13:28535825-28543505 (-) // 93.13 // q12.2
11758198_s_at	4.50236e-07	1.42222e-09	1.71377	0.777175	1.71377	up	1649	DDIT3	DNA damage inducible transcript 3	0000122 // negative regulation of transcription from RNA polymerase II promoter // inferred from direct assay /// 0000122 // negative regulation of transcription from RNA polymerase II promoter // inferred from genetic interaction /// 0001955 // blood vessel maturation // inferred from electronic annotation /// 0006351 // transcription, DNA-templated // inferred from electronic annotation /// 000…	0005634 // nucleus // inferred from direct assay /// 0005654 // nucleoplasm // traceable author statement /// 0005737 // cytoplasm // inferred from electronic annotation /// 0005770 // late endosome // inferred from electronic annotation /// 0005829 // cytosol // traceable author statement /// 0032993 // protein-DNA complex // inferred from direct assay /// 0035976 // AP1 complex // inferred from…	0000976 // transcription regulatory region sequence-specific DNA binding // inferred from direct assay /// 0000978 // RNA polymerase II core promoter proximal region sequence-specific DNA binding // inferred from direct assay /// 0001077 // transcriptional activator activity, RNA polymerase II core promoter proximal region sequence-specific binding // inferred from direct assay /// 0003677 // DNA…	---	chr12:57910470-57914294 (-) // 86.36 // q13.3
11718347_a_at	4.50236e-07	1.42233e-09	1.4434	0.52947	1.4434	up	6286	S100P	S100 calcium binding protein P	0010033 // response to organic substance // inferred from expression pattern /// 0043542 // endothelial cell migration // inferred from mutant phenotype	0005634 // nucleus // inferred from direct assay /// 0005737 // cytoplasm // traceable author statement /// 0005886 // plasma membrane // inferred from electronic annotation /// 0016020 // membrane // inferred from electronic annotation /// 0031528 // microvillus membrane // inferred from electronic annotation /// 0042995 // cell projection // inferred from electronic annotation /// 0070062 // ex…	0000287 // magnesium ion binding // traceable author statement /// 0005509 // calcium ion binding // inferred from electronic annotation /// 0005515 // protein binding // inferred from physical interaction /// 0046872 // metal ion binding // inferred from electronic annotation /// 0048306 // calcium-dependent protein binding // inferred from physical interaction /// 0050786 // RAGE receptor bindi…	---	chr4:6695565-6699262 (+) // 94.11 // p16.1
11718048_a_at	4.50236e-07	1.44683e-09	1.60052	0.678542	1.60052	up	2745	GLRX	glutaredoxin	0008152 // metabolic process // inferred from electronic annotation /// 0015949 // nucleobase-containing small molecule interconversion // traceable author statement /// 0044281 // small molecule metabolic process // traceable author statement /// 0045454 // cell redox homeostasis // inferred from electronic annotation /// 0045838 // positive regulation of membrane potential // inferred from dire…	0005634 // nucleus // inferred from electronic annotation /// 0005737 // cytoplasm // inferred from electronic annotation /// 0005739 // mitochondrion // inferred from electronic annotation /// 0005829 // cytosol // traceable author statement /// 0070062 // extracellular exosome // inferred from direct assay	0009055 // electron carrier activity // inferred from electronic annotation /// 0015035 // protein disulfide oxidoreductase activity // inferred from electronic annotation /// 0015038 // glutathione disulfide oxidoreductase activity // traceable author statement /// 0016740 // transferase activity // inferred from electronic annotation /// 0047485 // protein N-terminus binding // inferred from ph…	---	chr5:95149553-95158709 (-) // 97.96 // q15
11754154_a_at	4.50236e-07	1.45065e-09	-1.59372	-0.672398	1.59372	down	1543	CYP1A1	cytochrome P450, family 1, subfamily A, polypeptide 1	0001666 // response to hypoxia // inferred from electronic annotation /// 0001889 // liver development // inferred from electronic annotation /// 0006778 // porphyrin-containing compound metabolic process // inferred from electronic annotation /// 0006805 // xenobiotic metabolic process // traceable author statement /// 0007568 // aging // inferred from electronic annotation /// 0008283 // cell p…	0005737 // cytoplasm // inferred from electronic annotation /// 0005739 // mitochondrion // inferred from electronic annotation /// 0005783 // endoplasmic reticulum // inferred from electronic annotation /// 0005789 // endoplasmic reticulum membrane // traceable author statement /// 0016020 // membrane // inferred from electronic annotation /// 0031090 // organelle membrane // inferred from elect…	0003824 // catalytic activity // inferred from electronic annotation /// 0004497 // monooxygenase activity // not recorded /// 0005506 // iron ion binding // inferred from electronic annotation /// 0005515 // protein binding // inferred from physical interaction /// 0008395 // steroid hydroxylase activity // inferred from electronic annotation /// 0016491 // oxidoreductase activity // inferred fr…	---	chr15:75012685-75017832 (-) // 99.52 // q24.1
11721881_at	4.50236e-07	1.45723e-09	-1.55483	-0.636755	1.55483	down	10426	TUBGCP3	tubulin, gamma complex associated protein 3	0000086 // G2/M transition of mitotic cell cycle // traceable author statement /// 0000226 // microtubule cytoskeleton organization // inferred from electronic annotation /// 0000278 // mitotic cell cycle // traceable author statement /// 0007020 // microtubule nucleation // non-traceable author statement /// 0007126 // meiotic nuclear division // not recorded /// 0007338 // single fertilization …	0000922 // spindle pole // inferred from electronic annotation /// 0000923 // equatorial microtubule organizing center // not recorded /// 0005737 // cytoplasm // inferred from direct assay /// 0005813 // centrosome // inferred from direct assay /// 0005813 // centrosome // non-traceable author statement /// 0005814 // centriole // inferred from direct assay /// 0005815 // microtubule organizing …	0005198 // structural molecule activity // non-traceable author statement /// 0005200 // structural constituent of cytoskeleton // not recorded /// 0005200 // structural constituent of cytoskeleton // non-traceable author statement /// 0005515 // protein binding // inferred from physical interaction /// 0043015 // gamma-tubulin binding // inferred from direct assay /// 0051011 // microtubule minu…	---	chr13:113139322-113242499 (-) // 99.44 // q34
11743692_a_at	4.50236e-07	1.45909e-09	-1.6361	-0.710265	1.6361	down	4173	MCM4	minichromosome maintenance complex component 4	0000082 // G1/S transition of mitotic cell cycle // traceable author statement /// 0000278 // mitotic cell cycle // traceable author statement /// 0006260 // DNA replication // non-traceable author statement /// 0006260 // DNA replication // traceable author statement /// 0006268 // DNA unwinding involved in DNA replication // inferred from electronic annotation /// 0006270 // DNA replication ini…	0000784 // nuclear chromosome, telomeric region // inferred from direct assay /// 0005634 // nucleus // non-traceable author statement /// 0005654 // nucleoplasm // inferred from direct assay /// 0005654 // nucleoplasm // traceable author statement /// 0016020 // membrane // inferred from direct assay /// 0042555 // MCM complex // inferred from direct assay	0000166 // nucleotide binding // inferred from electronic annotation /// 0003677 // DNA binding // inferred from electronic annotation /// 0003678 // DNA helicase activity // inferred from electronic annotation /// 0003697 // single-stranded DNA binding // inferred from electronic annotation /// 0004003 // ATP-dependent DNA helicase activity // inferred from direct assay /// 0004386 // helicase a…	Cell_cycle_KEGG // GenMAPP /// DNA_replication_Reactome // GenMAPP /// G1_to_S_cell_cycle_Reactome // GenMAPP	chr8:48872762-48891078 (+) // 82.81 // q11.21
11727707_a_at	4.50236e-07	1.46752e-09	1.44718	0.533245	1.44718	up	27113	BBC3	BCL2 binding component 3	0001836 // release of cytochrome c from mitochondria // inferred from direct assay /// 0006915 // apoptotic process // inferred from mutant phenotype /// 0006915 // apoptotic process // traceable author statement /// 0006919 // activation of cysteine-type endopeptidase activity involved in apoptotic process // inferred from direct assay /// 0006974 // cellular response to DNA damage stimulus // i…	0005739 // mitochondrion // inferred from direct assay /// 0005739 // mitochondrion // traceable author statement /// 0005741 // mitochondrial outer membrane // traceable author statement /// 0005764 // lysosome // inferred from direct assay /// 0005783 // endoplasmic reticulum // inferred from direct assay /// 0005829 // cytosol // traceable author statement	0001948 // glycoprotein binding // inferred from physical interaction /// 0005515 // protein binding // inferred from physical interaction /// 0051117 // ATPase binding // inferred from physical interaction	---	chr19:47724078-47734451 (-) // 86.34 // q13.32
11717565_s_at	4.67085e-07	1.53189e-09	1.44314	0.529212	1.44314	up	2012	EMP1	epithelial membrane protein 1	0007275 // multicellular organismal development // traceable author statement /// 0008219 // cell death // inferred from direct assay /// 0008283 // cell proliferation // traceable author statement /// 0008544 // epidermis development // traceable author statement /// 0016049 // cell growth // inferred from electronic annotation /// 0032060 // bleb assembly // inferred from direct assay	0005886 // plasma membrane // inferred from direct assay /// 0016020 // membrane // traceable author statement /// 0016021 // integral component of membrane // inferred from electronic annotation	0005515 // protein binding // inferred from physical interaction	---	chr12:13349448-13371604 (+) // 93.18 // p13.1
11722586_a_at	4.73096e-07	1.56524e-09	-1.38175	-0.466493	1.38175	down	10146	G3BP1	GTPase activating protein (SH3 domain) binding protein 1	0006810 // transport // inferred from electronic annotation /// 0007265 // Ras protein signal transduction // traceable author statement /// 0008152 // metabolic process // inferred from electronic annotation /// 0008152 // metabolic process // traceable author statement /// 0032508 // DNA duplex unwinding // traceable author statement /// 0090090 // negative regulation of canonical Wnt signaling…	0005622 // intracellular // inferred from electronic annotation /// 0005634 // nucleus // inferred from electronic annotation /// 0005737 // cytoplasm // inferred from direct assay /// 0005829 // cytosol // inferred from electronic annotation /// 0005886 // plasma membrane // inferred from electronic annotation /// 0005925 // focal adhesion // inferred from direct assay /// 0010494 // cytoplasmic…	0000166 // nucleotide binding // inferred from electronic annotation /// 0003676 // nucleic acid binding // inferred from electronic annotation /// 0003677 // DNA binding // inferred from electronic annotation /// 0003723 // RNA binding // inferred from electronic annotation /// 0003729 // mRNA binding // inferred from electronic annotation /// 0004003 // ATP-dependent DNA helicase activity // tr…	---	chr5:151151470-151184915 (+) // 98.25 // q33.1
11720105_a_at	4.73096e-07	1.57076e-09	-1.84694	-0.885137	1.84694	down	1836	SLC26A2	solute carrier family 26 (anion exchanger), member 2	0001503 // ossification // inferred from electronic annotation /// 0005975 // carbohydrate metabolic process // traceable author statement /// 0006805 // xenobiotic metabolic process // traceable author statement /// 0006810 // transport // inferred from electronic annotation /// 0006811 // ion transport // traceable author statement /// 0008272 // sulfate transport // traceable author statement …	0005886 // plasma membrane // traceable author statement /// 0005887 // integral component of plasma membrane // traceable author statement /// 0016020 // membrane // traceable author statement /// 0016021 // integral component of membrane // inferred from electronic annotation /// 0070062 // extracellular exosome // inferred from direct assay	0005254 // chloride channel activity // not recorded /// 0008271 // secondary active sulfate transmembrane transporter activity // inferred from electronic annotation /// 0015106 // bicarbonate transmembrane transporter activity // not recorded /// 0015116 // sulfate transmembrane transporter activity // traceable author statement /// 0015301 // anion:anion antiporter activity // not recorded ///…	---	chr5:149340291-149366965 (+) // 90.33 // q32
11748597_s_at	5.09474e-07	1.70525e-09	-1.56531	-0.646452	1.56531	down	9774	BCLAF1	BCL2-associated transcription factor 1	0006351 // transcription, DNA-templated // inferred from electronic annotation /// 0006355 // regulation of transcription, DNA-templated // inferred from electronic annotation /// 0006915 // apoptotic process // traceable author statement /// 0043065 // positive regulation of apoptotic process // inferred from direct assay /// 0043620 // regulation of DNA-templated transcription in response to st…	0005634 // nucleus // inferred from direct assay /// 0005654 // nucleoplasm // inferred from direct assay /// 0005730 // nucleolus // inferred from direct assay /// 0005737 // cytoplasm // inferred from electronic annotation /// 0016607 // nuclear speck // inferred from direct assay	0003677 // DNA binding // inferred from direct assay /// 0005515 // protein binding // inferred from physical interaction /// 0044822 // poly(A) RNA binding // inferred from direct assay	---	chr6:136581883-136594282 (-) // 97.91 // q23.3
11753427_a_at	5.09474e-07	1.71336e-09	1.65047	0.722878	1.65047	up	390	RND3	Rho family GTPase 3	0007155 // cell adhesion // traceable author statement /// 0007165 // signal transduction // inferred from electronic annotation /// 0007264 // small GTPase mediated signal transduction // inferred from electronic annotation /// 0008152 // metabolic process // traceable author statement /// 0015031 // protein transport // inferred from electronic annotation /// 0030036 // actin cytoskeleton organ…	0000139 // Golgi membrane // inferred from electronic annotation /// 0005622 // intracellular // inferred from electronic annotation /// 0005794 // Golgi apparatus // inferred from electronic annotation /// 0005925 // focal adhesion // inferred from direct assay /// 0016020 // membrane // inferred from electronic annotation /// 0070062 // extracellular exosome // inferred from direct assay	0000166 // nucleotide binding // inferred from electronic annotation /// 0003924 // GTPase activity // traceable author statement /// 0005515 // protein binding // inferred from physical interaction /// 0005525 // GTP binding // inferred from electronic annotation	---	chr2:151326303-151343614 (-) // 99.78 // q23.3
11722401_at	5.09474e-07	1.72249e-09	-1.29709	-0.37528	1.29709	down	9506	PAGE4	PAGE family member 4	---	---	---	---	chrX:49593905-49599036 (+) // 28.6 // p11.23
11717566_at	5.124e-07	1.74275e-09	1.63774	0.711708	1.63774	up	2012	EMP1	epithelial membrane protein 1	0007275 // multicellular organismal development // traceable author statement /// 0008219 // cell death // inferred from direct assay /// 0008283 // cell proliferation // traceable author statement /// 0008544 // epidermis development // traceable author statement /// 0016049 // cell growth // inferred from electronic annotation /// 0032060 // bleb assembly // inferred from direct assay	0005886 // plasma membrane // inferred from direct assay /// 0016020 // membrane // traceable author statement /// 0016021 // integral component of membrane // inferred from electronic annotation	0005515 // protein binding // inferred from physical interaction	---	chr12:13349448-13371604 (+) // 93.18 // p13.1
11733023_s_at	5.27344e-07	1.81153e-09	1.41888	0.504758	1.41888	up	694	BTG1	B-cell translocation gene 1, anti-proliferative	0006355 // regulation of transcription, DNA-templated // non-traceable author statement /// 0006479 // protein methylation // inferred from electronic annotation /// 0006979 // response to oxidative stress // inferred from electronic annotation /// 0007283 // spermatogenesis // inferred from electronic annotation /// 0008285 // negative regulation of cell proliferation // inferred from direct ass…	0005634 // nucleus // inferred from direct assay /// 0005634 // nucleus // inferred from mutant phenotype /// 0005737 // cytoplasm // inferred from direct assay /// 0005737 // cytoplasm // inferred from mutant phenotype	0003712 // transcription cofactor activity // non-traceable author statement /// 0005515 // protein binding // inferred from physical interaction /// 0019899 // enzyme binding // inferred from physical interaction /// 0019900 // kinase binding // non-traceable author statement	Circadian_Exercise // GenMAPP /// Circadian_Exercise // GenMAPP	chr12:92534055-92539673 (-) // 97.05 // q21.33
11736680_a_at	5.27344e-07	1.81493e-09	-1.89835	-0.924743	1.89835	down	113235	SLC46A1	solute carrier family 46 (folate transporter), member 1	0006766 // vitamin metabolic process // traceable author statement /// 0006767 // water-soluble vitamin metabolic process // traceable author statement /// 0006810 // transport // inferred from electronic annotation /// 0006879 // cellular iron ion homeostasis // traceable author statement /// 0015884 // folic acid transport // inferred from direct assay /// 0015884 // folic acid transport // inf…	0005737 // cytoplasm // inferred from sequence or structural similarity /// 0005886 // plasma membrane // inferred from direct assay /// 0005886 // plasma membrane // traceable author statement /// 0009986 // cell surface // inferred from direct assay /// 0016020 // membrane // inferred from electronic annotation /// 0016021 // integral component of membrane // inferred from electronic annotation…	0005215 // transporter activity // inferred from electronic annotation /// 0005542 // folic acid binding // inferred from electronic annotation /// 0008517 // folic acid transporter activity // inferred from direct assay /// 0008517 // folic acid transporter activity // inferred from mutant phenotype /// 0015078 // hydrogen ion transmembrane transporter activity // inferred from direct assay /// …	---	chr17:26721663-26733228 (-) // 78.17 // q11.2
11715693_s_at	5.66686e-07	1.9618e-09	-1.48141	-0.566967	1.48141	down	1153	CIRBP	cold inducible RNA binding protein	0009409 // response to cold // traceable author statement /// 0009411 // response to UV // inferred from direct assay /// 0017148 // negative regulation of translation // inferred from sequence or structural similarity /// 0034063 // stress granule assembly // inferred from sequence or structural similarity /// 0045727 // positive regulation of translation // inferred from direct assay /// 004825…	0005634 // nucleus // inferred from direct assay /// 0005634 // nucleus // inferred from sequence or structural similarity /// 0005654 // nucleoplasm // inferred from electronic annotation /// 0005730 // nucleolus // inferred from direct assay /// 0005737 // cytoplasm // inferred from direct assay /// 0005737 // cytoplasm // inferred from sequence or structural similarity /// 0010494 // cytoplasm…	0000166 // nucleotide binding // inferred from electronic annotation /// 0003676 // nucleic acid binding // inferred from electronic annotation /// 0003723 // RNA binding // inferred from electronic annotation /// 0003730 // mRNA 3'-UTR binding // inferred from direct assay /// 0005515 // protein binding // inferred from physical interaction /// 0030371 // translation repressor activity // inferr…	---	chr19:1266768-1273171 (+) // 85.53 // p13.3
11753649_s_at	5.74651e-07	2.0078e-09	-1.28993	-0.36729	1.28993	down	6428	SRSF3	serine/arginine-rich splicing factor 3	0000398 // mRNA splicing, via spliceosome // traceable author statement /// 0006366 // transcription from RNA polymerase II promoter // traceable author statement /// 0006369 // termination of RNA polymerase II transcription // traceable author statement /// 0006397 // mRNA processing // inferred from electronic annotation /// 0006406 // mRNA export from nucleus // traceable author statement /// …	0005634 // nucleus // inferred from electronic annotation /// 0005654 // nucleoplasm // traceable author statement /// 0005737 // cytoplasm // inferred from electronic annotation	0000166 // nucleotide binding // inferred from electronic annotation /// 0003676 // nucleic acid binding // inferred from electronic annotation /// 0003723 // RNA binding // traceable author statement /// 0005515 // protein binding // inferred from physical interaction /// 0044822 // poly(A) RNA binding // inferred from direct assay	---	chr11:18686596-18687130 (+) // 95.45 // p15.1 /// chr6:36564539-36569798 (+) // 99.05 // p21.31
11751342_a_at	5.74651e-07	2.02765e-09	1.9049	0.929717	1.9049	up	10397	NDRG1	N-myc downstream regulated 1	0008285 // negative regulation of cell proliferation // inferred from electronic annotation /// 0010038 // response to metal ion // traceable author statement /// 0030330 // DNA damage response, signal transduction by p53 class mediator // inferred from expression pattern /// 0032287 // peripheral nervous system myelin maintenance // inferred from electronic annotation /// 0042127 // regulation o…	0005634 // nucleus // inferred from direct assay /// 0005737 // cytoplasm // inferred from direct assay /// 0005813 // centrosome // inferred from direct assay /// 0005815 // microtubule organizing center // inferred from electronic annotation /// 0005829 // cytosol // inferred from electronic annotation /// 0005856 // cytoskeleton // inferred from electronic annotation /// 0005874 // microtubule…	0005515 // protein binding // inferred from physical interaction /// 0008017 // microtubule binding // inferred from direct assay /// 0017137 // Rab GTPase binding // inferred from direct assay /// 0043015 // gamma-tubulin binding // inferred from direct assay /// 0045296 // cadherin binding // inferred from direct assay	---	chr8:134250940-134309495 (-) // 99.93 // q24.22
11726369_at	5.74651e-07	2.03291e-09	1.4618	0.547748	1.4618	up	571 /// 100379661	BACH1 /// GRIK1-AS2	BTB and CNC homology 1, basic leucine zipper transcription factor 1 /// GRIK1 antisense RNA 2	0000083 // regulation of transcription involved in G1/S transition of mitotic cell cycle // inferred from mutant phenotype /// 0000117 // regulation of transcription involved in G2/M transition of mitotic cell cycle // inferred from mutant phenotype /// 0000122 // negative regulation of transcription from RNA polymerase II promoter // inferred from mutant phenotype /// 0006281 // DNA repair // in…	0005634 // nucleus // inferred from direct assay /// 0005654 // nucleoplasm // inferred from direct assay /// 0005737 // cytoplasm // inferred from direct assay /// 0005829 // cytosol // inferred from direct assay /// 0031463 // Cul3-RING ubiquitin ligase complex // not recorded	0000980 // RNA polymerase II distal enhancer sequence-specific DNA binding // not recorded /// 0001078 // transcriptional repressor activity, RNA polymerase II core promoter proximal region sequence-specific binding // inferred from direct assay /// 0001078 // transcriptional repressor activity, RNA polymerase II core promoter proximal region sequence-specific binding // inferred from mutant phen…	---	chr21:30671736-30718598 (+) // 96.38 // q21.3
11756490_a_at	5.74651e-07	2.03591e-09	-1.45542	-0.541438	1.45542	down	9774	BCLAF1	BCL2-associated transcription factor 1	0006351 // transcription, DNA-templated // inferred from electronic annotation /// 0006355 // regulation of transcription, DNA-templated // inferred from electronic annotation /// 0006915 // apoptotic process // traceable author statement /// 0043065 // positive regulation of apoptotic process // inferred from direct assay /// 0043620 // regulation of DNA-templated transcription in response to st…	0005634 // nucleus // inferred from direct assay /// 0005654 // nucleoplasm // inferred from direct assay /// 0005730 // nucleolus // inferred from direct assay /// 0005737 // cytoplasm // inferred from electronic annotation /// 0016607 // nuclear speck // inferred from direct assay	0003677 // DNA binding // inferred from direct assay /// 0005515 // protein binding // inferred from physical interaction /// 0044822 // poly(A) RNA binding // inferred from direct assay	---	chr6:136579416-136597563 (-) // 96.11 // q23.3
11729120_x_at	6.11944e-07	2.18043e-09	1.4015	0.486975	1.4015	up	3304	HSPA1B	heat shock protein family A (Hsp70) member 1B	0006402 // mRNA catabolic process // inferred from direct assay /// 0006986 // response to unfolded protein // inferred from direct assay /// 0008285 // negative regulation of cell proliferation // inferred from mutant phenotype /// 0010467 // gene expression // traceable author statement /// 0010628 // positive regulation of gene expression // inferred from mutant phenotype /// 0010941 // regula…	0000151 // ubiquitin ligase complex // inferred from direct assay /// 0005634 // nucleus // inferred from direct assay /// 0005654 // nucleoplasm // traceable author statement /// 0005737 // cytoplasm // inferred from direct assay /// 0005739 // mitochondrion // traceable author statement /// 0005783 // endoplasmic reticulum // traceable author statement /// 0005814 // centriole // inferred from …	0000166 // nucleotide binding // inferred from electronic annotation /// 0001618 // virus receptor activity // inferred from electronic annotation /// 0001664 // G-protein coupled receptor binding // inferred from direct assay /// 0005102 // receptor binding // inferred from physical interaction /// 0005515 // protein binding // inferred from physical interaction /// 0005524 // ATP binding // inf…	---	chr6:31795513-31798031 (+) // 94.62 // p21.33
11746809_a_at	6.15376e-07	2.20511e-09	-1.57794	-0.658045	1.57794	down	27300	ZNF544	zinc finger protein 544	0006351 // transcription, DNA-templated // inferred from electronic annotation /// 0006355 // regulation of transcription, DNA-templated // not recorded	0005622 // intracellular // inferred from electronic annotation /// 0005634 // nucleus // inferred from electronic annotation	0003676 // nucleic acid binding // inferred from electronic annotation /// 0003677 // DNA binding // inferred from electronic annotation /// 0003700 // transcription factor activity, sequence-specific DNA binding // not recorded /// 0005515 // protein binding // inferred from physical interaction /// 0046872 // metal ion binding // inferred from electronic annotation	---	chr19:58740279-58774571 (+) // 95.33 // q13.43
11763174_at	6.17095e-07	2.22377e-09	1.62008	0.696068	1.62008	up	5238	PGM3	phosphoglucomutase 3	0005975 // carbohydrate metabolic process // inferred from electronic annotation /// 0006041 // glucosamine metabolic process // non-traceable author statement /// 0006048 // UDP-N-acetylglucosamine biosynthetic process // inferred from electronic annotation /// 0006048 // UDP-N-acetylglucosamine biosynthetic process // inferred from mutant phenotype /// 0006048 // UDP-N-acetylglucosamine biosynt…	0005829 // cytosol // not recorded /// 0005829 // cytosol // traceable author statement	0000287 // magnesium ion binding // inferred from electronic annotation /// 0004610 // phosphoacetylglucosamine mutase activity // inferred from direct assay /// 0004610 // phosphoacetylglucosamine mutase activity // inferred from mutant phenotype /// 0004614 // phosphoglucomutase activity // inferred from electronic annotation /// 0016853 // isomerase activity // inferred from electronic annotat…	PWY-5514 // HumanCyc /// UDPNACETYLGALSYN-PWY // HumanCyc	chr6:83875908-83903633 (-) // 75.49 // q14.1
11715775_a_at	6.81005e-07	2.46786e-09	1.61176	0.688632	1.61176	up	26353	HSPB8	heat shock protein family B (small) member 8	---	0005622 // intracellular // inferred from direct assay /// 0005634 // nucleus // inferred from direct assay /// 0005654 // nucleoplasm // inferred from direct assay /// 0005737 // cytoplasm // inferred from direct assay /// 0005794 // Golgi apparatus // inferred from direct assay	0004672 // protein kinase activity // inferred from direct assay /// 0005515 // protein binding // inferred from physical interaction /// 0042802 // identical protein binding // inferred from physical interaction	---	chr12:119616446-119632534 (+) // 80.03 // q24.23
11729079_s_at	6.90357e-07	2.51573e-09	-1.99749	-0.99819	1.99749	down	2104	ESRRG	estrogen-related receptor gamma	0006351 // transcription, DNA-templated // inferred from electronic annotation /// 0006355 // regulation of transcription, DNA-templated // inferred from direct assay /// 0006366 // transcription from RNA polymerase II promoter // inferred from electronic annotation /// 0006367 // transcription initiation from RNA polymerase II promoter // traceable author statement /// 0010467 // gene expression…	0005634 // nucleus // inferred from electronic annotation /// 0005654 // nucleoplasm // traceable author statement	0000977 // RNA polymerase II regulatory region sequence-specific DNA binding // inferred from electronic annotation /// 0001228 // transcriptional activator activity, RNA polymerase II transcription regulatory region sequence-specific binding // inferred from electronic annotation /// 0003677 // DNA binding // inferred from electronic annotation /// 0003700 // transcription factor activity, seque…	---	chr1:216676587-217262976 (-) // 94.01 // q41
11756985_a_at	6.98177e-07	2.55836e-09	-1.53277	-0.61614	1.53277	down	4144	MAT2A	methionine adenosyltransferase II, alpha	0006556 // S-adenosylmethionine biosynthetic process // inferred from direct assay /// 0006556 // S-adenosylmethionine biosynthetic process // inferred from electronic annotation /// 0006730 // one-carbon metabolic process // inferred from electronic annotation /// 0006805 // xenobiotic metabolic process // traceable author statement /// 0032259 // methylation // traceable author statement /// 00…	0005829 // cytosol // not recorded /// 0005829 // cytosol // traceable author statement /// 0048269 // methionine adenosyltransferase complex // inferred from direct assay	0000166 // nucleotide binding // inferred from electronic annotation /// 0004478 // methionine adenosyltransferase activity // inferred from direct assay /// 0005515 // protein binding // inferred from physical interaction /// 0005524 // ATP binding // inferred from electronic annotation /// 0016740 // transferase activity // inferred from electronic annotation /// 0046872 // metal ion binding //…	METHIONINE-DEG1-PWY // HumanCyc /// PWY-5041 // HumanCyc /// SAM-PWY // HumanCyc	chr2:85766305-85771148 (+) // 100.0 // p11.2
11742818_a_at	7.03307e-07	2.59871e-09	1.86501	0.89918	1.86501	up	5329	PLAUR	plasminogen activator, urokinase receptor	0001934 // positive regulation of protein phosphorylation // inferred from mutant phenotype /// 0006501 // C-terminal protein lipidation // traceable author statement /// 0006928 // movement of cell or subcellular component // non-traceable author statement /// 0006935 // chemotaxis // traceable author statement /// 0007165 // signal transduction // traceable author statement /// 0007596 // blood…	0005576 // extracellular region // inferred from electronic annotation /// 0005788 // endoplasmic reticulum lumen // traceable author statement /// 0005789 // endoplasmic reticulum membrane // traceable author statement /// 0005886 // plasma membrane // inferred from direct assay /// 0005886 // plasma membrane // traceable author statement /// 0005887 // integral component of plasma membrane // i…	0004872 // receptor activity // non-traceable author statement /// 0005102 // receptor binding // inferred from physical interaction /// 0005515 // protein binding // inferred from physical interaction /// 0019899 // enzyme binding // inferred from physical interaction /// 0019904 // protein domain specific binding // inferred from physical interaction /// 0030377 // urokinase plasminogen activat…	---	chr19:44152730-44174502 (-) // 45.24 // q13.31
11763439_s_at	7.03307e-07	2.61619e-09	-1.36174	-0.445455	1.36174	down	3192	HNRNPU	heterogeneous nuclear ribonucleoprotein U (scaffold attachment factor A)	0000398 // mRNA splicing, via spliceosome // inferred by curator /// 0000398 // mRNA splicing, via spliceosome // traceable author statement /// 0001649 // osteoblast differentiation // inferred from direct assay /// 0006396 // RNA processing // traceable author statement /// 0006397 // mRNA processing // inferred from electronic annotation /// 0008380 // RNA splicing // traceable author statemen…	0005634 // nucleus // inferred from direct assay /// 0005654 // nucleoplasm // inferred from direct assay /// 0005654 // nucleoplasm // traceable author statement /// 0005681 // spliceosomal complex // inferred from electronic annotation /// 0005697 // telomerase holoenzyme complex // inferred from direct assay /// 0005737 // cytoplasm // inferred from electronic annotation /// 0009986 // cell su…	0000166 // nucleotide binding // inferred from electronic annotation /// 0001047 // core promoter binding // inferred from sequence or structural similarity /// 0003677 // DNA binding // traceable author statement /// 0003723 // RNA binding // traceable author statement /// 0005515 // protein binding // inferred from physical interaction /// 0005524 // ATP binding // inferred from electronic anno…	mRNA_processing_Reactome // GenMAPP	chr1:245016690-245027793 (-) // 99.91 // q44
11732437_at	7.03307e-07	2.61987e-09	1.64748	0.720262	1.64748	up	171177	RHOV	ras homolog family member V	0007165 // signal transduction // inferred from electronic annotation /// 0007264 // small GTPase mediated signal transduction // traceable author statement /// 0015031 // protein transport // inferred from electronic annotation /// 0051056 // regulation of small GTPase mediated signal transduction // traceable author statement	0005622 // intracellular // inferred from electronic annotation /// 0005768 // endosome // inferred from electronic annotation /// 0005829 // cytosol // traceable author statement /// 0005886 // plasma membrane // traceable author statement /// 0010008 // endosome membrane // inferred from electronic annotation /// 0016020 // membrane // inferred from electronic annotation	0000166 // nucleotide binding // inferred from electronic annotation /// 0005515 // protein binding // inferred from physical interaction /// 0005525 // GTP binding // inferred from electronic annotation /// 0046872 // metal ion binding // inferred from electronic annotation	---	chr15:41164411-41166487 (-) // 95.68 // q15.1
11749300_x_at	7.53158e-07	2.82081e-09	-1.44828	-0.53434	1.44828	down	79084	WDR77	WD repeat domain 77	0000387 // spliceosomal snRNP assembly // traceable author statement /// 0006325 // chromatin organization // traceable author statement /// 0006357 // regulation of transcription from RNA polymerase II promoter // inferred from electronic annotation /// 0008284 // positive regulation of cell proliferation // inferred from electronic annotation /// 0008285 // negative regulation of cell prolifera…	0005634 // nucleus // inferred from genetic interaction /// 0005654 // nucleoplasm // inferred from direct assay /// 0005654 // nucleoplasm // traceable author statement /// 0005737 // cytoplasm // inferred from direct assay /// 0005737 // cytoplasm // inferred from genetic interaction /// 0005794 // Golgi apparatus // inferred from direct assay /// 0005829 // cytosol // inferred from direct assa…	0005515 // protein binding // inferred from physical interaction /// 0030374 // ligand-dependent nuclear receptor transcription coactivator activity // inferred from genetic interaction	---	chr1:111983446-111991874 (-) // 99.78 // p13.2
11739402_a_at	7.5643e-07	2.84838e-09	-1.88805	-0.9169	1.88805	down	51111	KMT5B	lysine (K)-specific methyltransferase 5B	0006351 // transcription, DNA-templated // inferred from electronic annotation /// 0006355 // regulation of transcription, DNA-templated // inferred from electronic annotation /// 0007517 // muscle organ development // inferred from electronic annotation /// 0016568 // chromatin modification // inferred from electronic annotation /// 0016571 // histone methylation // inferred from electronic anno…	0000780 // condensed nuclear chromosome, centromeric region // inferred from electronic annotation /// 0005634 // nucleus // inferred from electronic annotation /// 0005694 // chromosome // inferred from electronic annotation	0005515 // protein binding // inferred from electronic annotation /// 0008168 // methyltransferase activity // inferred from electronic annotation /// 0016740 // transferase activity // inferred from electronic annotation /// 0018024 // histone-lysine N-methyltransferase activity // inferred from direct assay /// 0042799 // histone methyltransferase activity (H4-K20 specific) // inferred from ele…	---	chr11:67923087-67980800 (-) // 97.94 // q13.2
11716666_a_at	7.67934e-07	2.90725e-09	-1.76758	-0.821775	1.76758	down	3399	ID3	inhibitor of DNA binding 3, dominant negative helix-loop-helix protein	0000122 // negative regulation of transcription from RNA polymerase II promoter // inferred from electronic annotation /// 0001656 // metanephros development // inferred from electronic annotation /// 0006275 // regulation of DNA replication // inferred from electronic annotation /// 0006351 // transcription, DNA-templated // inferred from electronic annotation /// 0006355 // regulation of transc…	0005634 // nucleus // inferred by curator /// 0005654 // nucleoplasm // inferred from direct assay /// 0005737 // cytoplasm // inferred from electronic annotation /// 0015630 // microtubule cytoskeleton // inferred from direct assay	0003700 // transcription factor activity, sequence-specific DNA binding // inferred from electronic annotation /// 0003714 // transcription corepressor activity // traceable author statement /// 0005515 // protein binding // inferred from physical interaction /// 0008134 // transcription factor binding // inferred from electronic annotation /// 0019904 // protein domain specific binding // inferr…	---	chr1:23884424-23886335 (-) // 95.96 // p36.12
11747338_a_at	7.81796e-07	2.97556e-09	-1.5221	-0.606065	1.5221	down	27300	ZNF544	zinc finger protein 544	0006351 // transcription, DNA-templated // inferred from electronic annotation /// 0006355 // regulation of transcription, DNA-templated // not recorded	0005622 // intracellular // inferred from electronic annotation /// 0005634 // nucleus // inferred from electronic annotation	0003676 // nucleic acid binding // inferred from electronic annotation /// 0003677 // DNA binding // inferred from electronic annotation /// 0003700 // transcription factor activity, sequence-specific DNA binding // not recorded /// 0005515 // protein binding // inferred from physical interaction /// 0046872 // metal ion binding // inferred from electronic annotation	---	chr19:58740340-58775006 (+) // 85.21 // q13.43
11749746_s_at	7.89822e-07	3.0221e-09	1.46893	0.554768	1.46893	up	7430	EZR	ezrin	0000122 // negative regulation of transcription from RNA polymerase II promoter // inferred from mutant phenotype /// 0001951 // intestinal D-glucose absorption // inferred from electronic annotation /// 0003376 // sphingosine-1-phosphate signaling pathway // inferred from mutant phenotype /// 0007016 // cytoskeletal anchoring at plasma membrane // non-traceable author statement /// 0007159 // le…	0001726 // ruffle // inferred from direct assay /// 0001772 // immunological synapse // inferred from direct assay /// 0001931 // uropod // inferred from electronic annotation /// 0005615 // extracellular space // inferred from direct assay /// 0005622 // intracellular // inferred from electronic annotation /// 0005730 // nucleolus // inferred from direct assay /// 0005737 // cytoplasm // inferre…	0003779 // actin binding // inferred from direct assay /// 0005515 // protein binding // inferred from physical interaction /// 0008017 // microtubule binding // inferred from mutant phenotype /// 0008092 // cytoskeletal protein binding // inferred from electronic annotation /// 0019904 // protein domain specific binding // inferred from physical interaction /// 0032403 // protein complex binding…	---	chr6:159187777-159240419 (-) // 99.74 // q25.3
11724872_a_at	8.15109e-07	3.13535e-09	-1.69329	-0.759825	1.69329	down	9075	CLDN2	claudin 2	0016338 // calcium-independent cell-cell adhesion via plasma membrane cell-adhesion molecules // inferred from sequence or structural similarity	0005886 // plasma membrane // inferred from electronic annotation /// 0005923 // bicellular tight junction // inferred from sequence or structural similarity /// 0016020 // membrane // inferred from electronic annotation /// 0016021 // integral component of membrane // inferred from electronic annotation /// 0030054 // cell junction // inferred from electronic annotation /// 0070062 // extracellu…	0005198 // structural molecule activity // inferred from electronic annotation /// 0005515 // protein binding // inferred from physical interaction /// 0042802 // identical protein binding // inferred from sequence or structural similarity	---	chrX:106163633-106174091 (+) // 84.73 // q22.3
11727812_s_at	8.17384e-07	3.16633e-09	-1.42044	-0.506342	1.42044	down	6426	SRSF1	serine/arginine-rich splicing factor 1	0000380 // alternative mRNA splicing, via spliceosome // inferred from direct assay /// 0000395 // mRNA 5'-splice site recognition // inferred from direct assay /// 0000398 // mRNA splicing, via spliceosome // inferred by curator /// 0000398 // mRNA splicing, via spliceosome // traceable author statement /// 0001701 // in utero embryonic development // inferred from electronic annotation /// 0006…	0005634 // nucleus // inferred from direct assay /// 0005654 // nucleoplasm // inferred from direct assay /// 0005654 // nucleoplasm // traceable author statement /// 0005681 // spliceosomal complex // inferred from electronic annotation /// 0005737 // cytoplasm // inferred from electronic annotation /// 0016607 // nuclear speck // inferred from direct assay /// 0035145 // exon-exon junction comp…	0000166 // nucleotide binding // inferred from electronic annotation /// 0003676 // nucleic acid binding // inferred from electronic annotation /// 0003723 // RNA binding // inferred from direct assay /// 0003723 // RNA binding // inferred from physical interaction /// 0003729 // mRNA binding // inferred from direct assay /// 0005515 // protein binding // inferred from physical interaction /// 00…	---	chr17:56078281-56084707 (-) // 92.21 // q22
11751457_a_at	8.17384e-07	3.1772e-09	-1.67884	-0.747462	1.67884	down	4144	MAT2A	methionine adenosyltransferase II, alpha	0006556 // S-adenosylmethionine biosynthetic process // inferred from direct assay /// 0006556 // S-adenosylmethionine biosynthetic process // inferred from electronic annotation /// 0006730 // one-carbon metabolic process // inferred from electronic annotation /// 0006805 // xenobiotic metabolic process // traceable author statement /// 0032259 // methylation // traceable author statement /// 00…	0005829 // cytosol // not recorded /// 0005829 // cytosol // traceable author statement /// 0048269 // methionine adenosyltransferase complex // inferred from direct assay	0000166 // nucleotide binding // inferred from electronic annotation /// 0004478 // methionine adenosyltransferase activity // inferred from direct assay /// 0005515 // protein binding // inferred from physical interaction /// 0005524 // ATP binding // inferred from electronic annotation /// 0016740 // transferase activity // inferred from electronic annotation /// 0046872 // metal ion binding //…	METHIONINE-DEG1-PWY // HumanCyc /// PWY-5041 // HumanCyc /// SAM-PWY // HumanCyc	chr2:85766290-85770328 (+) // 100.0 // p11.2
11742989_a_at	8.38585e-07	3.2838e-09	1.45612	0.54213	1.45612	up	7430	EZR	ezrin	0000122 // negative regulation of transcription from RNA polymerase II promoter // inferred from mutant phenotype /// 0001951 // intestinal D-glucose absorption // inferred from electronic annotation /// 0002066 // columnar/cuboidal epithelial cell development // inferred from sequence or structural similarity /// 0002066 // columnar/cuboidal epithelial cell development // inferred from electroni…	0001726 // ruffle // inferred from direct assay /// 0001772 // immunological synapse // inferred from direct assay /// 0001931 // uropod // inferred from electronic annotation /// 0005615 // extracellular space // inferred from direct assay /// 0005622 // intracellular // inferred from electronic annotation /// 0005730 // nucleolus // inferred from direct assay /// 0005737 // cytoplasm // inferre…	0000166 // nucleotide binding // inferred from electronic annotation /// 0003779 // actin binding // inferred from direct assay /// 0004672 // protein kinase activity // inferred from electronic annotation /// 0004713 // protein tyrosine kinase activity // inferred from direct assay /// 0004713 // protein tyrosine kinase activity // inferred from electronic annotation /// 0004714 // transmembrane…	---	chr6:159186779-159239340 (-) // 85.67 // q25.3
11752942_s_at	8.38585e-07	3.29356e-09	1.53995	0.622885	1.53995	up	1628	DBP	D site of albumin promoter (albumin D-box) binding protein	0001568 // blood vessel development // inferred from electronic annotation /// 0001889 // liver development // inferred from electronic annotation /// 0003376 // sphingosine-1-phosphate signaling pathway // inferred from mutant phenotype /// 0006351 // transcription, DNA-templated // inferred from electronic annotation /// 0006355 // regulation of transcription, DNA-templated // inferred from ele…	0005634 // nucleus // inferred from electronic annotation /// 0005737 // cytoplasm // inferred from electronic annotation /// 0005764 // lysosome // inferred from electronic annotation /// 0005765 // lysosomal membrane // inferred from direct assay /// 0005765 // lysosomal membrane // inferred from electronic annotation /// 0005829 // cytosol // inferred from direct assay /// 0005829 // cytosol /…	0000166 // nucleotide binding // inferred from electronic annotation /// 0000977 // RNA polymerase II regulatory region sequence-specific DNA binding // inferred from direct assay /// 0001077 // transcriptional activator activity, RNA polymerase II core promoter proximal region sequence-specific binding // inferred from direct assay /// 0003677 // DNA binding // inferred from electronic annotatio…	S1P_Signaling // GenMAPP	chr19:49133819-49140369 (-) // 88.81 // q13.33
11742997_x_at	8.39014e-07	3.31223e-09	-1.47073	-0.556532	1.47073	down	4172	MCM3	minichromosome maintenance complex component 3	0000082 // G1/S transition of mitotic cell cycle // traceable author statement /// 0000278 // mitotic cell cycle // traceable author statement /// 0006260 // DNA replication // traceable author statement /// 0006270 // DNA replication initiation // inferred from electronic annotation /// 0006271 // DNA strand elongation involved in DNA replication // traceable author statement /// 0007049 // cell…	0000784 // nuclear chromosome, telomeric region // inferred from direct assay /// 0005634 // nucleus // inferred from direct assay /// 0005654 // nucleoplasm // inferred from direct assay /// 0005654 // nucleoplasm // traceable author statement /// 0005658 // alpha DNA polymerase:primase complex // traceable author statement /// 0005737 // cytoplasm // inferred from electronic annotation /// 0005…	0000166 // nucleotide binding // inferred from electronic annotation /// 0003677 // DNA binding // inferred from electronic annotation /// 0003678 // DNA helicase activity // inferred from electronic annotation /// 0004386 // helicase activity // inferred from electronic annotation /// 0005515 // protein binding // inferred from physical interaction /// 0005524 // ATP binding // inferred from ele…	Cell_cycle_KEGG // GenMAPP /// DNA_replication_Reactome // GenMAPP /// G1_to_S_cell_cycle_Reactome // GenMAPP	chr6:52128813-52149635 (-) // 95.39 // p12.2
11721013_a_at	8.39151e-07	3.32976e-09	-1.61176	-0.688638	1.61176	down	9589	WTAP	Wilms tumor 1 associated protein	0000381 // regulation of alternative mRNA splicing, via spliceosome // inferred from mutant phenotype /// 0006397 // mRNA processing // inferred from electronic annotation /// 0007049 // cell cycle // inferred from electronic annotation /// 0008380 // RNA splicing // inferred from electronic annotation /// 0010467 // gene expression // traceable author statement /// 0048024 // regulation of mRNA …	0005634 // nucleus // inferred from direct assay /// 0005654 // nucleoplasm // inferred from direct assay /// 0005654 // nucleoplasm // traceable author statement /// 0016607 // nuclear speck // inferred from direct assay /// 0031965 // nuclear membrane // inferred from direct assay /// 0036396 // MIS complex // inferred from direct assay	0005515 // protein binding // inferred from physical interaction	---	chr6:160148026-160171040 (+) // 99.51 // q25.3
11720804_a_at	8.41397e-07	3.35571e-09	-1.40081	-0.486265	1.40081	down	79447	PAGR1	PAXIP1 associated glutamate-rich protein 1	0009607 // response to biotic stimulus // inferred from electronic annotation	0005634 // nucleus // inferred from direct assay /// 0016021 // integral component of membrane // inferred from electronic annotation /// 0035097 // histone methyltransferase complex // inferred from direct assay	0005515 // protein binding // inferred from physical interaction	---	chr16:29827142-29833943 (+) // 92.06 // p11.2
11716819_a_at	8.47086e-07	3.39555e-09	-1.4567	-0.542703	1.4567	down	8454	CUL1	cullin 1	0000082 // G1/S transition of mitotic cell cycle // traceable author statement /// 0000086 // G2/M transition of mitotic cell cycle // traceable author statement /// 0000278 // mitotic cell cycle // traceable author statement /// 0002223 // stimulatory C-type lectin receptor signaling pathway // traceable author statement /// 0002224 // toll-like receptor signaling pathway // traceable author sta…	0005654 // nucleoplasm // traceable author statement /// 0005829 // cytosol // traceable author statement /// 0019005 // SCF ubiquitin ligase complex // inferred from direct assay /// 0019005 // SCF ubiquitin ligase complex // inferred from sequence or structural similarity /// 0031461 // cullin-RING ubiquitin ligase complex // inferred from direct assay /// 1990452 // Parkin-FBXW7-Cul1 ubiquitin…	0005515 // protein binding // inferred from physical interaction /// 0031625 // ubiquitin protein ligase binding // not recorded /// 0061630 // ubiquitin protein ligase activity // not recorded	---	chr7:148395858-148498202 (+) // 97.21 // q36.1
11746134_s_at	8.47589e-07	3.41472e-09	-1.49765	-0.5827	1.49765	down	10528	NOP56	NOP56 ribonucleoprotein	0000154 // rRNA modification // not recorded /// 0006364 // rRNA processing // traceable author statement /// 0042254 // ribosome biogenesis // inferred from electronic annotation	0005634 // nucleus // inferred from electronic annotation /// 0005654 // nucleoplasm // inferred from electronic annotation /// 0005730 // nucleolus // inferred from direct assay /// 0005732 // small nucleolar ribonucleoprotein complex // inferred from direct assay /// 0005737 // cytoplasm // inferred from electronic annotation /// 0016020 // membrane // inferred from direct assay /// 0030529 // …	0003723 // RNA binding // traceable author statement /// 0005515 // protein binding // inferred from physical interaction /// 0030515 // snoRNA binding // inferred from direct assay /// 0044822 // poly(A) RNA binding // inferred from direct assay /// 1990226 // histone methyltransferase binding // inferred from physical interaction	---	chr20:2636332-2639035 (+) // 94.37 // p13
11715388_s_at	8.84543e-07	3.58151e-09	1.36809	0.452163	1.36809	up	1026	CDKN1A	cyclin-dependent kinase inhibitor 1A (p21, Cip1)	0000079 // regulation of cyclin-dependent protein serine/threonine kinase activity // traceable author statement /// 0000082 // G1/S transition of mitotic cell cycle // inferred from direct assay /// 0000082 // G1/S transition of mitotic cell cycle // traceable author statement /// 0000086 // G2/M transition of mitotic cell cycle // inferred from mutant phenotype /// 0000278 // mitotic cell cycle…	0000307 // cyclin-dependent protein kinase holoenzyme complex // inferred from direct assay /// 0005634 // nucleus // inferred from direct assay /// 0005654 // nucleoplasm // traceable author statement /// 0005737 // cytoplasm // inferred from electronic annotation /// 0005829 // cytosol // traceable author statement /// 0043231 // intracellular membrane-bounded organelle // inferred from direct …	0004860 // protein kinase inhibitor activity // inferred from electronic annotation /// 0004861 // cyclin-dependent protein serine/threonine kinase inhibitor activity // traceable author statement /// 0005515 // protein binding // inferred from physical interaction /// 0016301 // kinase activity // inferred from electronic annotation /// 0019912 // cyclin-dependent protein kinase activating kinas…	Cell_cycle_KEGG // GenMAPP /// G1_to_S_cell_cycle_Reactome // GenMAPP	chr6:36646490-36655108 (+) // 72.51 // p21.2
11727096_s_at	9.06176e-07	3.70562e-09	-1.55706	-0.638825	1.55706	down	55266	TMEM19	transmembrane protein 19	---	0016020 // membrane // inferred from electronic annotation /// 0016021 // integral component of membrane // inferred from electronic annotation	0005515 // protein binding // inferred from physical interaction	---	chr12:72079866-72097836 (+) // 73.34 // q21.1
11726602_at	9.06176e-07	3.70579e-09	-1.34524	-0.427862	1.34524	down	55157	DARS2	aspartyl-tRNA synthetase 2, mitochondrial	0006412 // translation // inferred from electronic annotation /// 0006418 // tRNA aminoacylation for protein translation // traceable author statement /// 0010467 // gene expression // traceable author statement /// 0043039 // tRNA aminoacylation // inferred from direct assay /// 0070145 // mitochondrial asparaginyl-tRNA aminoacylation // inferred by curator	0005634 // nucleus // inferred from direct assay /// 0005654 // nucleoplasm // inferred from direct assay /// 0005737 // cytoplasm // inferred from electronic annotation /// 0005739 // mitochondrion // inferred from direct assay /// 0005739 // mitochondrion // traceable author statement /// 0005759 // mitochondrial matrix // traceable author statement	0000049 // tRNA binding // traceable author statement /// 0000166 // nucleotide binding // inferred from electronic annotation /// 0003676 // nucleic acid binding // inferred from electronic annotation /// 0004812 // aminoacyl-tRNA ligase activity // inferred from electronic annotation /// 0004815 // aspartate-tRNA ligase activity // traceable author statement /// 0005515 // protein binding // in…	---	chr1:173793599-173828000 (+) // 87.41 // q25.1
11755936_a_at	9.22956e-07	3.7931e-09	-1.46466	-0.55057	1.46466	down	55556	ENOSF1	enolase superfamily member 1	0008152 // metabolic process // inferred from electronic annotation /// 0009063 // cellular amino acid catabolic process // inferred from electronic annotation /// 0044275 // cellular carbohydrate catabolic process // inferred from direct assay	0005739 // mitochondrion // inferred from electronic annotation	0000287 // magnesium ion binding // inferred from direct assay /// 0003824 // catalytic activity // inferred from electronic annotation /// 0016829 // lyase activity // inferred from electronic annotation /// 0016853 // isomerase activity // inferred from electronic annotation /// 0046872 // metal ion binding // inferred from electronic annotation /// 0050023 // L-fuconate dehydratase activity //…	---	chr18:673917-712607 (-) // 97.81 // p11.32
11716365_x_at	9.39579e-07	3.88044e-09	1.43584	0.521892	1.43584	up	440	ASNS	asparagine synthetase (glutamine-hydrolyzing)	0001889 // liver development // inferred from electronic annotation /// 0006520 // cellular amino acid metabolic process // inferred from electronic annotation /// 0006529 // asparagine biosynthetic process // inferred by curator /// 0006529 // asparagine biosynthetic process // inferred from direct assay /// 0006541 // glutamine metabolic process // not recorded /// 0008152 // metabolic process …	0005829 // cytosol // not recorded /// 0005829 // cytosol // traceable author statement	0000166 // nucleotide binding // inferred from electronic annotation /// 0004066 // asparagine synthase (glutamine-hydrolyzing) activity // not recorded /// 0004066 // asparagine synthase (glutamine-hydrolyzing) activity // inferred from direct assay /// 0005515 // protein binding // inferred from physical interaction /// 0005524 // ATP binding // inferred from electronic annotation /// 0016874 /…	ASPARAGINE-BIOSYNTHESIS // HumanCyc	chr7:97481439-97501789 (-) // 95.94 // q21.3
11748174_x_at	9.4491e-07	3.92158e-09	-1.41348	-0.499255	1.41348	down	4172	MCM3	minichromosome maintenance complex component 3	0000082 // G1/S transition of mitotic cell cycle // traceable author statement /// 0000278 // mitotic cell cycle // traceable author statement /// 0006260 // DNA replication // traceable author statement /// 0006270 // DNA replication initiation // inferred from electronic annotation /// 0006271 // DNA strand elongation involved in DNA replication // traceable author statement /// 0007049 // cell…	0000784 // nuclear chromosome, telomeric region // inferred from direct assay /// 0005634 // nucleus // inferred from direct assay /// 0005654 // nucleoplasm // inferred from direct assay /// 0005654 // nucleoplasm // traceable author statement /// 0005658 // alpha DNA polymerase:primase complex // traceable author statement /// 0005737 // cytoplasm // inferred from electronic annotation /// 0005…	0000166 // nucleotide binding // inferred from electronic annotation /// 0003677 // DNA binding // inferred from electronic annotation /// 0003678 // DNA helicase activity // inferred from electronic annotation /// 0004386 // helicase activity // inferred from electronic annotation /// 0005515 // protein binding // inferred from physical interaction /// 0005524 // ATP binding // inferred from ele…	Cell_cycle_KEGG // GenMAPP /// DNA_replication_Reactome // GenMAPP /// G1_to_S_cell_cycle_Reactome // GenMAPP	chr6:52129008-52149679 (-) // 92.63 // p12.2
11737691_a_at	9.59623e-07	4.00207e-09	-1.97696	-0.983282	1.97696	down	2104	ESRRG	estrogen-related receptor gamma	0006351 // transcription, DNA-templated // inferred from electronic annotation /// 0006355 // regulation of transcription, DNA-templated // inferred from direct assay /// 0006366 // transcription from RNA polymerase II promoter // inferred from electronic annotation /// 0006367 // transcription initiation from RNA polymerase II promoter // traceable author statement /// 0010467 // gene expression…	0005634 // nucleus // inferred from electronic annotation /// 0005654 // nucleoplasm // traceable author statement	0000977 // RNA polymerase II regulatory region sequence-specific DNA binding // inferred from electronic annotation /// 0001228 // transcriptional activator activity, RNA polymerase II transcription regulatory region sequence-specific binding // inferred from electronic annotation /// 0003677 // DNA binding // inferred from electronic annotation /// 0003700 // transcription factor activity, seque…	---	chr1:216676594-217311097 (-) // 91.77 // q41
11717258_a_at	9.63915e-07	4.03949e-09	1.56644	0.64749	1.56644	up	5292	PIM1	Pim-1 proto-oncogene, serine/threonine kinase	0006468 // protein phosphorylation // inferred from direct assay /// 0006915 // apoptotic process // inferred from electronic annotation /// 0007049 // cell cycle // inferred from electronic annotation /// 0007275 // multicellular organismal development // traceable author statement /// 0007346 // regulation of mitotic cell cycle // not recorded /// 0008283 // cell proliferation // inferred from …	0005634 // nucleus // inferred from electronic annotation /// 0005737 // cytoplasm // inferred from direct assay /// 0005886 // plasma membrane // inferred from electronic annotation /// 0016020 // membrane // inferred from electronic annotation	0000166 // nucleotide binding // inferred from electronic annotation /// 0004672 // protein kinase activity // inferred from electronic annotation /// 0004674 // protein serine/threonine kinase activity // inferred from direct assay /// 0005515 // protein binding // inferred from physical interaction /// 0005524 // ATP binding // inferred from direct assay /// 0008134 // transcription factor bind…	---	chr6:37137920-37143204 (+) // 85.99 // p21.2
11745154_a_at	9.93394e-07	4.18314e-09	-1.44074	-0.526815	1.44074	down	4691	NCL	nucleolin	0001525 // angiogenesis // inferred from direct assay /// 0006897 // endocytosis // inferred from electronic annotation /// 0007283 // spermatogenesis // inferred from electronic annotation /// 0032760 // positive regulation of tumor necrosis factor production // inferred from electronic annotation /// 0043066 // negative regulation of apoptotic process // inferred from electronic annotation /// …	0001650 // fibrillar center // inferred from electronic annotation /// 0001651 // dense fibrillar component // inferred from electronic annotation /// 0005634 // nucleus // inferred from direct assay /// 0005654 // nucleoplasm // inferred from direct assay /// 0005730 // nucleolus // inferred from direct assay /// 0005737 // cytoplasm // inferred from electronic annotation /// 0005938 // cell cor…	0000166 // nucleotide binding // inferred from electronic annotation /// 0003676 // nucleic acid binding // inferred from electronic annotation /// 0003677 // DNA binding // inferred from electronic annotation /// 0003697 // single-stranded DNA binding // inferred from electronic annotation /// 0003723 // RNA binding // inferred from direct assay /// 0005102 // receptor binding // inferred from e…	---	chr2:232319618-232329211 (-) // 90.65 // q37.1
11715991_a_at	1.03491e-06	4.3789e-09	-1.54717	-0.629635	1.54717	down	4171	MCM2	minichromosome maintenance complex component 2	0000082 // G1/S transition of mitotic cell cycle // traceable author statement /// 0000278 // mitotic cell cycle // traceable author statement /// 0006260 // DNA replication // traceable author statement /// 0006268 // DNA unwinding involved in DNA replication // inferred from electronic annotation /// 0006270 // DNA replication initiation // inferred from mutant phenotype /// 0006271 // DNA stra…	0000784 // nuclear chromosome, telomeric region // inferred from direct assay /// 0000785 // chromatin // inferred from direct assay /// 0005634 // nucleus // inferred from direct assay /// 0005654 // nucleoplasm // inferred from direct assay /// 0005654 // nucleoplasm // traceable author statement /// 0005664 // nuclear origin of replication recognition complex // inferred from electronic annota…	0000166 // nucleotide binding // inferred from electronic annotation /// 0003677 // DNA binding // traceable author statement /// 0003678 // DNA helicase activity // inferred from electronic annotation /// 0003688 // DNA replication origin binding // inferred from electronic annotation /// 0004386 // helicase activity // inferred from electronic annotation /// 0005515 // protein binding // inferr…	Cell_cycle_KEGG // GenMAPP /// DNA_replication_Reactome // GenMAPP /// G1_to_S_cell_cycle_Reactome // GenMAPP	chr3:127317065-127341279 (+) // 97.85 // q21.3
11719476_at	1.03872e-06	4.43225e-09	-1.49279	-0.578008	1.49279	down	116151	FAM210B	family with sequence similarity 210 member B	---	0016020 // membrane // inferred from electronic annotation /// 0016021 // integral component of membrane // inferred from electronic annotation	---	---	chr20:54934013-54943719 (+) // 77.91 // q13.2
11716398_a_at	1.03872e-06	4.43917e-09	-1.50725	-0.591915	1.50725	down	65008	MRPL1	mitochondrial ribosomal protein L1	0006412 // translation // inferred from electronic annotation /// 0006996 // organelle organization // traceable author statement /// 0032543 // mitochondrial translation // traceable author statement /// 0070124 // mitochondrial translational initiation // traceable author statement /// 0070125 // mitochondrial translational elongation // traceable author statement /// 0070126 // mitochondrial t…	0005654 // nucleoplasm // inferred from direct assay /// 0005739 // mitochondrion // inferred from electronic annotation /// 0005739 // mitochondrion // inferred from direct assay /// 0005743 // mitochondrial inner membrane // traceable author statement /// 0005840 // ribosome // inferred from electronic annotation /// 0015934 // large ribosomal subunit // inferred from electronic annotation /// …	0003723 // RNA binding // inferred from electronic annotation /// 0003735 // structural constituent of ribosome // inferred from electronic annotation /// 0005515 // protein binding // inferred from physical interaction /// 0044822 // poly(A) RNA binding // inferred from direct assay	---	chr4:78783673-78873939 (+) // 95.25 // q21.1
11724725_a_at	1.03872e-06	4.45813e-09	-1.54507	-0.62767	1.54507	down	1983	EIF5	eukaryotic translation initiation factor 5	0006412 // translation // traceable author statement /// 0006413 // translational initiation // non-traceable author statement /// 0006413 // translational initiation // traceable author statement /// 0006446 // regulation of translational initiation // inferred from direct assay /// 0010467 // gene expression // traceable author statement /// 0044267 // cellular protein metabolic process // trac…	0005634 // nucleus // inferred from direct assay /// 0005737 // cytoplasm // inferred from direct assay /// 0005829 // cytosol // non-traceable author statement /// 0005829 // cytosol // traceable author statement /// 0005886 // plasma membrane // inferred from direct assay	0000166 // nucleotide binding // inferred from electronic annotation /// 0003743 // translation initiation factor activity // non-traceable author statement /// 0003924 // GTPase activity // traceable author statement /// 0005488 // binding // inferred from electronic annotation /// 0005515 // protein binding // inferred from physical interaction /// 0005525 // GTP binding // inferred from electr…	Translation_Factors // GenMAPP	chr14:103800338-103811362 (+) // 90.52 // q32.32
11734933_s_at	1.06138e-06	4.57686e-09	-1.64091	-0.714495	1.64091	down	6427	SRSF2	serine/arginine-rich splicing factor 2	0000381 // regulation of alternative mRNA splicing, via spliceosome // inferred from electronic annotation /// 0000398 // mRNA splicing, via spliceosome // traceable author statement /// 0006366 // transcription from RNA polymerase II promoter // traceable author statement /// 0006369 // termination of RNA polymerase II transcription // traceable author statement /// 0006397 // mRNA processing //…	0005634 // nucleus // inferred from direct assay /// 0005654 // nucleoplasm // traceable author statement /// 0005681 // spliceosomal complex // inferred from electronic annotation /// 0005737 // cytoplasm // inferred from direct assay /// 0016605 // PML body // inferred from direct assay /// 0016607 // nuclear speck // inferred from direct assay /// 0070062 // extracellular exosome // inferred f…	0000166 // nucleotide binding // inferred from electronic annotation /// 0003676 // nucleic acid binding // inferred from electronic annotation /// 0003714 // transcription corepressor activity // non-traceable author statement /// 0003723 // RNA binding // inferred from electronic annotation /// 0005515 // protein binding // inferred from physical interaction /// 0036002 // pre-mRNA binding // i…	mRNA_processing_Reactome // GenMAPP	chr17:74730209-74733413 (-) // 96.68 // q25.1
11741980_a_at	1.06332e-06	4.60677e-09	1.39625	0.481555	1.39625	up	1848	DUSP6	dual specificity phosphatase 6	0000165 // MAPK cascade // traceable author statement /// 0000186 // activation of MAPKK activity // traceable author statement /// 0000187 // activation of MAPK activity // traceable author statement /// 0000188 // inactivation of MAPK activity // inferred from direct assay /// 0001933 // negative regulation of protein phosphorylation // inferred from electronic annotation /// 0002224 // toll-li…	0005654 // nucleoplasm // traceable author statement /// 0005737 // cytoplasm // inferred from direct assay /// 0005829 // cytosol // traceable author statement	0004721 // phosphoprotein phosphatase activity // inferred from electronic annotation /// 0004725 // protein tyrosine phosphatase activity // inferred from electronic annotation /// 0005515 // protein binding // inferred from electronic annotation /// 0008138 // protein tyrosine/serine/threonine phosphatase activity // inferred from electronic annotation /// 0016787 // hydrolase activity // infer…	---	chr12:89741838-89746296 (-) // 98.67 // q21.33
11716094_a_at	1.09636e-06	4.77208e-09	1.4277	0.51369	1.4277	up	1316	KLF6	Kruppel-like factor 6	0006351 // transcription, DNA-templated // inferred from electronic annotation /// 0006355 // regulation of transcription, DNA-templated // inferred from electronic annotation /// 0016049 // cell growth // non-traceable author statement /// 0019221 // cytokine-mediated signaling pathway // inferred from electronic annotation /// 0030183 // B cell differentiation // non-traceable author statement …	0005634 // nucleus // traceable author statement /// 0005737 // cytoplasm // inferred from electronic annotation	0003676 // nucleic acid binding // inferred from electronic annotation /// 0003677 // DNA binding // inferred from electronic annotation /// 0003690 // double-stranded DNA binding // inferred from electronic annotation /// 0003700 // transcription factor activity, sequence-specific DNA binding // inferred from electronic annotation /// 0005515 // protein binding // inferred from physical interact…	---	chr10:3818745-3827474 (-) // 93.49 // p15.1
11743036_s_at	1.11332e-06	4.88917e-09	1.81177	0.857398	1.81177	up	6303	SAT1	spermidine/spermine N1-acetyltransferase 1	0001525 // angiogenesis // inferred from expression pattern /// 0006595 // polyamine metabolic process // traceable author statement /// 0006596 // polyamine biosynthetic process // traceable author statement /// 0006598 // polyamine catabolic process // inferred from electronic annotation /// 0008152 // metabolic process // inferred from electronic annotation /// 0009447 // putrescine catabolic …	0005622 // intracellular // inferred from direct assay /// 0005737 // cytoplasm // inferred from electronic annotation /// 0005829 // cytosol // traceable author statement	0004145 // diamine N-acetyltransferase activity // inferred from electronic annotation /// 0005515 // protein binding // inferred from physical interaction /// 0008080 // N-acetyltransferase activity // inferred from electronic annotation /// 0016740 // transferase activity // inferred from electronic annotation /// 0016746 // transferase activity, transferring acyl groups // inferred from electr…	Nucleotide_Metabolism // GenMAPP	---
11744763_x_at	1.11332e-06	4.891e-09	1.43025	0.516265	1.43025	up	440	ASNS	asparagine synthetase (glutamine-hydrolyzing)	0001889 // liver development // inferred from electronic annotation /// 0006520 // cellular amino acid metabolic process // inferred from electronic annotation /// 0006529 // asparagine biosynthetic process // inferred by curator /// 0006529 // asparagine biosynthetic process // inferred from direct assay /// 0006541 // glutamine metabolic process // not recorded /// 0008152 // metabolic process …	0005829 // cytosol // not recorded /// 0005829 // cytosol // traceable author statement	0000166 // nucleotide binding // inferred from electronic annotation /// 0004066 // asparagine synthase (glutamine-hydrolyzing) activity // not recorded /// 0004066 // asparagine synthase (glutamine-hydrolyzing) activity // inferred from direct assay /// 0005515 // protein binding // inferred from physical interaction /// 0005524 // ATP binding // inferred from electronic annotation /// 0016874 /…	ASPARAGINE-BIOSYNTHESIS // HumanCyc	chr7:97481437-97501788 (-) // 94.75 // q21.3
11717624_at	1.11528e-06	4.93669e-09	1.4296	0.515607	1.4296	up	26608	TBL2	transducin (beta)-like 2	0030968 // endoplasmic reticulum unfolded protein response // inferred from mutant phenotype /// 0042149 // cellular response to glucose starvation // inferred from mutant phenotype /// 0071456 // cellular response to hypoxia // inferred from mutant phenotype	0005783 // endoplasmic reticulum // inferred from direct assay /// 0030176 // integral component of endoplasmic reticulum membrane // non-traceable author statement	0005515 // protein binding // inferred from electronic annotation /// 0019901 // protein kinase binding // inferred from physical interaction /// 0031369 // translation initiation factor binding // inferred from physical interaction /// 0044822 // poly(A) RNA binding // inferred from direct assay /// 0051219 // phosphoprotein binding // inferred from direct assay	---	chr7:72983271-72993273 (-) // 78.44 // q11.23
11757391_x_at	1.11528e-06	4.94475e-09	-1.44494	-0.53101	1.44494	down	65008	MRPL1	mitochondrial ribosomal protein L1	0006412 // translation // inferred from electronic annotation /// 0006996 // organelle organization // traceable author statement /// 0032543 // mitochondrial translation // traceable author statement /// 0070124 // mitochondrial translational initiation // traceable author statement /// 0070125 // mitochondrial translational elongation // traceable author statement /// 0070126 // mitochondrial t…	0005654 // nucleoplasm // inferred from direct assay /// 0005739 // mitochondrion // inferred from electronic annotation /// 0005739 // mitochondrion // inferred from direct assay /// 0005743 // mitochondrial inner membrane // traceable author statement /// 0005840 // ribosome // inferred from electronic annotation /// 0015934 // large ribosomal subunit // inferred from electronic annotation /// …	0003723 // RNA binding // inferred from electronic annotation /// 0003735 // structural constituent of ribosome // inferred from electronic annotation /// 0005515 // protein binding // inferred from physical interaction /// 0044822 // poly(A) RNA binding // inferred from direct assay	---	chr4:78830437-78873939 (+) // 91.09 // q21.1
11715671_x_at	1.1343e-06	5.05203e-09	1.2432	0.314063	1.2432	up	8519	IFITM1	interferon induced transmembrane protein 1	0001503 // ossification // inferred from electronic annotation /// 0002376 // immune system process // inferred from electronic annotation /// 0007166 // cell surface receptor signaling pathway // traceable author statement /// 0008285 // negative regulation of cell proliferation // inferred from mutant phenotype /// 0009607 // response to biotic stimulus // inferred from electronic annotation //…	0005622 // intracellular // traceable author statement /// 0005886 // plasma membrane // traceable author statement /// 0016020 // membrane // inferred from direct assay /// 0016021 // integral component of membrane // inferred from electronic annotation	0005057 // receptor signaling protein activity // traceable author statement /// 0005515 // protein binding // inferred from physical interaction	---	chr11:313526-315272 (+) // 87.08 // p15.5
11725107_at	1.16933e-06	5.2468e-09	1.64339	0.716677	1.64339	up	1032	CDKN2D	cyclin-dependent kinase inhibitor 2D (p19, inhibits CDK4)	0000079 // regulation of cyclin-dependent protein serine/threonine kinase activity // inferred from direct assay /// 0000082 // G1/S transition of mitotic cell cycle // inferred from direct assay /// 0000278 // mitotic cell cycle // traceable author statement /// 0000731 // DNA synthesis involved in DNA repair // inferred from mutant phenotype /// 0007049 // cell cycle // inferred from electronic…	0005634 // nucleus // inferred from direct assay /// 0005654 // nucleoplasm // inferred from direct assay /// 0005737 // cytoplasm // inferred from direct assay /// 0005829 // cytosol // traceable author statement	0004861 // cyclin-dependent protein serine/threonine kinase inhibitor activity // inferred from direct assay /// 0005515 // protein binding // inferred from physical interaction /// 0016301 // kinase activity // inferred from electronic annotation /// 0019901 // protein kinase binding // inferred from physical interaction	G1_to_S_cell_cycle_Reactome // GenMAPP	chr19:10677137-10679654 (-) // 95.17 // p13.2
11725950_s_at	1.16933e-06	5.29076e-09	1.41493	0.50073	1.41493	up	8780	RIOK3	RIO kinase 3	0006468 // protein phosphorylation // inferred from electronic annotation /// 0007059 // chromosome segregation // traceable author statement /// 0016310 // phosphorylation // inferred from electronic annotation	---	0000166 // nucleotide binding // inferred from electronic annotation /// 0003824 // catalytic activity // inferred from electronic annotation /// 0004674 // protein serine/threonine kinase activity // inferred from electronic annotation /// 0005515 // protein binding // inferred from physical interaction /// 0005524 // ATP binding // inferred from electronic annotation /// 0016301 // kinase activ…	---	chr18:21032786-21063101 (+) // 91.81 // q11.2
11724093_s_at	1.16933e-06	5.29707e-09	-1.47869	-0.56432	1.47869	down	9906 /// 728661	SLC35E2 /// SLC35E2B	solute carrier family 35 member E2 /// solute carrier family 35, member E2B	0098656 // anion transmembrane transport // not recorded	0016020 // membrane // inferred from electronic annotation /// 0016021 // integral component of membrane // inferred from electronic annotation	0015297 // antiporter activity // not recorded	---	chr1:1592938-1624361 (-) // 88.93 // p36.33
11743519_at	1.16933e-06	5.31678e-09	-1.87231	-0.904818	1.87231	down	11083	DIDO1	death inducer-obliterator 1	0006351 // transcription, DNA-templated // inferred from electronic annotation /// 0006915 // apoptotic process // inferred from electronic annotation /// 0097190 // apoptotic signaling pathway // inferred from electronic annotation	0005634 // nucleus // inferred from electronic annotation /// 0005737 // cytoplasm // inferred from electronic annotation /// 0005819 // spindle // inferred from electronic annotation /// 0005856 // cytoskeleton // inferred from electronic annotation	0005515 // protein binding // inferred from electronic annotation /// 0008270 // zinc ion binding // inferred from electronic annotation /// 0044822 // poly(A) RNA binding // inferred from direct assay /// 0046872 // metal ion binding // inferred from electronic annotation	---	chr20:61509094-61569447 (-) // 96.69 // q13.33
11718546_s_at	1.16933e-06	5.32644e-09	-1.34909	-0.431985	1.34909	down	3609	ILF3	interleukin enhancer binding factor 3	0006351 // transcription, DNA-templated // inferred from electronic annotation /// 0006355 // regulation of transcription, DNA-templated // inferred from electronic annotation /// 0006468 // protein phosphorylation // inferred from direct assay /// 0017148 // negative regulation of translation // inferred from sequence or structural similarity /// 0045071 // negative regulation of viral genome re…	0005634 // nucleus // inferred from direct assay /// 0005634 // nucleus // non-traceable author statement /// 0005654 // nucleoplasm // inferred from direct assay /// 0005730 // nucleolus // inferred from direct assay /// 0005737 // cytoplasm // inferred from direct assay /// 0005739 // mitochondrion // inferred from direct assay /// 0016020 // membrane // inferred from direct assay /// 0030529 /…	0003677 // DNA binding // inferred from direct assay /// 0003723 // RNA binding // non-traceable author statement /// 0003725 // double-stranded RNA binding // inferred from direct assay /// 0005515 // protein binding // inferred from physical interaction /// 0044822 // poly(A) RNA binding // inferred from direct assay	---	chr19:10764936-10800523 (+) // 98.63 // p13.2
11716196_x_at	1.19454e-06	5.46545e-09	-1.28643	-0.363373	1.28643	down	3397	ID1	inhibitor of DNA binding 1, dominant negative helix-loop-helix protein	0000122 // negative regulation of transcription from RNA polymerase II promoter // inferred from electronic annotation /// 0001525 // angiogenesis // traceable author statement /// 0001886 // endothelial cell morphogenesis // inferred from electronic annotation /// 0006351 // transcription, DNA-templated // inferred from electronic annotation /// 0006355 // regulation of transcription, DNA-templa…	0005634 // nucleus // inferred by curator /// 0005654 // nucleoplasm // inferred from direct assay /// 0005654 // nucleoplasm // traceable author statement /// 0005737 // cytoplasm // inferred from electronic annotation /// 0005794 // Golgi apparatus // inferred from direct assay /// 0005813 // centrosome // inferred from electronic annotation	0003700 // transcription factor activity, sequence-specific DNA binding // inferred from electronic annotation /// 0005515 // protein binding // inferred from physical interaction /// 0008022 // protein C-terminus binding // inferred from electronic annotation /// 0008134 // transcription factor binding // inferred from electronic annotation /// 0042803 // protein homodimerization activity // inf…	---	chr20:30193090-30194318 (+) // 91.69 // q11.21
11723192_a_at	1.20568e-06	5.54082e-09	-1.43117	-0.517193	1.43117	down	29128	UHRF1	ubiquitin-like with PHD and ring finger domains 1	0000122 // negative regulation of transcription from RNA polymerase II promoter // inferred from direct assay /// 0006281 // DNA repair // inferred from electronic annotation /// 0006351 // transcription, DNA-templated // inferred from electronic annotation /// 0006355 // regulation of transcription, DNA-templated // inferred from electronic annotation /// 0006974 // cellular response to DNA dama…	0000790 // nuclear chromatin // inferred from direct assay /// 0000790 // nuclear chromatin // inferred from sequence or structural similarity /// 0000791 // euchromatin // inferred from direct assay /// 0000792 // heterochromatin // inferred from direct assay /// 0005634 // nucleus // inferred from direct assay /// 0005657 // replication fork // inferred from direct assay /// 0005720 // nuclear …	0000987 // core promoter proximal region sequence-specific DNA binding // inferred from direct assay /// 0003677 // DNA binding // inferred from electronic annotation /// 0003700 // transcription factor activity, sequence-specific DNA binding // traceable author statement /// 0004842 // ubiquitin-protein transferase activity // inferred from direct assay /// 0005515 // protein binding // inferred…	---	chr19:4910345-4962165 (+) // 97.11 // p13.3
11729333_at	1.23158e-06	5.6848e-09	1.55443	0.63639	1.55443	up	29943	PADI1	peptidyl arginine deiminase, type I	0018101 // protein citrullination // inferred from electronic annotation	0005737 // cytoplasm // inferred from electronic annotation /// 0070062 // extracellular exosome // inferred from direct assay	0004668 // protein-arginine deiminase activity // inferred from electronic annotation /// 0005509 // calcium ion binding // inferred from electronic annotation /// 0016787 // hydrolase activity // inferred from electronic annotation	PWY-4921 // HumanCyc	chr1:17531289-17572502 (+) // 99.31 // p36.13
11739539_a_at	1.244e-06	5.76732e-09	-1.53632	-0.619478	1.53632	down	5295	PIK3R1	phosphoinositide-3-kinase regulatory subunit 1	0001678 // cellular glucose homeostasis // inferred from sequence or structural similarity /// 0001953 // negative regulation of cell-matrix adhesion // inferred from electronic annotation /// 0006468 // protein phosphorylation // inferred from electronic annotation /// 0006644 // phospholipid metabolic process // traceable author statement /// 0006661 // phosphatidylinositol biosynthetic process…	0005634 // nucleus // inferred from sequence or structural similarity /// 0005737 // cytoplasm // inferred from direct assay /// 0005801 // cis-Golgi network // inferred from electronic annotation /// 0005829 // cytosol // traceable author statement /// 0005886 // plasma membrane // traceable author statement /// 0005911 // cell-cell junction // inferred from electronic annotation /// 0005942 // …	0005068 // transmembrane receptor protein tyrosine kinase adaptor activity // inferred from sequence or structural similarity /// 0005158 // insulin receptor binding // inferred from physical interaction /// 0005159 // insulin-like growth factor receptor binding // inferred from physical interaction /// 0005168 // neurotrophin TRKA receptor binding // inferred from physical interaction /// 000551…	---	chr5:67511603-67597647 (+) // 96.31 // q13.1
11719467_s_at	1.30531e-06	6.07795e-09	-1.37334	-0.457692	1.37334	down	26121	PRPF31	pre-mRNA processing factor 31	0000244 // spliceosomal tri-snRNP complex assembly // inferred from direct assay /// 0000244 // spliceosomal tri-snRNP complex assembly // inferred from mutant phenotype /// 0000398 // mRNA splicing, via spliceosome // inferred by curator /// 0000398 // mRNA splicing, via spliceosome // inferred from direct assay /// 0006397 // mRNA processing // inferred from electronic annotation /// 0008380 //…	0005634 // nucleus // inferred from direct assay /// 0005681 // spliceosomal complex // inferred from electronic annotation /// 0005684 // U2-type spliceosomal complex // inferred by curator /// 0005687 // U4 snRNP // inferred from direct assay /// 0005690 // U4atac snRNP // traceable author statement /// 0015030 // Cajal body // inferred from direct assay /// 0016607 // nuclear speck // inferred…	0003723 // RNA binding // inferred from electronic annotation /// 0005515 // protein binding // inferred from physical interaction /// 0030621 // U4 snRNA binding // inferred from direct assay /// 0030622 // U4atac snRNA binding // inferred from direct assay /// 0043021 // ribonucleoprotein complex binding // inferred from direct assay /// 0044822 // poly(A) RNA binding // inferred from direct as…	---	chr19:54618789-54635144 (+) // 92.09 // q13.42
11731629_a_at	1.30972e-06	6.125e-09	-1.38065	-0.465353	1.38065	down	54468	MIOS	missing oocyte, meiosis regulator, homolog (Drosophila)	0032008 // positive regulation of TOR signaling // inferred from mutant phenotype /// 0034198 // cellular response to amino acid starvation // inferred from mutant phenotype /// 0034629 // cellular protein complex localization // inferred from mutant phenotype	0005634 // nucleus // inferred from direct assay /// 0005654 // nucleoplasm // inferred from direct assay /// 0005737 // cytoplasm // inferred from direct assay /// 0005765 // lysosomal membrane // inferred from direct assay /// 0030054 // cell junction // inferred from direct assay /// 0061700 // GATOR2 complex // inferred from direct assay	0005515 // protein binding // inferred from electronic annotation	---	chr7:7606505-7647103 (+) // 98.49 // p21.3
11734684_s_at	1.32096e-06	6.22578e-09	-1.44819	-0.534255	1.44819	down	7372	UMPS	uridine monophosphate synthetase	0006206 // pyrimidine nucleobase metabolic process // traceable author statement /// 0006207 // 'de novo' pyrimidine nucleobase biosynthetic process // inferred from electronic annotation /// 0006221 // pyrimidine nucleotide biosynthetic process // inferred from electronic annotation /// 0006222 // UMP biosynthetic process // inferred from direct assay /// 0007565 // female pregnancy // inferred …	0005634 // nucleus // inferred from direct assay /// 0005737 // cytoplasm // inferred from direct assay /// 0005829 // cytosol // traceable author statement	0003824 // catalytic activity // inferred from electronic annotation /// 0004588 // orotate phosphoribosyltransferase activity // inferred from direct assay /// 0004588 // orotate phosphoribosyltransferase activity // traceable author statement /// 0004590 // orotidine-5'-phosphate decarboxylase activity // inferred from direct assay /// 0004590 // orotidine-5'-phosphate decarboxylase activity //…	PWY-5686 // HumanCyc	chr3:124449212-124464040 (+) // 73.19 // q21.2
11740253_a_at	1.32096e-06	6.23107e-09	-1.59604	-0.674498	1.59604	down	11130	ZWINT	ZW10 interacting kinetochore protein	0000070 // mitotic sister chromatid segregation // inferred from direct assay /// 0000278 // mitotic cell cycle // traceable author statement /// 0007049 // cell cycle // inferred from electronic annotation /// 0007067 // mitotic nuclear division // inferred from electronic annotation /// 0007093 // mitotic cell cycle checkpoint // inferred from direct assay /// 0007264 // small GTPase mediated s…	0000775 // chromosome, centromeric region // inferred from electronic annotation /// 0000776 // kinetochore // inferred from direct assay /// 0000777 // condensed chromosome kinetochore // inferred from electronic annotation /// 0005634 // nucleus // inferred from electronic annotation /// 0005694 // chromosome // inferred from electronic annotation /// 0005737 // cytoplasm // inferred from direc…	0005515 // protein binding // inferred from physical interaction /// 0047485 // protein N-terminus binding // inferred from physical interaction	---	chr10:58117198-58121034 (-) // 82.03 // q21.1
11721569_a_at	1.33961e-06	6.36004e-09	1.51838	0.602537	1.51838	up	283	ANG	angiogenin, ribonuclease, RNase A family, 5	0001525 // angiogenesis // inferred from direct assay /// 0001525 // angiogenesis // inferred from mutant phenotype /// 0001525 // angiogenesis // traceable author statement /// 0001541 // ovarian follicle development // non-traceable author statement /// 0001556 // oocyte maturation // non-traceable author statement /// 0001666 // response to hypoxia // inferred from direct assay /// 0001666 // …	0005576 // extracellular region // traceable author statement /// 0005578 // proteinaceous extracellular matrix // inferred from electronic annotation /// 0005604 // basement membrane // inferred from electronic annotation /// 0005605 // basal lamina // inferred from direct assay /// 0005615 // extracellular space // inferred from direct assay /// 0005634 // nucleus // inferred from direct assay …	0003676 // nucleic acid binding // inferred from electronic annotation /// 0003677 // DNA binding // inferred by curator /// 0003779 // actin binding // inferred from direct assay /// 0004518 // nuclease activity // inferred from electronic annotation /// 0004519 // endonuclease activity // traceable author statement /// 0004522 // ribonuclease A activity // non-traceable author statement /// 000…	---	chr14:21152258-21162345 (+) // 98.33 // q11.2
11722850_a_at	1.33961e-06	6.37329e-09	1.84221	0.881435	1.84221	up	330	BIRC3	baculoviral IAP repeat containing 3	0002224 // toll-like receptor signaling pathway // traceable author statement /// 0002756 // MyD88-independent toll-like receptor signaling pathway // traceable author statement /// 0006915 // apoptotic process // inferred from electronic annotation /// 0007166 // cell surface receptor signaling pathway // traceable author statement /// 0007249 // I-kappaB kinase/NF-kappaB signaling // traceable …	0005634 // nucleus // inferred from direct assay /// 0005654 // nucleoplasm // inferred from direct assay /// 0005737 // cytoplasm // inferred from direct assay /// 0005829 // cytosol // traceable author statement /// 0005876 // spindle microtubule // not recorded /// 0043234 // protein complex // inferred from electronic annotation /// 0045121 // membrane raft // inferred from electronic annotat…	0004842 // ubiquitin-protein transferase activity // inferred from direct assay /// 0004842 // ubiquitin-protein transferase activity // traceable author statement /// 0005515 // protein binding // inferred from physical interaction /// 0008270 // zinc ion binding // inferred from electronic annotation /// 0016874 // ligase activity // inferred from electronic annotation /// 0043027 // cysteine-t…	Apoptosis // GenMAPP /// Apoptosis_GenMAPP // GenMAPP	chr11:102188127-102209250 (+) // 88.29 // q22.2
11722005_a_at	1.39166e-06	6.64909e-09	-1.30813	-0.38751	1.30813	down	4678	NASP	nuclear autoantigenic sperm protein (histone-binding)	0001824 // blastocyst development // inferred from sequence or structural similarity /// 0006260 // DNA replication // inferred from sequence or structural similarity /// 0006334 // nucleosome assembly // inferred from direct assay /// 0006335 // DNA replication-dependent nucleosome assembly // inferred from direct assay /// 0006336 // DNA replication-independent nucleosome assembly // inferred f…	0000790 // nuclear chromatin // inferred from direct assay /// 0005634 // nucleus // inferred from sequence or structural similarity /// 0005654 // nucleoplasm // inferred from direct assay /// 0005737 // cytoplasm // inferred from electronic annotation /// 0043234 // protein complex // inferred from direct assay	0005515 // protein binding // inferred from physical interaction /// 0032403 // protein complex binding // inferred from direct assay /// 0042393 // histone binding // inferred from electronic annotation /// 0051879 // Hsp90 protein binding // inferred from sequence or structural similarity	---	chr1:46049659-46084567 (+) // 96.6 // p34.1
11716093_a_at	1.39432e-06	6.69001e-09	1.36119	0.444873	1.36119	up	1316	KLF6	Kruppel-like factor 6	0006351 // transcription, DNA-templated // inferred from electronic annotation /// 0006355 // regulation of transcription, DNA-templated // inferred from electronic annotation /// 0016049 // cell growth // non-traceable author statement /// 0019221 // cytokine-mediated signaling pathway // inferred from electronic annotation /// 0030183 // B cell differentiation // non-traceable author statement …	0005634 // nucleus // traceable author statement /// 0005737 // cytoplasm // inferred from electronic annotation	0003676 // nucleic acid binding // inferred from electronic annotation /// 0003677 // DNA binding // inferred from electronic annotation /// 0003690 // double-stranded DNA binding // inferred from electronic annotation /// 0003700 // transcription factor activity, sequence-specific DNA binding // inferred from electronic annotation /// 0005515 // protein binding // inferred from physical interact…	---	chr10:3818745-3827474 (-) // 93.49 // p15.1
11746009_a_at	1.39583e-06	6.75819e-09	-1.40085	-0.4863	1.40085	down	39	ACAT2	acetyl-CoA acetyltransferase 2	0006629 // lipid metabolic process // inferred by curator /// 0008152 // metabolic process // inferred from electronic annotation	0005634 // nucleus // inferred from direct assay /// 0005654 // nucleoplasm // inferred from direct assay /// 0005730 // nucleolus // inferred from direct assay /// 0005737 // cytoplasm // inferred from direct assay /// 0070062 // extracellular exosome // inferred from direct assay	0003824 // catalytic activity // inferred from electronic annotation /// 0003985 // acetyl-CoA C-acetyltransferase activity // inferred from direct assay /// 0005515 // protein binding // inferred from physical interaction /// 0016740 // transferase activity // inferred from electronic annotation /// 0016746 // transferase activity, transferring acyl groups // inferred from electronic annotation …	P163-PWY // HumanCyc /// PWY-5177 // HumanCyc /// PWY-922 // HumanCyc	chr6:160183510-160200144 (+) // 99.48 // q25.3
11716808_a_at	1.39583e-06	6.76569e-09	-1.36845	-0.452547	1.36845	down	3704	ITPA	inosine triphosphatase (nucleoside triphosphate pyrophosphatase)	0006193 // ITP catabolic process // inferred from electronic annotation /// 0009117 // nucleotide metabolic process // inferred from electronic annotation /// 0009143 // nucleoside triphosphate catabolic process // inferred from electronic annotation /// 0009204 // deoxyribonucleoside triphosphate catabolic process // inferred from electronic annotation /// 0044281 // small molecule metabolic pro…	0005737 // cytoplasm // inferred from direct assay /// 0005829 // cytosol // traceable author statement	0000166 // nucleotide binding // inferred from electronic annotation /// 0016787 // hydrolase activity // inferred from electronic annotation /// 0035870 // dITP diphosphatase activity // not recorded /// 0036220 // ITP diphosphatase activity // not recorded /// 0036222 // XTP diphosphatase activity // not recorded /// 0046872 // metal ion binding // inferred from electronic annotation /// 004742…	---	chr20:3190022-3204506 (+) // 79.43 // p13
11722300_a_at	1.39583e-06	6.78206e-09	1.60924	0.686382	1.60924	up	2113	ETS1	v-ets avian erythroblastosis virus E26 oncogene homolog 1	0001666 // response to hypoxia // inferred from electronic annotation /// 0002376 // immune system process // inferred from electronic annotation /// 0006351 // transcription, DNA-templated // inferred from electronic annotation /// 0006355 // regulation of transcription, DNA-templated // inferred from electronic annotation /// 0006357 // regulation of transcription from RNA polymerase II promote…	0005634 // nucleus // inferred from direct assay /// 0005634 // nucleus // inferred from mutant phenotype /// 0005654 // nucleoplasm // inferred from direct assay /// 0005654 // nucleoplasm // traceable author statement /// 0005667 // transcription factor complex // inferred from electronic annotation /// 0005737 // cytoplasm // inferred from electronic annotation /// 0045171 // intercellular bri…	0000981 // RNA polymerase II transcription factor activity, sequence-specific DNA binding // not recorded /// 0003677 // DNA binding // inferred from sequence or structural similarity /// 0003700 // transcription factor activity, sequence-specific DNA binding // inferred from direct assay /// 0005515 // protein binding // inferred from physical interaction /// 0008134 // transcription factor bind…	---	chr11:128328661-128392277 (-) // 94.14 // q24.3
11717015_a_at	1.41422e-06	6.90001e-09	1.29361	0.3714	1.29361	up	1366	CLDN7	claudin 7	0002230 // positive regulation of defense response to virus by host // inferred from mutant phenotype /// 0016338 // calcium-independent cell-cell adhesion via plasma membrane cell-adhesion molecules // inferred from sequence or structural similarity /// 0098792 // xenophagy // inferred from mutant phenotype	0005886 // plasma membrane // inferred from electronic annotation /// 0005923 // bicellular tight junction // inferred from sequence or structural similarity /// 0016020 // membrane // inferred from electronic annotation /// 0016021 // integral component of membrane // inferred from electronic annotation /// 0016323 // basolateral plasma membrane // inferred from electronic annotation /// 0016328…	0005198 // structural molecule activity // inferred from electronic annotation /// 0005515 // protein binding // inferred from physical interaction /// 0042802 // identical protein binding // inferred from sequence or structural similarity	---	chr17:7163221-7166518 (-) // 93.56 // p13.1
11718891_s_at	1.41835e-06	6.94891e-09	1.34256	0.424985	1.34256	up	2309 /// 2310	FOXO3 /// FOXO3B	forkhead box O3 /// forkhead box O3B pseudogene	0000122 // negative regulation of transcription from RNA polymerase II promoter // inferred from direct assay /// 0000122 // negative regulation of transcription from RNA polymerase II promoter // inferred from mutant phenotype /// 0001542 // ovulation from ovarian follicle // inferred from electronic annotation /// 0001544 // initiation of primordial ovarian follicle growth // inferred from elec…	0005634 // nucleus // inferred from direct assay /// 0005654 // nucleoplasm // inferred from direct assay /// 0005654 // nucleoplasm // traceable author statement /// 0005737 // cytoplasm // inferred from direct assay /// 0005829 // cytosol // traceable author statement /// 0016020 // membrane // inferred from electronic annotation	0000981 // RNA polymerase II transcription factor activity, sequence-specific DNA binding // not recorded /// 0001047 // core promoter binding // inferred from sequence or structural similarity /// 0001221 // transcription cofactor binding // inferred from electronic annotation /// 0001227 // transcriptional repressor activity, RNA polymerase II transcription regulatory region sequence-specific b…	---	chr6:108881487-109006388 (+) // 94.74 // q21
11726611_x_at	1.47493e-06	7.25596e-09	1.69734	0.763273	1.69734	up	23764	MAFF	v-maf avian musculoaponeurotic fibrosarcoma oncogene homolog F	0001701 // in utero embryonic development // inferred from electronic annotation /// 0006351 // transcription, DNA-templated // inferred from electronic annotation /// 0006355 // regulation of transcription, DNA-templated // inferred from electronic annotation /// 0006357 // regulation of transcription from RNA polymerase II promoter // not recorded /// 0006366 // transcription from RNA polymeras…	0005634 // nucleus // inferred from direct assay /// 0005654 // nucleoplasm // traceable author statement /// 0005739 // mitochondrion // inferred from direct assay	0001228 // transcriptional activator activity, RNA polymerase II transcription regulatory region sequence-specific binding // not recorded /// 0003677 // DNA binding // inferred from electronic annotation /// 0003700 // transcription factor activity, sequence-specific DNA binding // inferred from electronic annotation /// 0043565 // sequence-specific DNA binding // inferred from electronic annota…	Smooth_muscle_contraction // GenMAPP	chr22:38597888-38612518 (+) // 77.85 // q13.1
11757862_x_at	1.5055e-06	7.43684e-09	-1.4173	-0.503145	1.4173	down	7448	VTN	vitronectin	0006898 // receptor-mediated endocytosis // inferred from electronic annotation /// 0006955 // immune response // traceable author statement /// 0007155 // cell adhesion // traceable author statement /// 0007160 // cell-matrix adhesion // inferred from direct assay /// 0010811 // positive regulation of cell-substrate adhesion // inferred from electronic annotation /// 0010951 // negative regulati…	0005576 // extracellular region // non-traceable author statement /// 0005576 // extracellular region // traceable author statement /// 0005578 // proteinaceous extracellular matrix // inferred from electronic annotation /// 0005615 // extracellular space // inferred from direct assay /// 0031012 // extracellular matrix // inferred from direct assay /// 0031012 // extracellular matrix // inferred…	0005044 // scavenger receptor activity // inferred from electronic annotation /// 0005178 // integrin binding // inferred from direct assay /// 0005178 // integrin binding // inferred from physical interaction /// 0005515 // protein binding // inferred from physical interaction /// 0008201 // heparin binding // inferred from electronic annotation /// 0030247 // polysaccharide binding // inferred …	Inflammatory_Response_Pathway // GenMAPP	chr17:26694319-26695044 (-) // 95.07 // q11.2
11719123_a_at	1.50858e-06	7.48259e-09	-1.42805	-0.514047	1.42805	down	8914	TIMELESS	timeless circadian clock	0000122 // negative regulation of transcription from RNA polymerase II promoter // inferred from electronic annotation /// 0000724 // double-strand break repair via homologous recombination // traceable author statement /// 0002009 // morphogenesis of an epithelium // inferred from sequence or structural similarity /// 0006281 // DNA repair // traceable author statement /// 0006302 // double-stra…	0000790 // nuclear chromatin // inferred from direct assay /// 0005634 // nucleus // inferred by curator /// 0005634 // nucleus // inferred from direct assay /// 0005654 // nucleoplasm // traceable author statement /// 0005730 // nucleolus // inferred from direct assay /// 0015630 // microtubule cytoskeleton // inferred from direct assay	0005515 // protein binding // inferred from physical interaction /// 0042803 // protein homodimerization activity // inferred from electronic annotation /// 0046982 // protein heterodimerization activity // inferred from electronic annotation	---	chr12:56810157-56843191 (-) // 91.81 // q13.3
11721884_s_at	1.52517e-06	7.59576e-09	-1.54478	-0.6274	1.54478	down	10426 /// 104355135	TUBGCP3 /// LINC00431	tubulin, gamma complex associated protein 3 /// long intergenic non-protein coding RNA 431	0000086 // G2/M transition of mitotic cell cycle // traceable author statement /// 0000226 // microtubule cytoskeleton organization // inferred from electronic annotation /// 0000278 // mitotic cell cycle // traceable author statement /// 0007020 // microtubule nucleation // non-traceable author statement /// 0007126 // meiotic nuclear division // not recorded /// 0007338 // single fertilization …	0000922 // spindle pole // inferred from electronic annotation /// 0000923 // equatorial microtubule organizing center // not recorded /// 0005737 // cytoplasm // inferred from direct assay /// 0005813 // centrosome // inferred from direct assay /// 0005813 // centrosome // non-traceable author statement /// 0005814 // centriole // inferred from direct assay /// 0005815 // microtubule organizing …	0005198 // structural molecule activity // non-traceable author statement /// 0005200 // structural constituent of cytoskeleton // not recorded /// 0005200 // structural constituent of cytoskeleton // non-traceable author statement /// 0005515 // protein binding // inferred from physical interaction /// 0043015 // gamma-tubulin binding // inferred from direct assay /// 0051011 // microtubule minu…	---	chr13:113139322-113242499 (-) // 99.44 // q34
11716522_x_at	1.53382e-06	7.66987e-09	1.67839	0.747077	1.67839	up	11067	C10orf10	chromosome 10 open reading frame 10	---	0005737 // cytoplasm // inferred from electronic annotation /// 0005739 // mitochondrion // inferred from direct assay	---	---	chr10:45471576-45474360 (-) // 91.47 // q11.21
11720570_a_at	1.53438e-06	7.70376e-09	-1.58769	-0.666933	1.58769	down	23338	JADE2	jade family PHD finger 2	0043966 // histone H3 acetylation // inferred from direct assay /// 0043981 // histone H4-K5 acetylation // inferred from direct assay /// 0043982 // histone H4-K8 acetylation // inferred from direct assay /// 0043983 // histone H4-K12 acetylation // inferred from direct assay /// 0043984 // histone H4-K16 acetylation // inferred from direct assay /// 0060395 // SMAD protein signal transduction /…	0000123 // histone acetyltransferase complex // inferred from direct assay /// 0005654 // nucleoplasm // inferred from direct assay /// 0070062 // extracellular exosome // inferred from direct assay	0005515 // protein binding // inferred from physical interaction /// 0008270 // zinc ion binding // inferred from electronic annotation /// 0046872 // metal ion binding // inferred from electronic annotation	---	chr5:133861797-133918917 (+) // 98.62 // q31.1
11753046_x_at	1.53641e-06	7.76705e-09	1.55438	0.63634	1.55438	up	10150	MBNL2	muscleblind-like splicing regulator 2	0006397 // mRNA processing // inferred from electronic annotation /// 0008380 // RNA splicing // inferred from electronic annotation /// 0043484 // regulation of RNA splicing // inferred from direct assay	0005634 // nucleus // inferred from electronic annotation /// 0005737 // cytoplasm // inferred from electronic annotation	0003723 // RNA binding // inferred from electronic annotation /// 0044822 // poly(A) RNA binding // inferred from direct assay /// 0046872 // metal ion binding // inferred from electronic annotation	---	chr13:97928414-98043815 (+) // 100.0 // q32.1
11750168_x_at	1.53641e-06	7.77616e-09	1.36109	0.444757	1.36109	up	2746	GLUD1	glutamate dehydrogenase 1	0006520 // cellular amino acid metabolic process // inferred from electronic annotation /// 0006537 // glutamate biosynthetic process // inferred from direct assay /// 0006538 // glutamate catabolic process // inferred from direct assay /// 0006541 // glutamine metabolic process // inferred from sequence or structural similarity /// 0008652 // cellular amino acid biosynthetic process // traceable…	0005737 // cytoplasm // inferred from direct assay /// 0005739 // mitochondrion // inferred from direct assay /// 0005759 // mitochondrial matrix // traceable author statement	0000166 // nucleotide binding // inferred from electronic annotation /// 0004352 // glutamate dehydrogenase (NAD+) activity // inferred from direct assay /// 0004353 // glutamate dehydrogenase [NAD(P)+] activity // inferred from direct assay /// 0005515 // protein binding // inferred from physical interaction /// 0005524 // ATP binding // inferred from electronic annotation /// 0005525 // GTP bin…	ARGININE-SYN4-PWY // HumanCyc /// GLUTAMATE-SYN2-PWY // HumanCyc /// PROLINE-SYN2-PWY // HumanCyc /// PWY-5766 // HumanCyc	chrX:120181437-120183377 (+) // 97.28 // q24 /// chr10:88811345-88854627 (-) // 99.83 // q23.2
11734724_a_at	1.54376e-06	7.84461e-09	1.48488	0.570347	1.48488	up	3664	IRF6	interferon regulatory factor 6	0006351 // transcription, DNA-templated // inferred from electronic annotation /// 0006355 // regulation of transcription, DNA-templated // inferred from electronic annotation /// 0007050 // cell cycle arrest // inferred from direct assay /// 0008285 // negative regulation of cell proliferation // inferred from direct assay /// 0019221 // cytokine-mediated signaling pathway // traceable author st…	0005634 // nucleus // inferred from electronic annotation /// 0005737 // cytoplasm // inferred from direct assay /// 0005829 // cytosol // traceable author statement /// 0070062 // extracellular exosome // inferred from direct assay	0000975 // regulatory region DNA binding // inferred from electronic annotation /// 0003677 // DNA binding // inferred from sequence or structural similarity /// 0003700 // transcription factor activity, sequence-specific DNA binding // inferred from sequence or structural similarity /// 0005515 // protein binding // inferred from physical interaction	Apoptosis // GenMAPP	chr1:209960619-209979510 (-) // 91.73 // q32.2
11715774_s_at	1.54604e-06	7.8875e-09	-1.39287	-0.47806	1.39287	down	55272	IMP3	IMP3, U3 small nucleolar ribonucleoprotein	0006364 // rRNA processing // not recorded /// 0042254 // ribosome biogenesis // inferred from electronic annotation /// 0045903 // positive regulation of translational fidelity // not recorded	0005622 // intracellular // inferred from electronic annotation /// 0005634 // nucleus // inferred from direct assay /// 0005730 // nucleolus // inferred from direct assay /// 0015935 // small ribosomal subunit // not recorded /// 0030529 // ribonucleoprotein complex // inferred from electronic annotation /// 0032040 // small-subunit processome // not recorded /// 0034457 // Mpp10 complex // not …	0003723 // RNA binding // inferred from electronic annotation /// 0003735 // structural constituent of ribosome // not recorded /// 0005515 // protein binding // inferred from physical interaction /// 0019843 // rRNA binding // not recorded /// 0030515 // snoRNA binding // not recorded /// 0044822 // poly(A) RNA binding // inferred from direct assay	---	chr15:75931433-75933032 (-) // 93.43 // q24.2
11753232_a_at	1.56599e-06	8.02094e-09	1.82011	0.864023	1.82011	up	10397	NDRG1	N-myc downstream regulated 1	0008285 // negative regulation of cell proliferation // inferred from electronic annotation /// 0010038 // response to metal ion // traceable author statement /// 0030330 // DNA damage response, signal transduction by p53 class mediator // inferred from expression pattern /// 0032287 // peripheral nervous system myelin maintenance // inferred from electronic annotation /// 0042127 // regulation o…	0005634 // nucleus // inferred from direct assay /// 0005737 // cytoplasm // inferred from direct assay /// 0005813 // centrosome // inferred from direct assay /// 0005815 // microtubule organizing center // inferred from electronic annotation /// 0005829 // cytosol // inferred from electronic annotation /// 0005856 // cytoskeleton // inferred from electronic annotation /// 0005874 // microtubule…	0005515 // protein binding // inferred from physical interaction /// 0008017 // microtubule binding // inferred from direct assay /// 0017137 // Rab GTPase binding // inferred from direct assay /// 0043015 // gamma-tubulin binding // inferred from direct assay /// 0045296 // cadherin binding // inferred from direct assay	---	chr8:134260954-134309495 (-) // 69.02 // q24.22
11723262_at	1.56893e-06	8.07804e-09	1.65434	0.726255	1.65434	up	196394	AMN1	antagonist of mitotic exit network 1 homolog	0018022 // peptidyl-lysine methylation // inferred from mutant phenotype /// 0018023 // peptidyl-lysine trimethylation // inferred from mutant phenotype /// 0032259 // methylation // inferred from electronic annotation /// 1904733 // negative regulation of electron carrier activity // inferred from mutant phenotype /// 1904736 // negative regulation of fatty acid beta-oxidation using acyl-CoA deh…	0005737 // cytoplasm // inferred from electronic annotation /// 0005739 // mitochondrion // inferred from electronic annotation /// 0005759 // mitochondrial matrix // inferred from direct assay /// 0005759 // mitochondrial matrix // inferred from electronic annotation	0008168 // methyltransferase activity // inferred from electronic annotation /// 0016279 // protein-lysine N-methyltransferase activity // inferred from mutant phenotype /// 0016740 // transferase activity // inferred from electronic annotation	---	chr12:31824081-31882108 (-) // 98.13 // p11.21
11722355_s_at	1.56893e-06	8.09957e-09	-1.43893	-0.525	1.43893	down	1601	DAB2	Dab, mitogen-responsive phosphoprotein, homolog 2 (Drosophila)	0000904 // cell morphogenesis involved in differentiation // inferred from electronic annotation /// 0001701 // in utero embryonic development // inferred from electronic annotation /// 0001921 // positive regulation of receptor recycling // inferred from electronic annotation /// 0001934 // positive regulation of protein phosphorylation // inferred from mutant phenotype /// 0006810 // transport …	0005634 // nucleus // inferred from electronic annotation /// 0005730 // nucleolus // inferred from direct assay /// 0005737 // cytoplasm // inferred from electronic annotation /// 0005765 // lysosomal membrane // traceable author statement /// 0005886 // plasma membrane // inferred from direct assay /// 0005886 // plasma membrane // traceable author statement /// 0005905 // coated pit // inferre…	0005178 // integrin binding // inferred from electronic annotation /// 0005515 // protein binding // inferred from physical interaction /// 0005546 // phosphatidylinositol-4,5-bisphosphate binding // inferred from electronic annotation /// 0008022 // protein C-terminus binding // inferred from physical interaction /// 0030276 // clathrin binding // inferred from electronic annotation /// 0035091 …	---	chr5:39371779-39425467 (-) // 99.2 // p13.1
11717462_s_at	1.57779e-06	8.19185e-09	-1.32362	-0.404485	1.32362	down	54888	NSUN2	NOP2/Sun RNA methyltransferase family member 2	0006400 // tRNA modification // traceable author statement /// 0007049 // cell cycle // inferred from electronic annotation /// 0007067 // mitotic nuclear division // inferred from electronic annotation /// 0007286 // spermatid development // inferred from electronic annotation /// 0008033 // tRNA processing // traceable author statement /// 0010467 // gene expression // traceable author statemen…	0005634 // nucleus // inferred from direct assay /// 0005654 // nucleoplasm // traceable author statement /// 0005730 // nucleolus // inferred from direct assay /// 0005737 // cytoplasm // inferred from direct assay /// 0005819 // spindle // inferred from electronic annotation /// 0005856 // cytoskeleton // inferred from electronic annotation /// 0033391 // chromatoid body // inferred from electr…	0000049 // tRNA binding // not recorded /// 0003723 // RNA binding // inferred from electronic annotation /// 0008168 // methyltransferase activity // inferred from electronic annotation /// 0016428 // tRNA (cytosine-5-)-methyltransferase activity // inferred from direct assay /// 0016740 // transferase activity // inferred from electronic annotation /// 0044822 // poly(A) RNA binding // inferred…	---	chr5:6599351-6633473 (-) // 57.24 // p15.31
11754925_a_at	1.57779e-06	8.20915e-09	-1.6905	-0.757448	1.6905	down	6850	SYK	spleen tyrosine kinase	0000187 // activation of MAPK activity // inferred from electronic annotation /// 0001525 // angiogenesis // inferred from electronic annotation /// 0001820 // serotonin secretion // inferred from electronic annotation /// 0001945 // lymph vessel development // inferred from sequence or structural similarity /// 0002092 // positive regulation of receptor internalization // inferred from electroni…	0005634 // nucleus // inferred from direct assay /// 0005737 // cytoplasm // inferred from direct assay /// 0005829 // cytosol // inferred by curator /// 0005829 // cytosol // traceable author statement /// 0005886 // plasma membrane // traceable author statement /// 0016020 // membrane // inferred from electronic annotation /// 0019815 // B cell receptor complex // inferred from electronic annot…	0000166 // nucleotide binding // inferred from electronic annotation /// 0004672 // protein kinase activity // inferred from direct assay /// 0004672 // protein kinase activity // non-traceable author statement /// 0004674 // protein serine/threonine kinase activity // inferred from direct assay /// 0004713 // protein tyrosine kinase activity // not recorded /// 0004713 // protein tyrosine kinase…	---	chr9:93564011-93658485 (+) // 98.96 // q22.2
11756392_a_at	1.58527e-06	8.28019e-09	-1.31659	-0.39681	1.31659	down	51693	TRAPPC2L	trafficking protein particle complex 2-like	0006810 // transport // inferred from electronic annotation /// 0006888 // ER to Golgi vesicle-mediated transport // traceable author statement /// 0016192 // vesicle-mediated transport // inferred from electronic annotation /// 0018279 // protein N-linked glycosylation via asparagine // traceable author statement /// 0043687 // post-translational protein modification // traceable author statemen…	0000139 // Golgi membrane // traceable author statement /// 0005622 // intracellular // inferred from electronic annotation /// 0005737 // cytoplasm // inferred from direct assay /// 0005783 // endoplasmic reticulum // inferred from electronic annotation /// 0005794 // Golgi apparatus // inferred from electronic annotation /// 0005829 // cytosol // traceable author statement /// 0043231 // intrac…	0005515 // protein binding // inferred from physical interaction	---	chr16:88923531-88927657 (+) // 97.86 // q24.3
11737041_a_at	1.59727e-06	8.3925e-09	1.35599	0.43935	1.35599	up	90102	PHLDB2	pleckstrin homology-like domain, family B, member 2	0000226 // microtubule cytoskeleton organization // inferred from mutant phenotype /// 0006629 // lipid metabolic process // inferred from electronic annotation /// 0007165 // signal transduction // inferred from electronic annotation /// 0010470 // regulation of gastrulation // inferred from mutant phenotype /// 0010717 // regulation of epithelial to mesenchymal transition // inferred from mutan…	0005737 // cytoplasm // inferred from direct assay /// 0005886 // plasma membrane // inferred from direct assay /// 0005925 // focal adhesion // inferred from direct assay /// 0016020 // membrane // inferred from electronic annotation /// 0016021 // integral component of membrane // inferred from electronic annotation /// 0031252 // cell leading edge // inferred from direct assay /// 0045111 // i…	0004871 // signal transducer activity // inferred from electronic annotation /// 0005515 // protein binding // inferred from physical interaction /// 0008081 // phosphoric diester hydrolase activity // inferred from electronic annotation /// 0016787 // hydrolase activity // inferred from electronic annotation	---	chr3:111578567-111695362 (+) // 99.26 // q13.2
11759554_at	1.59727e-06	8.40754e-09	1.71525	0.778423	1.71525	up	10914	PAPOLA	poly(A) polymerase alpha	0000398 // mRNA splicing, via spliceosome // traceable author statement /// 0006366 // transcription from RNA polymerase II promoter // traceable author statement /// 0006369 // termination of RNA polymerase II transcription // traceable author statement /// 0006378 // mRNA polyadenylation // inferred from direct assay /// 0006397 // mRNA processing // inferred from electronic annotation /// 0008…	0005634 // nucleus // traceable author statement /// 0005654 // nucleoplasm // inferred from direct assay /// 0005654 // nucleoplasm // traceable author statement /// 0005737 // cytoplasm // traceable author statement	0000166 // nucleotide binding // inferred from electronic annotation /// 0000287 // magnesium ion binding // inferred from sequence or structural similarity /// 0003723 // RNA binding // inferred from electronic annotation /// 0004652 // polynucleotide adenylyltransferase activity // not recorded /// 0004652 // polynucleotide adenylyltransferase activity // inferred from direct assay /// 0004652 …	mRNA_processing_Reactome // GenMAPP	chr14:96968726-97001227 (+) // 91.61 // q32.2
11723282_a_at	1.60083e-06	8.45867e-09	1.30988	0.38944	1.30988	up	634	CEACAM1	carcinoembryonic antigen-related cell adhesion molecule 1 (biliary glycoprotein)	0001525 // angiogenesis // non-traceable author statement /// 0007156 // homophilic cell adhesion via plasma membrane adhesion molecules // non-traceable author statement /// 0007229 // integrin-mediated signaling pathway // non-traceable author statement /// 0007596 // blood coagulation // traceable author statement /// 0016477 // cell migration // non-traceable author statement /// 0050900 // l…	0005576 // extracellular region // inferred from electronic annotation /// 0005886 // plasma membrane // traceable author statement /// 0005887 // integral component of plasma membrane // non-traceable author statement /// 0016020 // membrane // traceable author statement /// 0016021 // integral component of membrane // inferred from direct assay /// 0070062 // extracellular exosome // inferred f…	0005515 // protein binding // inferred from physical interaction /// 0042803 // protein homodimerization activity // inferred from mutant phenotype	---	chr19:43011457-43032661 (-) // 98.92 // q13.2
11719047_s_at	1.61679e-06	8.613e-09	1.30674	0.385968	1.30674	up	7465	WEE1	WEE1 G2 checkpoint kinase	0000082 // G1/S transition of mitotic cell cycle // traceable author statement /// 0000086 // G2/M transition of mitotic cell cycle // traceable author statement /// 0000226 // microtubule cytoskeleton organization // inferred from electronic annotation /// 0000278 // mitotic cell cycle // traceable author statement /// 0006468 // protein phosphorylation // inferred from electronic annotation ///…	0005634 // nucleus // traceable author statement /// 0005654 // nucleoplasm // traceable author statement /// 0005730 // nucleolus // inferred from direct assay /// 0005737 // cytoplasm // inferred from electronic annotation	0000166 // nucleotide binding // inferred from electronic annotation /// 0000287 // magnesium ion binding // inferred from electronic annotation /// 0004672 // protein kinase activity // inferred from electronic annotation /// 0004674 // protein serine/threonine kinase activity // inferred from electronic annotation /// 0004713 // protein tyrosine kinase activity // traceable author statement ///…	Cell_cycle_KEGG // GenMAPP /// G1_to_S_cell_cycle_Reactome // GenMAPP	chr11:9595191-9611531 (+) // 92.6 // p15.4
11756666_x_at	1.61679e-06	8.62765e-09	-1.47898	-0.564605	1.47898	down	4171	MCM2	minichromosome maintenance complex component 2	0000082 // G1/S transition of mitotic cell cycle // traceable author statement /// 0000278 // mitotic cell cycle // traceable author statement /// 0006260 // DNA replication // traceable author statement /// 0006268 // DNA unwinding involved in DNA replication // inferred from electronic annotation /// 0006270 // DNA replication initiation // inferred from mutant phenotype /// 0006271 // DNA stra…	0000784 // nuclear chromosome, telomeric region // inferred from direct assay /// 0000785 // chromatin // inferred from direct assay /// 0005634 // nucleus // inferred from direct assay /// 0005654 // nucleoplasm // inferred from direct assay /// 0005654 // nucleoplasm // traceable author statement /// 0005664 // nuclear origin of replication recognition complex // inferred from electronic annota…	0000166 // nucleotide binding // inferred from electronic annotation /// 0003677 // DNA binding // traceable author statement /// 0003678 // DNA helicase activity // inferred from electronic annotation /// 0003688 // DNA replication origin binding // inferred from electronic annotation /// 0004386 // helicase activity // inferred from electronic annotation /// 0005515 // protein binding // inferr…	Cell_cycle_KEGG // GenMAPP /// DNA_replication_Reactome // GenMAPP /// G1_to_S_cell_cycle_Reactome // GenMAPP	chr3:127317252-127341279 (+) // 98.65 // q21.3
11728972_a_at	1.61679e-06	8.65492e-09	1.80493	0.851945	1.80493	up	5795	PTPRJ	protein tyrosine phosphatase, receptor type, J	0001570 // vasculogenesis // inferred from electronic annotation /// 0001954 // positive regulation of cell-matrix adhesion // inferred from electronic annotation /// 0006470 // protein dephosphorylation // inferred from electronic annotation /// 0007507 // heart development // inferred from electronic annotation /// 0007596 // blood coagulation // inferred from electronic annotation /// 0008285 …	0001772 // immunological synapse // inferred from direct assay /// 0005654 // nucleoplasm // inferred from direct assay /// 0005886 // plasma membrane // inferred from direct assay /// 0005886 // plasma membrane // traceable author statement /// 0005887 // integral component of plasma membrane // traceable author statement /// 0005911 // cell-cell junction // inferred from direct assay /// 000998…	0004721 // phosphoprotein phosphatase activity // inferred from electronic annotation /// 0004725 // protein tyrosine phosphatase activity // inferred from direct assay /// 0004725 // protein tyrosine phosphatase activity // inferred from mutant phenotype /// 0005161 // platelet-derived growth factor receptor binding // inferred from physical interaction /// 0005515 // protein binding // inferred…	---	chr11:48002109-48154264 (+) // 73.24 // p11.2
11720665_s_at	1.61679e-06	8.67396e-09	-1.36273	-0.4465	1.36273	down	10492	SYNCRIP	synaptotagmin binding, cytoplasmic RNA interacting protein	0000398 // mRNA splicing, via spliceosome // inferred by curator /// 0001649 // osteoblast differentiation // inferred from direct assay /// 0006396 // RNA processing // traceable author statement /// 0006397 // mRNA processing // inferred from electronic annotation /// 0006417 // regulation of translation // inferred from electronic annotation /// 0008380 // RNA splicing // traceable author stat…	0005634 // nucleus // traceable author statement /// 0005654 // nucleoplasm // inferred from electronic annotation /// 0005681 // spliceosomal complex // inferred from electronic annotation /// 0005737 // cytoplasm // inferred from electronic annotation /// 0005783 // endoplasmic reticulum // inferred from electronic annotation /// 0016020 // membrane // inferred from direct assay /// 0019013 // …	0000166 // nucleotide binding // inferred from electronic annotation /// 0003676 // nucleic acid binding // inferred from electronic annotation /// 0003723 // RNA binding // traceable author statement /// 0005515 // protein binding // inferred from physical interaction /// 0008143 // poly(A) binding // inferred from electronic annotation /// 0044822 // poly(A) RNA binding // inferred from direct …	---	chr6:86323502-86353046 (-) // 92.96 // q14.3
11716629_at	1.63214e-06	8.80235e-09	1.35433	0.437575	1.35433	up	51278	IER5	immediate early response 5	---	---	---	---	chr1:181057637-181060385 (+) // 94.92 // q25.3
11715978_a_at	1.63214e-06	8.82847e-09	1.29582	0.373865	1.29582	up	50854	C6orf48	chromosome 6 open reading frame 48	---	---	---	---	chr6:31802384-31807541 (+) // 92.69 // p21.33
11734183_x_at	1.63214e-06	8.85544e-09	-1.30836	-0.387755	1.30836	down	1015	CDH17	cadherin 17, LI cadherin (liver-intestine)	0006810 // transport // non-traceable author statement /// 0006857 // oligopeptide transport // inferred from sequence or structural similarity /// 0007155 // cell adhesion // traceable author statement /// 0007156 // homophilic cell adhesion via plasma membrane adhesion molecules // inferred from sequence or structural similarity /// 0016339 // calcium-dependent cell-cell adhesion via plasma mem…	0005886 // plasma membrane // traceable author statement /// 0016020 // membrane // inferred from electronic annotation /// 0016021 // integral component of membrane // inferred from electronic annotation /// 0016323 // basolateral plasma membrane // inferred from direct assay	0005215 // transporter activity // traceable author statement /// 0005427 // proton-dependent oligopeptide secondary active transmembrane transporter activity // inferred from sequence or structural similarity /// 0005509 // calcium ion binding // inferred from electronic annotation /// 0005515 // protein binding // inferred from electronic annotation /// 0046872 // metal ion binding // inferred …	---	chr8:95139393-95220815 (-) // 92.43 // q22.1
11742819_at	1.63466e-06	8.90216e-09	1.50968	0.59424	1.50968	up	5329	PLAUR	plasminogen activator, urokinase receptor	0001934 // positive regulation of protein phosphorylation // inferred from mutant phenotype /// 0006501 // C-terminal protein lipidation // traceable author statement /// 0006928 // movement of cell or subcellular component // non-traceable author statement /// 0006935 // chemotaxis // traceable author statement /// 0007165 // signal transduction // traceable author statement /// 0007596 // blood…	0005576 // extracellular region // inferred from electronic annotation /// 0005788 // endoplasmic reticulum lumen // traceable author statement /// 0005789 // endoplasmic reticulum membrane // traceable author statement /// 0005886 // plasma membrane // inferred from direct assay /// 0005886 // plasma membrane // traceable author statement /// 0005887 // integral component of plasma membrane // i…	0004872 // receptor activity // non-traceable author statement /// 0005102 // receptor binding // inferred from physical interaction /// 0005515 // protein binding // inferred from physical interaction /// 0019899 // enzyme binding // inferred from physical interaction /// 0019904 // protein domain specific binding // inferred from physical interaction /// 0030377 // urokinase plasminogen activat…	---	chr19:44152730-44174502 (-) // 45.24 // q13.31
11764166_s_at	1.64263e-06	9.00201e-09	1.63159	0.706275	1.63159	up	26298	EHF	ets homologous factor	0006351 // transcription, DNA-templated // inferred from electronic annotation /// 0006355 // regulation of transcription, DNA-templated // inferred from electronic annotation /// 0006366 // transcription from RNA polymerase II promoter // inferred from direct assay /// 0007275 // multicellular organismal development // traceable author statement /// 0008283 // cell proliferation // traceable aut…	0005634 // nucleus // inferred by curator /// 0005654 // nucleoplasm // inferred from direct assay /// 0005794 // Golgi apparatus // inferred from direct assay	0000978 // RNA polymerase II core promoter proximal region sequence-specific DNA binding // inferred from direct assay /// 0001077 // transcriptional activator activity, RNA polymerase II core promoter proximal region sequence-specific binding // inferred from direct assay /// 0003677 // DNA binding // inferred from direct assay /// 0003677 // DNA binding // traceable author statement /// 0003700…	---	chr11:34684330-34684825 (+) // 78.08 // p13
11720713_a_at	1.64263e-06	9.01212e-09	-1.57872	-0.658757	1.57872	down	10008	KCNE3	potassium channel, voltage gated subfamily E regulatory beta subunit 3	0006810 // transport // inferred from electronic annotation /// 0006811 // ion transport // inferred from electronic annotation /// 0006813 // potassium ion transport // inferred from electronic annotation /// 0034765 // regulation of ion transmembrane transport // inferred from electronic annotation /// 0043266 // regulation of potassium ion transport // inferred from electronic annotation /// 0…	0005737 // cytoplasm // inferred from direct assay /// 0005886 // plasma membrane // inferred from physical interaction /// 0008076 // voltage-gated potassium channel complex // not recorded /// 0008076 // voltage-gated potassium channel complex // inferred from direct assay /// 0016020 // membrane // inferred from electronic annotation /// 0016021 // integral component of membrane // inferred fr…	0005244 // voltage-gated ion channel activity // inferred from electronic annotation /// 0005249 // voltage-gated potassium channel activity // inferred from electronic annotation /// 0005267 // potassium channel activity // inferred from electronic annotation /// 0005515 // protein binding // inferred from physical interaction /// 0015459 // potassium channel regulator activity // not recorded /…	---	chr11:74165885-74178673 (-) // 65.9 // q13.4
11719249_at	1.66971e-06	9.19448e-09	1.50301	0.587857	1.50301	up	4084	MXD1	MAX dimerization protein 1	0000122 // negative regulation of transcription from RNA polymerase II promoter // inferred from direct assay /// 0006351 // transcription, DNA-templated // inferred from electronic annotation /// 0006355 // regulation of transcription, DNA-templated // inferred from electronic annotation /// 0007275 // multicellular organismal development // traceable author statement /// 0008283 // cell prolife…	0005634 // nucleus // inferred from electronic annotation	0000978 // RNA polymerase II core promoter proximal region sequence-specific DNA binding // inferred from direct assay /// 0001078 // transcriptional repressor activity, RNA polymerase II core promoter proximal region sequence-specific binding // inferred from direct assay /// 0003677 // DNA binding // inferred from electronic annotation /// 0003700 // transcription factor activity, sequence-spec…	---	chr2:70141984-70170077 (+) // 97.76 // p13.3
11725714_a_at	1.67256e-06	9.26809e-09	-1.66094	-0.731997	1.66094	down	6208	RPS14	ribosomal protein S14	0000028 // ribosomal small subunit assembly // inferred from mutant phenotype /// 0000028 // ribosomal small subunit assembly // inferred from sequence or structural similarity /// 0000122 // negative regulation of transcription from RNA polymerase II promoter // inferred from direct assay /// 0000184 // nuclear-transcribed mRNA catabolic process, nonsense-mediated decay // traceable author state…	0005730 // nucleolus // inferred from direct assay /// 0005737 // cytoplasm // inferred from direct assay /// 0005739 // mitochondrion // inferred from electronic annotation /// 0005829 // cytosol // traceable author statement /// 0005840 // ribosome // inferred from electronic annotation /// 0005925 // focal adhesion // inferred from direct assay /// 0016020 // membrane // inferred from direct a…	0003723 // RNA binding // inferred from sequence or structural similarity /// 0003735 // structural constituent of ribosome // not recorded /// 0005515 // protein binding // inferred from physical interaction /// 0044822 // poly(A) RNA binding // inferred from direct assay /// 0045182 // translation regulator activity // inferred from mutant phenotype /// 0048027 // mRNA 5'-UTR binding // inferre…	mRNA_processing_binding_Reactome // GenMAPP /// Ribosomal_Proteins // GenMAPP /// Ribosomal_Proteins // GenMAPP	chr5:149822384-149829319 (-) // 59.72 // q33.1
11723002_x_at	1.67256e-06	9.27789e-09	-1.32041	-0.40099	1.32041	down	5902	RANBP1	RAN binding protein 1	0007051 // spindle organization // inferred from electronic annotation /// 0007165 // signal transduction // traceable author statement /// 0010976 // positive regulation of neuron projection development // inferred from electronic annotation /// 0016032 // viral process // traceable author statement /// 0035690 // cellular response to drug // inferred from electronic annotation /// 0043547 // po…	0005622 // intracellular // inferred from electronic annotation /// 0005634 // nucleus // traceable author statement /// 0005635 // nuclear envelope // traceable author statement /// 0005737 // cytoplasm // inferred from direct assay /// 0005737 // cytoplasm // traceable author statement /// 0005813 // centrosome // inferred from electronic annotation /// 0032838 // cell projection cytoplasm // i…	0005092 // GDP-dissociation inhibitor activity // traceable author statement /// 0005096 // GTPase activator activity // inferred from electronic annotation /// 0005515 // protein binding // inferred from electronic annotation /// 0008536 // Ran GTPase binding // traceable author statement	---	chr22:20104971-20114877 (+) // 91.6 // q11.21
11733217_s_at	1.7095e-06	9.5174e-09	1.39749	0.482843	1.39749	up	54532	USP53	ubiquitin specific peptidase 53	0006511 // ubiquitin-dependent protein catabolic process // inferred from electronic annotation /// 0016579 // protein deubiquitination // inferred from electronic annotation	---	0005515 // protein binding // inferred from physical interaction /// 0036459 // ubiquitinyl hydrolase activity // inferred from electronic annotation	---	chr4:120133770-120216672 (+) // 96.63 // q26
11741750_a_at	1.70998e-06	9.55468e-09	-1.4213	-0.507208	1.4213	down	26268	FBXO9	F-box protein 9	0016567 // protein ubiquitination // inferred from direct assay /// 0016567 // protein ubiquitination // inferred from electronic annotation /// 0016567 // protein ubiquitination // non-traceable author statement /// 0031146 // SCF-dependent proteasomal ubiquitin-dependent protein catabolic process // inferred from direct assay /// 0032006 // regulation of TOR signaling // inferred from mutant ph…	0000151 // ubiquitin ligase complex // non-traceable author statement /// 0005737 // cytoplasm // inferred from direct assay /// 0019005 // SCF ubiquitin ligase complex // inferred from direct assay	0004842 // ubiquitin-protein transferase activity // non-traceable author statement /// 0005515 // protein binding // inferred from physical interaction	---	chr6:52929774-52965671 (+) // 80.57 // p12.1
11725934_x_at	1.71091e-06	9.59454e-09	1.35389	0.43711	1.35389	up	3309	HSPA5	heat shock protein family A (Hsp70) member 5	0002576 // platelet degranulation // traceable author statement /// 0006983 // ER overload response // inferred from electronic annotation /// 0006987 // activation of signaling protein activity involved in unfolded protein response // inferred from electronic annotation /// 0007596 // blood coagulation // traceable author statement /// 0021589 // cerebellum structural organization // inferred fr…	0005634 // nucleus // inferred from direct assay /// 0005634 // nucleus // inferred from mutant phenotype /// 0005737 // cytoplasm // inferred from electronic annotation /// 0005739 // mitochondrion // inferred from electronic annotation /// 0005783 // endoplasmic reticulum // inferred from direct assay /// 0005783 // endoplasmic reticulum // inferred from mutant phenotype /// 0005783 // endoplas…	0000166 // nucleotide binding // inferred from electronic annotation /// 0001948 // glycoprotein binding // inferred from physical interaction /// 0005509 // calcium ion binding // traceable author statement /// 0005515 // protein binding // inferred from physical interaction /// 0005524 // ATP binding // inferred from electronic annotation /// 0016887 // ATPase activity // inferred from direct a…	---	chr9:127997128-128003771 (-) // 89.6 // q33.3
11725307_s_at	1.71193e-06	9.63491e-09	1.28372	0.360335	1.28372	up	813	CALU	calumenin	0002576 // platelet degranulation // traceable author statement /// 0007596 // blood coagulation // traceable author statement /// 0014012 // peripheral nervous system axon regeneration // inferred from electronic annotation /// 0014070 // response to organic cyclic compound // inferred from electronic annotation /// 0030168 // platelet activation // traceable author statement /// 0043086 // nega…	0005576 // extracellular region // inferred from electronic annotation /// 0005783 // endoplasmic reticulum // inferred from direct assay /// 0005788 // endoplasmic reticulum lumen // inferred from electronic annotation /// 0005794 // Golgi apparatus // traceable author statement /// 0016020 // membrane // inferred from direct assay /// 0016529 // sarcoplasmic reticulum // inferred from electroni…	0004857 // enzyme inhibitor activity // inferred from electronic annotation /// 0005509 // calcium ion binding // inferred from direct assay /// 0005515 // protein binding // inferred from physical interaction /// 0019899 // enzyme binding // inferred from electronic annotation /// 0046872 // metal ion binding // inferred from electronic annotation	---	chr7:128379345-128412316 (+) // 97.59 // q32.1
11742936_a_at	1.71519e-06	9.68801e-09	-1.54038	-0.62329	1.54038	down	80746	TSEN2	tRNA splicing endonuclease subunit 2	0000379 // tRNA-type intron splice site recognition and cleavage // not recorded /// 0006388 // tRNA splicing, via endonucleolytic cleavage and ligation // inferred from direct assay /// 0006397 // mRNA processing // inferred from electronic annotation /// 0008033 // tRNA processing // traceable author statement /// 0010467 // gene expression // traceable author statement /// 0090305 // nucleic a…	0000214 // tRNA-intron endonuclease complex // not recorded /// 0005634 // nucleus // inferred from electronic annotation /// 0005654 // nucleoplasm // inferred from direct assay /// 0005654 // nucleoplasm // traceable author statement /// 0005730 // nucleolus // inferred from electronic annotation /// 0005737 // cytoplasm // inferred from direct assay /// 0005813 // centrosome // inferred from d…	0000213 // tRNA-intron endonuclease activity // not recorded /// 0003676 // nucleic acid binding // inferred from electronic annotation /// 0004518 // nuclease activity // inferred from electronic annotation /// 0004519 // endonuclease activity // inferred from electronic annotation /// 0005515 // protein binding // inferred from physical interaction /// 0016829 // lyase activity // inferred from…	---	chr3:12526009-12574816 (+) // 97.17 // p25.2
11724740_x_at	1.72748e-06	9.79237e-09	-1.25956	-0.33292	1.25956	down	3151	HMGN2	high mobility group nucleosomal binding domain 2	---	0000785 // chromatin // inferred from electronic annotation /// 0005634 // nucleus // inferred from electronic annotation /// 0005737 // cytoplasm // inferred from electronic annotation	0003677 // DNA binding // inferred from electronic annotation /// 0005515 // protein binding // inferred from physical interaction /// 0031492 // nucleosomal DNA binding // inferred from electronic annotation /// 0044822 // poly(A) RNA binding // inferred from direct assay	---	chr1:26798901-26803131 (+) // 90.09 // p36.11
11753650_x_at	1.77537e-06	1.01218e-08	-1.31652	-0.396728	1.31652	down	6428	SRSF3	serine/arginine-rich splicing factor 3	0000398 // mRNA splicing, via spliceosome // traceable author statement /// 0006366 // transcription from RNA polymerase II promoter // traceable author statement /// 0006369 // termination of RNA polymerase II transcription // traceable author statement /// 0006397 // mRNA processing // inferred from electronic annotation /// 0006406 // mRNA export from nucleus // traceable author statement /// …	0005634 // nucleus // inferred from electronic annotation /// 0005654 // nucleoplasm // traceable author statement /// 0005737 // cytoplasm // inferred from electronic annotation	0000166 // nucleotide binding // inferred from electronic annotation /// 0003676 // nucleic acid binding // inferred from electronic annotation /// 0003723 // RNA binding // traceable author statement /// 0005515 // protein binding // inferred from physical interaction /// 0044822 // poly(A) RNA binding // inferred from direct assay	---	chr11:18686596-18687130 (+) // 95.45 // p15.1 /// chr6:36564539-36569798 (+) // 99.05 // p21.31
11749691_a_at	1.77537e-06	1.01359e-08	-1.61129	-0.688213	1.61129	down	3070	HELLS	helicase, lymphoid-specific	0001655 // urogenital system development // inferred from electronic annotation /// 0006306 // DNA methylation // inferred from electronic annotation /// 0006342 // chromatin silencing // inferred from electronic annotation /// 0006346 // methylation-dependent chromatin silencing // inferred from sequence or structural similarity /// 0006351 // transcription, DNA-templated // inferred from electr…	0000775 // chromosome, centromeric region // inferred from sequence or structural similarity /// 0005634 // nucleus // inferred from electronic annotation /// 0005721 // pericentric heterochromatin // inferred from sequence or structural similarity	0000166 // nucleotide binding // inferred from electronic annotation /// 0003677 // DNA binding // inferred from electronic annotation /// 0003682 // chromatin binding // inferred from electronic annotation /// 0004386 // helicase activity // inferred from electronic annotation /// 0005515 // protein binding // inferred from physical interaction /// 0005524 // ATP binding // inferred from electro…	Apoptosis // GenMAPP	chr10:96305614-96361379 (+) // 98.41 // q23.33
11719487_a_at	1.77537e-06	1.01717e-08	1.43058	0.5166	1.43058	up	3914	LAMB3	laminin subunit beta 3	0007155 // cell adhesion // inferred from electronic annotation /// 0008544 // epidermis development // traceable author statement /// 0022617 // extracellular matrix disassembly // traceable author statement /// 0030198 // extracellular matrix organization // traceable author statement /// 0031581 // hemidesmosome assembly // traceable author statement /// 0034329 // cell junction assembly // tr…	0005576 // extracellular region // traceable author statement /// 0005578 // proteinaceous extracellular matrix // inferred from electronic annotation /// 0005604 // basement membrane // inferred from electronic annotation /// 0005610 // laminin-5 complex // inferred from electronic annotation	0005198 // structural molecule activity // non-traceable author statement /// 0005515 // protein binding // inferred from physical interaction /// 0032403 // protein complex binding // inferred from electronic annotation	---	chr1:209788214-209824679 (-) // 95.46 // q32.2
11717168_a_at	1.81739e-06	1.04582e-08	1.78126	0.8329	1.78126	up	5187	PER1	period circadian clock 1	0000122 // negative regulation of transcription from RNA polymerase II promoter // inferred from sequence or structural similarity /// 0002028 // regulation of sodium ion transport // inferred from sequence or structural similarity /// 0006351 // transcription, DNA-templated // inferred from electronic annotation /// 0006355 // regulation of transcription, DNA-templated // inferred from electroni…	0005634 // nucleus // inferred from electronic annotation /// 0005737 // cytoplasm // inferred from direct assay	0000976 // transcription regulatory region sequence-specific DNA binding // inferred from electronic annotation /// 0000978 // RNA polymerase II core promoter proximal region sequence-specific DNA binding // inferred from direct assay /// 0000989 // transcription factor activity, transcription factor binding // inferred from sequence or structural similarity /// 0004871 // signal transducer activ…	Circadian_Exercise // GenMAPP	chr17:8043787-8054167 (-) // 90.53 // p13.1
11742409_x_at	1.81739e-06	1.0486e-08	1.59512	0.673662	1.59512	up	11202	KLK8	kallikrein related peptidase 8	0006508 // proteolysis // not recorded /// 0007613 // memory // not recorded /// 0007613 // memory // inferred from sequence or structural similarity /// 0008219 // cell death // inferred from sequence or structural similarity /// 0009611 // response to wounding // inferred from sequence or structural similarity /// 0031642 // negative regulation of myelination // inferred from sequence or struct…	0005576 // extracellular region // inferred from electronic annotation /// 0005615 // extracellular space // not recorded /// 0005615 // extracellular space // inferred from sequence or structural similarity /// 0005737 // cytoplasm // inferred from direct assay /// 0030141 // secretory granule // not recorded	0004252 // serine-type endopeptidase activity // inferred from direct assay /// 0005515 // protein binding // inferred from physical interaction /// 0008233 // peptidase activity // inferred from electronic annotation /// 0008236 // serine-type peptidase activity // inferred from electronic annotation /// 0016787 // hydrolase activity // inferred from electronic annotation	---	chr19:51499263-51504958 (-) // 92.58 // q13.41
11757384_x_at	1.83762e-06	1.06399e-08	-1.35085	-0.433862	1.35085	down	7389	UROD	uroporphyrinogen decarboxylase	0001889 // liver development // inferred from electronic annotation /// 0006778 // porphyrin-containing compound metabolic process // traceable author statement /// 0006779 // porphyrin-containing compound biosynthetic process // inferred from electronic annotation /// 0006782 // protoporphyrinogen IX biosynthetic process // inferred from electronic annotation /// 0006783 // heme biosynthetic pro…	0005654 // nucleoplasm // inferred from direct assay /// 0005737 // cytoplasm // inferred from direct assay /// 0005829 // cytosol // not recorded /// 0005829 // cytosol // traceable author statement	0004853 // uroporphyrinogen decarboxylase activity // inferred from direct assay /// 0004853 // uroporphyrinogen decarboxylase activity // traceable author statement /// 0005515 // protein binding // inferred from physical interaction /// 0008198 // ferrous iron binding // inferred from electronic annotation /// 0016829 // lyase activity // inferred from electronic annotation /// 0016831 // carbo…	HEME-BIOSYNTHESIS-II // HumanCyc /// Heme_Biosynthesis // GenMAPP	chr1:45480420-45481245 (+) // 87.5 // p34.1
11741952_x_at	1.87197e-06	1.08767e-08	1.95014	0.963575	1.95014	up	54852	PAQR5	progestin and adipoQ receptor family member V	0007275 // multicellular organismal development // inferred from electronic annotation /// 0030154 // cell differentiation // inferred from electronic annotation /// 0048477 // oogenesis // inferred from electronic annotation	0016020 // membrane // inferred from electronic annotation /// 0016021 // integral component of membrane // inferred from electronic annotation	0004872 // receptor activity // not recorded /// 0005496 // steroid binding // inferred from electronic annotation /// 0005515 // protein binding // inferred from physical interaction /// 0008289 // lipid binding // inferred from electronic annotation	---	chr15:69591285-69699976 (+) // 80.06 // q23
11753383_s_at	1.88057e-06	1.09647e-08	-1.49875	-0.583762	1.49875	down	27233	SULT1C4	sulfotransferase family 1C member 4	0006805 // xenobiotic metabolic process // traceable author statement /// 0008152 // metabolic process // inferred from electronic annotation /// 0044281 // small molecule metabolic process // traceable author statement /// 0050427 // 3'-phosphoadenosine 5'-phosphosulfate metabolic process // traceable author statement /// 0051923 // sulfation // inferred from direct assay	0005737 // cytoplasm // inferred from electronic annotation /// 0005829 // cytosol // traceable author statement	0008146 // sulfotransferase activity // inferred from direct assay /// 0008146 // sulfotransferase activity // non-traceable author statement /// 0016740 // transferase activity // inferred from electronic annotation	---	chr2:108994425-109004135 (+) // 99.89 // q12.3
11721125_at	1.92481e-06	1.12617e-08	-1.37475	-0.459168	1.37475	down	84888	SPPL2A	signal peptide peptidase like 2A	0006508 // proteolysis // inferred from electronic annotation /// 0006509 // membrane protein ectodomain proteolysis // inferred from direct assay /// 0031293 // membrane protein intracellular domain proteolysis // inferred from direct assay /// 0031293 // membrane protein intracellular domain proteolysis // inferred from mutant phenotype /// 0033619 // membrane protein proteolysis // inferred fr…	0005764 // lysosome // inferred from electronic annotation /// 0005765 // lysosomal membrane // inferred from direct assay /// 0005768 // endosome // inferred from electronic annotation /// 0005770 // late endosome // inferred from direct assay /// 0005886 // plasma membrane // inferred from direct assay /// 0016020 // membrane // inferred from direct assay /// 0016021 // integral component of me…	0004190 // aspartic-type endopeptidase activity // inferred from electronic annotation /// 0005515 // protein binding // inferred from physical interaction /// 0008233 // peptidase activity // inferred from electronic annotation /// 0016787 // hydrolase activity // inferred from electronic annotation /// 0042500 // aspartic endopeptidase activity, intramembrane cleaving // inferred from direct as…	---	chr15:50999505-51058005 (-) // 91.86 // q21.2
11743617_at	2.00664e-06	1.17811e-08	1.29572	0.373758	1.29572	up	3673	ITGA2	integrin, alpha 2 (CD49B, alpha 2 subunit of VLA-2 receptor)	0006929 // substrate-dependent cell migration // inferred from mutant phenotype /// 0007155 // cell adhesion // traceable author statement /// 0007160 // cell-matrix adhesion // inferred from mutant phenotype /// 0007229 // integrin-mediated signaling pathway // inferred from mutant phenotype /// 0007411 // axon guidance // traceable author statement /// 0007596 // blood coagulation // traceable …	0005886 // plasma membrane // inferred from direct assay /// 0005886 // plasma membrane // traceable author statement /// 0005925 // focal adhesion // inferred from direct assay /// 0008305 // integrin complex // traceable author statement /// 0009897 // external side of plasma membrane // inferred from electronic annotation /// 0009986 // cell surface // inferred from direct assay /// 0016020 //…	0001618 // virus receptor activity // inferred from electronic annotation /// 0005515 // protein binding // inferred from physical interaction /// 0005518 // collagen binding // inferred from mutant phenotype /// 0038064 // collagen receptor activity // inferred from mutant phenotype /// 0046872 // metal ion binding // inferred from electronic annotation /// 0098639 // collagen binding involved i…	Integrin-mediated_cell_adhesion_KEGG // GenMAPP	chr5:52285155-52390608 (+) // 88.18 // q11.2
11719114_a_at	2.03785e-06	1.20056e-08	1.33906	0.421217	1.33906	up	9867	PJA2	praja ring finger 2, E3 ubiquitin protein ligase	0007616 // long-term memory // inferred from sequence or structural similarity /// 0010738 // regulation of protein kinase A signaling // inferred from mutant phenotype /// 0016567 // protein ubiquitination // inferred from direct assay /// 0016567 // protein ubiquitination // inferred from electronic annotation /// 0035329 // hippo signaling // inferred from electronic annotation	0000139 // Golgi membrane // inferred from electronic annotation /// 0005737 // cytoplasm // inferred from direct assay /// 0005783 // endoplasmic reticulum // inferred from electronic annotation /// 0005789 // endoplasmic reticulum membrane // inferred from electronic annotation /// 0005794 // Golgi apparatus // inferred from electronic annotation /// 0005886 // plasma membrane // inferred from …	0004842 // ubiquitin-protein transferase activity // inferred from direct assay /// 0005515 // protein binding // inferred from electronic annotation /// 0008270 // zinc ion binding // inferred from electronic annotation /// 0016874 // ligase activity // inferred from electronic annotation /// 0034236 // protein kinase A catalytic subunit binding // inferred from mutant phenotype /// 0034237 // p…	---	chr5:108670418-108745695 (-) // 94.68 // q21.3
11716082_s_at	2.04474e-06	1.20876e-08	-1.43718	-0.523238	1.43718	down	79084	WDR77	WD repeat domain 77	0000387 // spliceosomal snRNP assembly // traceable author statement /// 0006325 // chromatin organization // traceable author statement /// 0006357 // regulation of transcription from RNA polymerase II promoter // inferred from electronic annotation /// 0008284 // positive regulation of cell proliferation // inferred from electronic annotation /// 0008285 // negative regulation of cell prolifera…	0005634 // nucleus // inferred from genetic interaction /// 0005654 // nucleoplasm // inferred from direct assay /// 0005654 // nucleoplasm // traceable author statement /// 0005737 // cytoplasm // inferred from direct assay /// 0005737 // cytoplasm // inferred from genetic interaction /// 0005794 // Golgi apparatus // inferred from direct assay /// 0005829 // cytosol // inferred from direct assa…	0005515 // protein binding // inferred from physical interaction /// 0030374 // ligand-dependent nuclear receptor transcription coactivator activity // inferred from genetic interaction	---	chr1:111982512-111991998 (-) // 90.59 // p13.2
11750105_x_at	2.06337e-06	1.22743e-08	-1.29506	-0.373015	1.29506	down	3182	HNRNPAB	heterogeneous nuclear ribonucleoprotein A/B	0000122 // negative regulation of transcription from RNA polymerase II promoter // inferred from electronic annotation /// 0001837 // epithelial to mesenchymal transition // inferred from sequence or structural similarity /// 0045893 // positive regulation of transcription, DNA-templated // inferred from sequence or structural similarity	0005634 // nucleus // inferred from sequence or structural similarity /// 0005654 // nucleoplasm // inferred from direct assay /// 0005737 // cytoplasm // inferred from sequence or structural similarity /// 0019013 // viral nucleocapsid // inferred from electronic annotation /// 0030529 // ribonucleoprotein complex // inferred from direct assay /// 0090575 // RNA polymerase II transcription facto…	0000166 // nucleotide binding // inferred from electronic annotation /// 0003676 // nucleic acid binding // inferred from electronic annotation /// 0003700 // transcription factor activity, sequence-specific DNA binding // inferred from sequence or structural similarity /// 0003723 // RNA binding // traceable author statement /// 0003729 // mRNA binding // traceable author statement /// 0005515 /…	mRNA_processing_Reactome // GenMAPP	chr5:177631823-177638181 (+) // 90.47 // q35.3
11757879_s_at	2.06337e-06	1.22812e-08	-1.44194	-0.528015	1.44194	down	28988	DBNL	drebrin-like	0002250 // adaptive immune response // inferred from electronic annotation /// 0002376 // immune system process // inferred from electronic annotation /// 0006810 // transport // inferred from electronic annotation /// 0006897 // endocytosis // inferred from electronic annotation /// 0006898 // receptor-mediated endocytosis // inferred from electronic annotation /// 0006915 // apoptotic process /…	0000139 // Golgi membrane // inferred from electronic annotation /// 0001726 // ruffle // inferred from sequence or structural similarity /// 0002102 // podosome // inferred from sequence or structural similarity /// 0005622 // intracellular // inferred from electronic annotation /// 0005737 // cytoplasm // inferred from sequence or structural similarity /// 0005794 // Golgi apparatus // inferred…	0003779 // actin binding // inferred from sequence or structural similarity /// 0005515 // protein binding // inferred from physical interaction /// 0008022 // protein C-terminus binding // inferred from electronic annotation /// 0008047 // enzyme activator activity // traceable author statement /// 0019904 // protein domain specific binding // inferred from electronic annotation /// 0051015 // a…	---	chr7:44100811-44101763 (+) // 83.09 // p13
11744435_a_at	2.06926e-06	1.23582e-08	1.37766	0.462215	1.37766	up	1848	DUSP6	dual specificity phosphatase 6	0000165 // MAPK cascade // traceable author statement /// 0000186 // activation of MAPKK activity // traceable author statement /// 0000187 // activation of MAPK activity // traceable author statement /// 0000188 // inactivation of MAPK activity // inferred from direct assay /// 0001933 // negative regulation of protein phosphorylation // inferred from electronic annotation /// 0002224 // toll-li…	0005654 // nucleoplasm // traceable author statement /// 0005737 // cytoplasm // inferred from direct assay /// 0005829 // cytosol // traceable author statement	0004721 // phosphoprotein phosphatase activity // inferred from electronic annotation /// 0004725 // protein tyrosine phosphatase activity // inferred from electronic annotation /// 0005515 // protein binding // inferred from electronic annotation /// 0008138 // protein tyrosine/serine/threonine phosphatase activity // inferred from electronic annotation /// 0016787 // hydrolase activity // infer…	---	chr12:89742102-89746274 (-) // 98.71 // q21.33
11726704_x_at	2.07521e-06	1.24357e-08	1.39849	0.483875	1.39849	up	8915	BCL10	B-cell CLL/lymphoma 10	0001783 // B cell apoptotic process // inferred from electronic annotation /// 0001843 // neural tube closure // inferred from sequence or structural similarity /// 0002223 // stimulatory C-type lectin receptor signaling pathway // traceable author statement /// 0002224 // toll-like receptor signaling pathway // inferred by curator /// 0002237 // response to molecule of bacterial origin // inferr…	0001772 // immunological synapse // inferred from electronic annotation /// 0005634 // nucleus // inferred from direct assay /// 0005737 // cytoplasm // inferred from direct assay /// 0005764 // lysosome // inferred from direct assay /// 0005829 // cytosol // inferred from direct assay /// 0005829 // cytosol // traceable author statement /// 0005881 // cytoplasmic microtubule // inferred from dir…	0002020 // protease binding // inferred from physical interaction /// 0003713 // transcription coactivator activity // inferred from direct assay /// 0005515 // protein binding // inferred from physical interaction /// 0008022 // protein C-terminus binding // inferred from physical interaction /// 0008134 // transcription factor binding // inferred from physical interaction /// 0019209 // kinase …	---	chr1:85731461-85743583 (-) // 89.78 // p22.3
11724871_a_at	2.09086e-06	1.25718e-08	-1.56492	-0.646088	1.56492	down	9075	CLDN2	claudin 2	0016338 // calcium-independent cell-cell adhesion via plasma membrane cell-adhesion molecules // inferred from sequence or structural similarity	0005886 // plasma membrane // inferred from electronic annotation /// 0005923 // bicellular tight junction // inferred from sequence or structural similarity /// 0016020 // membrane // inferred from electronic annotation /// 0016021 // integral component of membrane // inferred from electronic annotation /// 0030054 // cell junction // inferred from electronic annotation /// 0070062 // extracellu…	0005198 // structural molecule activity // inferred from electronic annotation /// 0005515 // protein binding // inferred from physical interaction /// 0042802 // identical protein binding // inferred from sequence or structural similarity	---	chrX:106163633-106174091 (+) // 84.73 // q22.3
11747524_a_at	2.09432e-06	1.2635e-08	-1.28088	-0.357138	1.28088	down	2581	GALC	galactosylceramidase	0005975 // carbohydrate metabolic process // inferred from electronic annotation /// 0006629 // lipid metabolic process // inferred from electronic annotation /// 0006665 // sphingolipid metabolic process // traceable author statement /// 0006683 // galactosylceramide catabolic process // inferred from sequence or structural similarity /// 0006687 // glycosphingolipid metabolic process // traceab…	0005739 // mitochondrion // inferred from electronic annotation /// 0005764 // lysosome // traceable author statement /// 0043202 // lysosomal lumen // traceable author statement /// 0070062 // extracellular exosome // inferred from direct assay	0004336 // galactosylceramidase activity // inferred from sequence or structural similarity /// 0016787 // hydrolase activity // inferred from electronic annotation /// 0016798 // hydrolase activity, acting on glycosyl bonds // inferred from electronic annotation	---	chr14:88400809-88459522 (-) // 99.34 // q31.3
11736670_a_at	2.10614e-06	1.2749e-08	-1.44293	-0.529005	1.44293	down	4173	MCM4	minichromosome maintenance complex component 4	0000082 // G1/S transition of mitotic cell cycle // traceable author statement /// 0000278 // mitotic cell cycle // traceable author statement /// 0006260 // DNA replication // non-traceable author statement /// 0006260 // DNA replication // traceable author statement /// 0006268 // DNA unwinding involved in DNA replication // inferred from electronic annotation /// 0006270 // DNA replication ini…	0000784 // nuclear chromosome, telomeric region // inferred from direct assay /// 0005634 // nucleus // non-traceable author statement /// 0005654 // nucleoplasm // inferred from direct assay /// 0005654 // nucleoplasm // traceable author statement /// 0016020 // membrane // inferred from direct assay /// 0042555 // MCM complex // inferred from direct assay	0000166 // nucleotide binding // inferred from electronic annotation /// 0003677 // DNA binding // inferred from electronic annotation /// 0003678 // DNA helicase activity // inferred from electronic annotation /// 0003697 // single-stranded DNA binding // inferred from electronic annotation /// 0004003 // ATP-dependent DNA helicase activity // inferred from direct assay /// 0004386 // helicase a…	Cell_cycle_KEGG // GenMAPP /// DNA_replication_Reactome // GenMAPP /// G1_to_S_cell_cycle_Reactome // GenMAPP	chr8:48873493-48890068 (+) // 90.64 // q11.21
11750043_a_at	2.11163e-06	1.28654e-08	-1.49937	-0.584353	1.49937	down	92170	MTG1	mitochondrial ribosome-associated GTPase 1	0006417 // regulation of translation // inferred from electronic annotation /// 0006595 // polyamine metabolic process // traceable author statement /// 0006596 // polyamine biosynthetic process // traceable author statement /// 0006598 // polyamine catabolic process // inferred from direct assay /// 0006598 // polyamine catabolic process // inferred from electronic annotation /// 0006805 // xeno…	0005737 // cytoplasm // inferred from electronic annotation /// 0005739 // mitochondrion // not recorded /// 0005743 // mitochondrial inner membrane // inferred from direct assay /// 0005759 // mitochondrial matrix // inferred from direct assay /// 0005761 // mitochondrial ribosome // inferred from direct assay /// 0005777 // peroxisome // inferred from electronic annotation /// 0005782 // peroxi…	0000166 // nucleotide binding // inferred from electronic annotation /// 0003924 // GTPase activity // not recorded /// 0003924 // GTPase activity // inferred from direct assay /// 0005102 // receptor binding // inferred from physical interaction /// 0005515 // protein binding // inferred from physical interaction /// 0005525 // GTP binding // inferred from electronic annotation /// 0016491 // ox…	---	chr10:135207677-135233723 (+) // 99.9 // q26.3
11717425_a_at	2.11163e-06	1.2879e-08	-1.54311	-0.625845	1.54311	down	51652 /// 100526767	CHMP3 /// RNF103-CHMP3	charged multivesicular body protein 3 /// RNF103-CHMP3 readthrough	0000920 // cell separation after cytokinesis // inferred from mutant phenotype /// 0006810 // transport // inferred from electronic annotation /// 0006915 // apoptotic process // inferred from electronic annotation /// 0006997 // nucleus organization // inferred from mutant phenotype /// 0007034 // vacuolar transport // inferred from electronic annotation /// 0007049 // cell cycle // inferred fro…	0000815 // ESCRT III complex // inferred from direct assay /// 0005737 // cytoplasm // inferred from electronic annotation /// 0005768 // endosome // inferred from electronic annotation /// 0005829 // cytosol // traceable author statement /// 0005886 // plasma membrane // inferred from direct assay /// 0016020 // membrane // inferred from electronic annotation /// 0016023 // cytoplasmic membrane-…	0005515 // protein binding // inferred from physical interaction /// 0031210 // phosphatidylcholine binding // inferred from mutant phenotype /// 0042803 // protein homodimerization activity // inferred from mutant phenotype /// 1990381 // ubiquitin-specific protease binding // inferred from physical interaction	---	chr2:86731061-86790620 (-) // 61.91 // p11.2
11719718_a_at	2.11163e-06	1.29104e-08	-1.58603	-0.665417	1.58603	down	6850	SYK	spleen tyrosine kinase	0000187 // activation of MAPK activity // inferred from electronic annotation /// 0001525 // angiogenesis // inferred from electronic annotation /// 0001820 // serotonin secretion // inferred from electronic annotation /// 0001945 // lymph vessel development // inferred from sequence or structural similarity /// 0002092 // positive regulation of receptor internalization // inferred from electroni…	0005634 // nucleus // inferred from direct assay /// 0005737 // cytoplasm // inferred from direct assay /// 0005829 // cytosol // inferred by curator /// 0005829 // cytosol // traceable author statement /// 0005886 // plasma membrane // traceable author statement /// 0016020 // membrane // inferred from electronic annotation /// 0019815 // B cell receptor complex // inferred from electronic annot…	0000166 // nucleotide binding // inferred from electronic annotation /// 0004672 // protein kinase activity // inferred from direct assay /// 0004672 // protein kinase activity // non-traceable author statement /// 0004674 // protein serine/threonine kinase activity // inferred from direct assay /// 0004713 // protein tyrosine kinase activity // not recorded /// 0004713 // protein tyrosine kinase…	---	chr9:93563911-93660831 (+) // 92.48 // q22.2
11739687_a_at	2.14739e-06	1.31726e-08	1.30053	0.379098	1.30053	up	83641	FAM107B	family with sequence similarity 107 member B	0007605 // sensory perception of sound // inferred from electronic annotation	---	---	---	chr10:14560558-14816896 (-) // 98.47 // p13
11758480_s_at	2.17921e-06	1.34222e-08	-1.39364	-0.478858	1.39364	down	64146 /// 84342	PDF /// COG8	peptide deformylase (mitochondrial) /// component of oligomeric golgi complex 8	0006412 // translation // inferred from electronic annotation /// 0006810 // transport // inferred from electronic annotation /// 0006891 // intra-Golgi vesicle-mediated transport // not recorded /// 0008152 // metabolic process // inferred from electronic annotation /// 0008284 // positive regulation of cell proliferation // inferred from mutant phenotype /// 0015031 // protein transport // infe…	0000139 // Golgi membrane // inferred from electronic annotation /// 0005739 // mitochondrion // inferred from direct assay /// 0005794 // Golgi apparatus // inferred from electronic annotation /// 0016020 // membrane // inferred from direct assay /// 0017119 // Golgi transport complex // inferred from direct assay /// 0017119 // Golgi transport complex // non-traceable author statement	0005506 // iron ion binding // inferred from electronic annotation /// 0005515 // protein binding // inferred from physical interaction /// 0016787 // hydrolase activity // inferred from electronic annotation /// 0042586 // peptide deformylase activity // inferred from direct assay /// 0046872 // metal ion binding // inferred from electronic annotation	---	chr16:69362523-69362986 (-) // 99.14 // q22.1
11748543_a_at	2.17921e-06	1.3456e-08	1.61792	0.694137	1.61792	up	10628	TXNIP	thioredoxin interacting protein	0000122 // negative regulation of transcription from RNA polymerase II promoter // inferred from electronic annotation /// 0006351 // transcription, DNA-templated // inferred from electronic annotation /// 0006355 // regulation of transcription, DNA-templated // inferred from electronic annotation /// 0006606 // protein import into nucleus // inferred from electronic annotation /// 0006979 // res…	0005634 // nucleus // inferred from electronic annotation /// 0005737 // cytoplasm // inferred from direct assay /// 0005758 // mitochondrial intermembrane space // inferred from electronic annotation /// 0005829 // cytosol // traceable author statement	0004857 // enzyme inhibitor activity // inferred from electronic annotation /// 0005515 // protein binding // inferred from physical interaction /// 0031625 // ubiquitin protein ligase binding // inferred from physical interaction	---	chr1:145439346-145441230 (+) // 100.0 // q21.1
11748793_a_at	2.18195e-06	1.35268e-08	1.39975	0.485173	1.39975	up	440	ASNS	asparagine synthetase (glutamine-hydrolyzing)	0001889 // liver development // inferred from electronic annotation /// 0006520 // cellular amino acid metabolic process // inferred from electronic annotation /// 0006529 // asparagine biosynthetic process // inferred by curator /// 0006529 // asparagine biosynthetic process // inferred from direct assay /// 0006541 // glutamine metabolic process // not recorded /// 0008152 // metabolic process …	0005829 // cytosol // not recorded /// 0005829 // cytosol // traceable author statement	0000166 // nucleotide binding // inferred from electronic annotation /// 0004066 // asparagine synthase (glutamine-hydrolyzing) activity // not recorded /// 0004066 // asparagine synthase (glutamine-hydrolyzing) activity // inferred from direct assay /// 0005515 // protein binding // inferred from physical interaction /// 0005524 // ATP binding // inferred from electronic annotation /// 0016874 /…	ASPARAGINE-BIOSYNTHESIS // HumanCyc	chr7:97481515-97501764 (-) // 99.51 // q21.3
11722971_a_at	2.18195e-06	1.35612e-08	1.7021	0.767318	1.7021	up	9586	CREB5	cAMP responsive element binding protein 5	0006351 // transcription, DNA-templated // inferred from electronic annotation /// 0006355 // regulation of transcription, DNA-templated // inferred from electronic annotation /// 0006366 // transcription from RNA polymerase II promoter // traceable author statement /// 0045444 // fat cell differentiation // inferred from electronic annotation /// 0045893 // positive regulation of transcription, …	0005634 // nucleus // inferred by curator /// 0070062 // extracellular exosome // inferred from direct assay	0001077 // transcriptional activator activity, RNA polymerase II core promoter proximal region sequence-specific binding // inferred from electronic annotation /// 0003676 // nucleic acid binding // inferred from electronic annotation /// 0003677 // DNA binding // inferred from electronic annotation /// 0003700 // transcription factor activity, sequence-specific DNA binding // inferred from direc…	---	chr7:28452038-28865508 (+) // 92.07 // p15.1
11722029_a_at	2.20916e-06	1.37751e-08	-1.41983	-0.505717	1.41983	down	9690	UBE3C	ubiquitin protein ligase E3C	0000209 // protein polyubiquitination // inferred from direct assay /// 0008152 // metabolic process // inferred from electronic annotation /// 0016567 // protein ubiquitination // inferred from electronic annotation /// 0042787 // protein ubiquitination involved in ubiquitin-dependent protein catabolic process // not recorded	0000502 // proteasome complex // inferred from electronic annotation /// 0005622 // intracellular // inferred by curator /// 0005634 // nucleus // inferred from electronic annotation /// 0005737 // cytoplasm // not recorded	0004842 // ubiquitin-protein transferase activity // inferred from direct assay /// 0005515 // protein binding // inferred from physical interaction /// 0016874 // ligase activity // inferred from electronic annotation /// 0061630 // ubiquitin protein ligase activity // not recorded	---	chr7:156931631-157062066 (+) // 96.26 // q36.3
11717461_a_at	2.21988e-06	1.38869e-08	-1.37698	-0.46151	1.37698	down	54888	NSUN2	NOP2/Sun RNA methyltransferase family member 2	0006400 // tRNA modification // traceable author statement /// 0007049 // cell cycle // inferred from electronic annotation /// 0007067 // mitotic nuclear division // inferred from electronic annotation /// 0007286 // spermatid development // inferred from electronic annotation /// 0008033 // tRNA processing // traceable author statement /// 0010467 // gene expression // traceable author statemen…	0005634 // nucleus // inferred from direct assay /// 0005654 // nucleoplasm // traceable author statement /// 0005730 // nucleolus // inferred from direct assay /// 0005737 // cytoplasm // inferred from direct assay /// 0005819 // spindle // inferred from electronic annotation /// 0005856 // cytoskeleton // inferred from electronic annotation /// 0033391 // chromatoid body // inferred from electr…	0000049 // tRNA binding // not recorded /// 0003723 // RNA binding // inferred from electronic annotation /// 0008168 // methyltransferase activity // inferred from electronic annotation /// 0016428 // tRNA (cytosine-5-)-methyltransferase activity // inferred from direct assay /// 0016740 // transferase activity // inferred from electronic annotation /// 0044822 // poly(A) RNA binding // inferred…	---	chr5:6599351-6633473 (-) // 57.24 // p15.31
11739079_a_at	2.25338e-06	1.41421e-08	-1.5434	-0.626112	1.5434	down	8125	ANP32A	acidic nuclear phosphoprotein 32 family member A	0006351 // transcription, DNA-templated // inferred from electronic annotation /// 0006355 // regulation of transcription, DNA-templated // inferred from electronic annotation /// 0006913 // nucleocytoplasmic transport // inferred from direct assay /// 0006913 // nucleocytoplasmic transport // non-traceable author statement /// 0010467 // gene expression // traceable author statement /// 0035556 …	0005634 // nucleus // inferred from direct assay /// 0005654 // nucleoplasm // traceable author statement /// 0005737 // cytoplasm // inferred from direct assay /// 0005783 // endoplasmic reticulum // inferred from direct assay /// 0048471 // perinuclear region of cytoplasm // inferred from direct assay	0005515 // protein binding // inferred from physical interaction /// 0044822 // poly(A) RNA binding // inferred from direct assay	---	chr15:69070873-69113263 (-) // 96.48 // q23
11759749_at	2.25498e-06	1.41978e-08	1.85856	0.894185	1.85856	up	51274	KLF3	Kruppel-like factor 3 (basic)	0006351 // transcription, DNA-templated // inferred from electronic annotation /// 0006355 // regulation of transcription, DNA-templated // inferred from electronic annotation /// 0007275 // multicellular organismal development // traceable author statement /// 1901653 // cellular response to peptide // inferred from electronic annotation	0005634 // nucleus // inferred from electronic annotation	0003676 // nucleic acid binding // inferred from electronic annotation /// 0003677 // DNA binding // inferred from electronic annotation /// 0003700 // transcription factor activity, sequence-specific DNA binding // non-traceable author statement /// 0005515 // protein binding // inferred from physical interaction /// 0046872 // metal ion binding // inferred from electronic annotation	---	chr4:38665820-38692814 (+) // 94.78 // p14
11720275_a_at	2.27672e-06	1.43808e-08	1.40075	0.486195	1.40075	up	8837	CFLAR	CASP8 and FADD like apoptosis regulator	0006508 // proteolysis // inferred from electronic annotation /// 0006915 // apoptotic process // inferred from mutant phenotype /// 0006915 // apoptotic process // traceable author statement /// 0006919 // activation of cysteine-type endopeptidase activity involved in apoptotic process // not recorded /// 0007519 // skeletal muscle tissue development // inferred from sequence or structural simil…	0005737 // cytoplasm // inferred from direct assay /// 0005829 // cytosol // traceable author statement /// 0031264 // death-inducing signaling complex // inferred from direct assay /// 0031265 // CD95 death-inducing signaling complex // inferred from electronic annotation /// 0045121 // membrane raft // inferred from electronic annotation /// 0097342 // ripoptosome // inferred from direct assay	0002020 // protease binding // inferred from physical interaction /// 0004197 // cysteine-type endopeptidase activity // inferred from electronic annotation /// 0005123 // death receptor binding // inferred from electronic annotation /// 0005515 // protein binding // inferred from physical interaction /// 0008047 // enzyme activator activity // inferred from direct assay /// 0008234 // cysteine-t…	---	chr2:201980681-202005162 (+) // 72.72 // q33.1
11718890_x_at	2.27835e-06	1.44371e-08	1.35377	0.43698	1.35377	up	2309	FOXO3	forkhead box O3	0000122 // negative regulation of transcription from RNA polymerase II promoter // inferred from direct assay /// 0000122 // negative regulation of transcription from RNA polymerase II promoter // inferred from mutant phenotype /// 0001542 // ovulation from ovarian follicle // inferred from electronic annotation /// 0001544 // initiation of primordial ovarian follicle growth // inferred from elec…	0005634 // nucleus // inferred from direct assay /// 0005654 // nucleoplasm // inferred from direct assay /// 0005654 // nucleoplasm // traceable author statement /// 0005737 // cytoplasm // inferred from direct assay /// 0005829 // cytosol // traceable author statement /// 0016020 // membrane // inferred from electronic annotation	0000981 // RNA polymerase II transcription factor activity, sequence-specific DNA binding // not recorded /// 0001047 // core promoter binding // inferred from sequence or structural similarity /// 0001221 // transcription cofactor binding // inferred from electronic annotation /// 0001227 // transcriptional repressor activity, RNA polymerase II transcription regulatory region sequence-specific b…	---	chr6:108881487-109006388 (+) // 94.74 // q21
11725102_at	2.32415e-06	1.47745e-08	1.5675	0.648465	1.5675	up	1956	EGFR	epidermal growth factor receptor	0000165 // MAPK cascade // traceable author statement /// 0000186 // activation of MAPKK activity // traceable author statement /// 0000902 // cell morphogenesis // inferred from electronic annotation /// 0001503 // ossification // non-traceable author statement /// 0001889 // liver development // inferred from electronic annotation /// 0001892 // embryonic placenta development // inferred from e…	0000139 // Golgi membrane // inferred from electronic annotation /// 0005576 // extracellular region // inferred from electronic annotation /// 0005615 // extracellular space // non-traceable author statement /// 0005622 // intracellular // inferred from electronic annotation /// 0005634 // nucleus // inferred from direct assay /// 0005737 // cytoplasm // inferred from direct assay /// 0005768 //…	0000166 // nucleotide binding // inferred from electronic annotation /// 0001948 // glycoprotein binding // inferred from electronic annotation /// 0003682 // chromatin binding // inferred from direct assay /// 0003690 // double-stranded DNA binding // non-traceable author statement /// 0004672 // protein kinase activity // inferred from electronic annotation /// 0004709 // MAP kinase kinase kina…	---	chr7:55086713-55275325 (+) // 94.55 // p11.2
11753560_s_at	2.40036e-06	1.53075e-08	-1.21852	-0.285132	1.21852	down	5901	RAN	RAN, member RAS oncogene family	0000055 // ribosomal large subunit export from nucleus // inferred from mutant phenotype /// 0000056 // ribosomal small subunit export from nucleus // inferred from mutant phenotype /// 0000060 // protein import into nucleus, translocation // inferred from mutant phenotype /// 0006259 // DNA metabolic process // traceable author statement /// 0006606 // protein import into nucleus // not recorded…	0000785 // chromatin // inferred from direct assay /// 0001673 // male germ cell nucleus // inferred from electronic annotation /// 0002177 // manchette // inferred from electronic annotation /// 0005622 // intracellular // --- /// 0005622 // intracellular // inferred from electronic annotation /// 0005634 // nucleus // inferred from direct assay /// 0005635 // nuclear envelope // inferred from e…	0000166 // nucleotide binding // inferred from electronic annotation /// 0003682 // chromatin binding // traceable author statement /// 0003713 // transcription coactivator activity // non-traceable author statement /// 0003924 // GTPase activity // traceable author statement /// 0005515 // protein binding // inferred from physical interaction /// 0005525 // GTP binding // inferred from direct as…	---	chr12:131357138-131360469 (+) // 99.69 // q24.33 /// chr6:30453716-30454365 (+) // 97.24 // p21.33
11722601_a_at	2.41195e-06	1.54302e-08	-1.326	-0.40708	1.326	down	39	ACAT2	acetyl-CoA acetyltransferase 2	0006629 // lipid metabolic process // inferred by curator /// 0008152 // metabolic process // inferred from electronic annotation	0005634 // nucleus // inferred from direct assay /// 0005654 // nucleoplasm // inferred from direct assay /// 0005730 // nucleolus // inferred from direct assay /// 0005737 // cytoplasm // inferred from direct assay /// 0070062 // extracellular exosome // inferred from direct assay	0003824 // catalytic activity // inferred from electronic annotation /// 0003985 // acetyl-CoA C-acetyltransferase activity // inferred from direct assay /// 0005515 // protein binding // inferred from physical interaction /// 0016740 // transferase activity // inferred from electronic annotation /// 0016746 // transferase activity, transferring acyl groups // inferred from electronic annotation …	P163-PWY // HumanCyc /// PWY-5177 // HumanCyc /// PWY-922 // HumanCyc	chr6:160182976-160200087 (+) // 97.99 // q25.3
11725345_at	2.41263e-06	1.55241e-08	-1.71903	-0.781595	1.71903	down	55170	PRMT6	protein arginine methyltransferase 6	0000122 // negative regulation of transcription from RNA polymerase II promoter // inferred from electronic annotation /// 0006281 // DNA repair // inferred from electronic annotation /// 0006284 // base-excision repair // traceable author statement /// 0006325 // chromatin organization // traceable author statement /// 0006351 // transcription, DNA-templated // inferred from electronic annotatio…	0005634 // nucleus // inferred from direct assay /// 0005654 // nucleoplasm // traceable author statement /// 0005829 // cytosol // not recorded	0003682 // chromatin binding // inferred from electronic annotation /// 0005515 // protein binding // inferred from physical interaction /// 0008168 // methyltransferase activity // inferred from electronic annotation /// 0008469 // histone-arginine N-methyltransferase activity // inferred from direct assay /// 0016274 // protein-arginine N-methyltransferase activity // inferred from electronic a…	---	chr1:107599266-107601914 (+) // 98.24 // p13.3
11736100_a_at	2.41263e-06	1.55322e-08	-1.50605	-0.59077	1.50605	down	2629 /// 2630	GBA /// GBAP1	glucosidase, beta, acid /// glucosidase, beta, acid pseudogene 1	0005975 // carbohydrate metabolic process // inferred from electronic annotation /// 0006629 // lipid metabolic process // inferred from electronic annotation /// 0006665 // sphingolipid metabolic process // traceable author statement /// 0006680 // glucosylceramide catabolic process // inferred from mutant phenotype /// 0006687 // glycosphingolipid metabolic process // traceable author statement…	0005764 // lysosome // inferred from electronic annotation /// 0005765 // lysosomal membrane // inferred from direct assay /// 0005765 // lysosomal membrane // inferred from sequence or structural similarity /// 0005765 // lysosomal membrane // traceable author statement /// 0016020 // membrane // inferred from electronic annotation /// 0043202 // lysosomal lumen // inferred from sequence or stru…	0004348 // glucosylceramidase activity // inferred from direct assay /// 0004348 // glucosylceramidase activity // inferred from mutant phenotype /// 0005102 // receptor binding // inferred from sequence or structural similarity /// 0005515 // protein binding // inferred from physical interaction /// 0016787 // hydrolase activity // inferred from electronic annotation /// 0016798 // hydrolase act…	---	chr1:155204242-155214653 (-) // 95.82 // q22
11754854_a_at	2.43108e-06	1.57003e-08	-1.46835	-0.554197	1.46835	down	80063	ATF7IP2	activating transcription factor 7 interacting protein 2	0006351 // transcription, DNA-templated // inferred from electronic annotation /// 0006355 // regulation of transcription, DNA-templated // inferred from electronic annotation	0005634 // nucleus // inferred from direct assay /// 0005654 // nucleoplasm // inferred from direct assay /// 0005730 // nucleolus // inferred from direct assay /// 0005737 // cytoplasm // inferred from direct assay	0005515 // protein binding // inferred from electronic annotation	---	chr16:10524464-10577494 (+) // 88.24 // p13.13
11758167_s_at	2.4519e-06	1.59189e-08	-1.50723	-0.5919	1.50723	down	57157	PHTF2	putative homeodomain transcription factor 2	0006351 // transcription, DNA-templated // inferred from electronic annotation /// 0006355 // regulation of transcription, DNA-templated // inferred from electronic annotation	0005634 // nucleus // inferred from electronic annotation /// 0005783 // endoplasmic reticulum // inferred from direct assay /// 0016020 // membrane // inferred from electronic annotation /// 0016021 // integral component of membrane // inferred from electronic annotation	0003677 // DNA binding // inferred from electronic annotation	---	chr7:77586195-77586821 (+) // 100.0 // q21.11
11718292_s_at	2.4519e-06	1.59423e-08	1.33994	0.422173	1.33994	up	3098	HK1	hexokinase 1	0001678 // cellular glucose homeostasis // not recorded /// 0005975 // carbohydrate metabolic process // traceable author statement /// 0006006 // glucose metabolic process // traceable author statement /// 0006096 // glycolytic process // traceable author statement /// 0008152 // metabolic process // inferred from electronic annotation /// 0008645 // hexose transport // traceable author statemen…	0005623 // cell // inferred from electronic annotation /// 0005739 // mitochondrion // inferred from direct assay /// 0005741 // mitochondrial outer membrane // inferred from electronic annotation /// 0005829 // cytosol // not recorded /// 0005829 // cytosol // traceable author statement /// 0005929 // cilium // inferred from electronic annotation /// 0016020 // membrane // inferred from electron…	0000166 // nucleotide binding // inferred from electronic annotation /// 0003824 // catalytic activity // inferred from electronic annotation /// 0004340 // glucokinase activity // not recorded /// 0004396 // hexokinase activity // traceable author statement /// 0005515 // protein binding // inferred from physical interaction /// 0005524 // ATP binding // inferred from electronic annotation /// 0…	Glycolysis_and_Gluconeogenesis // GenMAPP /// MANGDPMET-PWY // HumanCyc /// PWY-2722 // MetaCyc /// PWY-621 // HumanCyc /// PWY-621 // MetaCyc /// PWY66-400 // MetaCyc /// TREDEGLOW-PWY // MetaCyc	chr10:71029755-71161638 (+) // 97.8 // q22.1
11715670_a_at	2.4519e-06	1.59837e-08	1.2166	0.28285	1.2166	up	8519	IFITM1	interferon induced transmembrane protein 1	0001503 // ossification // inferred from electronic annotation /// 0002376 // immune system process // inferred from electronic annotation /// 0006955 // immune response // traceable author statement /// 0007166 // cell surface receptor signaling pathway // traceable author statement /// 0008285 // negative regulation of cell proliferation // inferred from mutant phenotype /// 0009607 // response…	0005622 // intracellular // traceable author statement /// 0005886 // plasma membrane // traceable author statement /// 0016020 // membrane // inferred from direct assay /// 0016021 // integral component of membrane // inferred from electronic annotation	0005057 // receptor signaling protein activity // traceable author statement /// 0005515 // protein binding // inferred from physical interaction	---	chr11:313526-315272 (+) // 87.08 // p15.5
11754151_a_at	2.4805e-06	1.62203e-08	-1.68195	-0.750138	1.68195	down	134957	STXBP5	syntaxin binding protein 5 (tomosyn)	0006810 // transport // inferred from electronic annotation /// 0006887 // exocytosis // inferred from electronic annotation /// 0010468 // regulation of gene expression // inferred from mutant phenotype /// 0015031 // protein transport // inferred from electronic annotation /// 0016192 // vesicle-mediated transport // inferred from electronic annotation /// 0017157 // regulation of exocytosis //…	0005737 // cytoplasm // inferred from direct assay /// 0005886 // plasma membrane // not recorded /// 0005892 // acetylcholine-gated channel complex // inferred from sequence or structural similarity /// 0008021 // synaptic vesicle // inferred from electronic annotation /// 0016020 // membrane // inferred from electronic annotation /// 0016021 // integral component of membrane // inferred from el…	0005096 // GTPase activator activity // not recorded /// 0005515 // protein binding // inferred from electronic annotation /// 0017075 // syntaxin-1 binding // inferred from sequence or structural similarity /// 0017137 // Rab GTPase binding // not recorded /// 0019905 // syntaxin binding // not recorded	---	chr6:147525507-147706866 (+) // 99.3 // q24.3
11729779_a_at	2.50345e-06	1.64211e-08	-1.29159	-0.369145	1.29159	down	1015	CDH17	cadherin 17, LI cadherin (liver-intestine)	0006810 // transport // non-traceable author statement /// 0006857 // oligopeptide transport // inferred from sequence or structural similarity /// 0007155 // cell adhesion // traceable author statement /// 0007156 // homophilic cell adhesion via plasma membrane adhesion molecules // inferred from sequence or structural similarity /// 0016339 // calcium-dependent cell-cell adhesion via plasma mem…	0005886 // plasma membrane // traceable author statement /// 0016020 // membrane // inferred from electronic annotation /// 0016021 // integral component of membrane // inferred from electronic annotation /// 0016323 // basolateral plasma membrane // inferred from direct assay	0005215 // transporter activity // traceable author statement /// 0005427 // proton-dependent oligopeptide secondary active transmembrane transporter activity // inferred from sequence or structural similarity /// 0005509 // calcium ion binding // inferred from electronic annotation /// 0005515 // protein binding // inferred from electronic annotation /// 0046872 // metal ion binding // inferred …	---	chr8:95139265-95229531 (-) // 90.8 // q22.1
11731503_at	2.56796e-06	1.68993e-08	-1.33794	-0.42001	1.33794	down	9882	TBC1D4	TBC1 domain family member 4	0016192 // vesicle-mediated transport // inferred from mutant phenotype /// 0031339 // negative regulation of vesicle fusion // inferred from electronic annotation /// 0032869 // cellular response to insulin stimulus // inferred from mutant phenotype /// 0043547 // positive regulation of GTPase activity // inferred from electronic annotation /// 0061024 // membrane organization // traceable autho…	0005737 // cytoplasm // inferred from direct assay /// 0030659 // cytoplasmic vesicle membrane // traceable author statement /// 0031988 // membrane-bounded vesicle // inferred from electronic annotation /// 0070062 // extracellular exosome // inferred from direct assay	0005096 // GTPase activator activity // inferred from electronic annotation /// 0005515 // protein binding // inferred from electronic annotation	---	chr13:75858808-76056250 (-) // 97.97 // q22.2
11743841_at	2.56796e-06	1.69481e-08	1.65699	0.728565	1.65699	up	257068	PLCXD2	phosphatidylinositol-specific phospholipase C, X domain containing 2	0007165 // signal transduction // inferred from electronic annotation /// 0016042 // lipid catabolic process // inferred from electronic annotation	---	0004871 // signal transducer activity // inferred from electronic annotation /// 0008081 // phosphoric diester hydrolase activity // inferred from electronic annotation	---	chr3:111393506-111445842 (+) // 99.37 // q13.2
11736215_x_at	2.57047e-06	1.70167e-08	-1.4015	-0.486967	1.4015	down	839	CASP6	caspase 6	0006508 // proteolysis // inferred from direct assay /// 0006915 // apoptotic process // traceable author statement /// 0006921 // cellular component disassembly involved in execution phase of apoptosis // traceable author statement /// 0012501 // programmed cell death // traceable author statement /// 0030855 // epithelial cell differentiation // inferred from expression pattern /// 0097194 // e…	0005654 // nucleoplasm // inferred from direct assay /// 0005654 // nucleoplasm // traceable author statement /// 0005737 // cytoplasm // inferred from direct assay /// 0005829 // cytosol // inferred from direct assay /// 0005829 // cytosol // traceable author statement	0004175 // endopeptidase activity // inferred from electronic annotation /// 0004197 // cysteine-type endopeptidase activity // traceable author statement /// 0005515 // protein binding // inferred from physical interaction /// 0008233 // peptidase activity // inferred from electronic annotation /// 0008234 // cysteine-type peptidase activity // traceable author statement /// 0016787 // hydrolase…	Apoptosis // GenMAPP /// Apoptosis_GenMAPP // GenMAPP /// Apoptosis_KEGG // GenMAPP	chr4:110609775-110624629 (-) // 77.77 // q25
11741224_s_at	2.58967e-06	1.71963e-08	-1.39837	-0.483747	1.39837	down	1983	EIF5	eukaryotic translation initiation factor 5	0006412 // translation // traceable author statement /// 0006413 // translational initiation // non-traceable author statement /// 0006413 // translational initiation // traceable author statement /// 0006446 // regulation of translational initiation // inferred from direct assay /// 0010467 // gene expression // traceable author statement /// 0044267 // cellular protein metabolic process // trac…	0005634 // nucleus // inferred from direct assay /// 0005737 // cytoplasm // inferred from direct assay /// 0005829 // cytosol // non-traceable author statement /// 0005829 // cytosol // traceable author statement /// 0005886 // plasma membrane // inferred from direct assay	0000166 // nucleotide binding // inferred from electronic annotation /// 0003743 // translation initiation factor activity // non-traceable author statement /// 0003924 // GTPase activity // traceable author statement /// 0005488 // binding // inferred from electronic annotation /// 0005515 // protein binding // inferred from physical interaction /// 0005525 // GTP binding // inferred from electr…	Translation_Factors // GenMAPP	chr14:103801197-103811359 (+) // 90.55 // q32.32
11743444_s_at	2.59256e-06	1.7268e-08	1.35132	0.434372	1.35132	up	388	RHOB	ras homolog family member B	0000910 // cytokinesis // inferred from mutant phenotype /// 0001525 // angiogenesis // inferred from electronic annotation /// 0006810 // transport // inferred from electronic annotation /// 0006886 // intracellular protein transport // inferred from electronic annotation /// 0006915 // apoptotic process // traceable author statement /// 0006927 // transformed cell apoptotic process // inferred …	0005622 // intracellular // inferred from electronic annotation /// 0005634 // nucleus // inferred from sequence or structural similarity /// 0005768 // endosome // inferred from electronic annotation /// 0005769 // early endosome // inferred from electronic annotation /// 0005770 // late endosome // inferred from electronic annotation /// 0005829 // cytosol // traceable author statement /// 0005…	0000166 // nucleotide binding // inferred from electronic annotation /// 0003924 // GTPase activity // traceable author statement /// 0005515 // protein binding // inferred from physical interaction /// 0005525 // GTP binding // traceable author statement /// 0019003 // GDP binding // inferred from electronic annotation	---	chr2:20646831-20649206 (+) // 95.54 // p24.1
11717371_a_at	2.59597e-06	1.73432e-08	-1.32258	-0.403358	1.32258	down	9557	CHD1L	chromodomain helicase DNA binding protein 1-like	0006281 // DNA repair // traceable author statement /// 0006289 // nucleotide-excision repair // traceable author statement /// 0006338 // chromatin remodeling // inferred from direct assay /// 0006974 // cellular response to DNA damage stimulus // inferred from direct assay /// 0008152 // metabolic process // inferred from electronic annotation /// 0032508 // DNA duplex unwinding // traceable au…	0005634 // nucleus // inferred from direct assay /// 0005654 // nucleoplasm // inferred from direct assay /// 0005654 // nucleoplasm // traceable author statement /// 0005737 // cytoplasm // inferred from direct assay /// 0005886 // plasma membrane // inferred from direct assay	0000166 // nucleotide binding // inferred from direct assay /// 0003676 // nucleic acid binding // inferred from electronic annotation /// 0003677 // DNA binding // inferred from electronic annotation /// 0004003 // ATP-dependent DNA helicase activity // traceable author statement /// 0004386 // helicase activity // inferred from electronic annotation /// 0005515 // protein binding // inferred fr…	---	chr1:146714295-146767443 (+) // 98.17 // q21.1
11740134_a_at	2.60224e-06	1.74378e-08	1.25645	0.32935	1.25645	up	800	CALD1	caldesmon 1	0006928 // movement of cell or subcellular component // traceable author statement /// 0006936 // muscle contraction // traceable author statement	0005737 // cytoplasm // inferred from electronic annotation /// 0005829 // cytosol // traceable author statement /// 0005856 // cytoskeleton // traceable author statement /// 0005886 // plasma membrane // inferred from direct assay /// 0015629 // actin cytoskeleton // inferred from direct assay /// 0016020 // membrane // inferred from electronic annotation /// 0016021 // integral component of mem…	0003779 // actin binding // inferred from electronic annotation /// 0005515 // protein binding // inferred from physical interaction /// 0005516 // calmodulin binding // inferred from electronic annotation /// 0005523 // tropomyosin binding // traceable author statement /// 0017022 // myosin binding // inferred from electronic annotation	---	chr7:134576158-134655470 (+) // 95.08 // q33
11751343_x_at	2.60584e-06	1.75147e-08	1.74361	0.802075	1.74361	up	10397	NDRG1	N-myc downstream regulated 1	0008285 // negative regulation of cell proliferation // inferred from electronic annotation /// 0010038 // response to metal ion // traceable author statement /// 0030330 // DNA damage response, signal transduction by p53 class mediator // inferred from expression pattern /// 0032287 // peripheral nervous system myelin maintenance // inferred from electronic annotation /// 0042127 // regulation o…	0005634 // nucleus // inferred from direct assay /// 0005737 // cytoplasm // inferred from direct assay /// 0005813 // centrosome // inferred from direct assay /// 0005815 // microtubule organizing center // inferred from electronic annotation /// 0005829 // cytosol // inferred from electronic annotation /// 0005856 // cytoskeleton // inferred from electronic annotation /// 0005874 // microtubule…	0005515 // protein binding // inferred from physical interaction /// 0008017 // microtubule binding // inferred from direct assay /// 0017137 // Rab GTPase binding // inferred from direct assay /// 0043015 // gamma-tubulin binding // inferred from direct assay /// 0045296 // cadherin binding // inferred from direct assay	---	chr8:134250940-134309495 (-) // 99.93 // q24.22
11717638_at	2.62815e-06	1.77588e-08	1.33857	0.420692	1.33857	up	6385	SDC4	syndecan 4	0001523 // retinoid metabolic process // traceable author statement /// 0001657 // ureteric bud development // inferred from electronic annotation /// 0001843 // neural tube closure // inferred from electronic annotation /// 0005975 // carbohydrate metabolic process // traceable author statement /// 0006024 // glycosaminoglycan biosynthetic process // traceable author statement /// 0006027 // gly…	0005576 // extracellular region // inferred from electronic annotation /// 0005796 // Golgi lumen // traceable author statement /// 0005886 // plasma membrane // traceable author statement /// 0005887 // integral component of plasma membrane // non-traceable author statement /// 0005925 // focal adhesion // inferred from electronic annotation /// 0009986 // cell surface // not recorded /// 001602…	0001968 // fibronectin binding // inferred from electronic annotation /// 0005080 // protein kinase C binding // inferred from electronic annotation /// 0005515 // protein binding // inferred from physical interaction /// 0070053 // thrombospondin receptor activity // inferred from mutant phenotype	---	chr20:43953927-43977064 (-) // 89.15 // q13.12
11723824_s_at	2.62815e-06	1.78158e-08	-1.51329	-0.597685	1.51329	down	55930	MYO5C	myosin VC	0008152 // metabolic process // inferred from electronic annotation	0016459 // myosin complex // inferred from electronic annotation /// 0070062 // extracellular exosome // inferred from direct assay	0000166 // nucleotide binding // inferred from electronic annotation /// 0003774 // motor activity // inferred from electronic annotation /// 0003779 // actin binding // inferred from electronic annotation /// 0005515 // protein binding // inferred from electronic annotation /// 0005516 // calmodulin binding // inferred from electronic annotation /// 0005524 // ATP binding // inferred from electr…	---	chr15:52484518-52587995 (-) // 94.4 // q21.2
11755966_x_at	2.62815e-06	1.78243e-08	1.25119	0.323305	1.25119	up	3106	HLA-B	major histocompatibility complex, class I, B	0001916 // positive regulation of T cell mediated cytotoxicity // inferred from direct assay /// 0002376 // immune system process // inferred from electronic annotation /// 0002474 // antigen processing and presentation of peptide antigen via MHC class I // inferred from electronic annotation /// 0002474 // antigen processing and presentation of peptide antigen via MHC class I // traceable author…	0000139 // Golgi membrane // traceable author statement /// 0005783 // endoplasmic reticulum // inferred from direct assay /// 0005783 // endoplasmic reticulum // inferred from sequence or structural similarity /// 0005794 // Golgi apparatus // inferred from direct assay /// 0005794 // Golgi apparatus // inferred from sequence or structural similarity /// 0005886 // plasma membrane // not recorde…	0005102 // receptor binding // inferred from physical interaction /// 0005515 // protein binding // inferred from electronic annotation /// 0042605 // peptide antigen binding // inferred from direct assay /// 0042605 // peptide antigen binding // inferred from sequence or structural similarity /// 0046977 // TAP binding // inferred from direct assay /// 0051087 // chaperone binding // inferred fr…	Proteasome_Degradation // GenMAPP	chr6:31321643-31324955 (-) // 91.71 // p21.33
11725932_a_at	2.63899e-06	1.79512e-08	1.32431	0.40524	1.32431	up	3309	HSPA5	heat shock protein family A (Hsp70) member 5	0002576 // platelet degranulation // traceable author statement /// 0006983 // ER overload response // inferred from electronic annotation /// 0006987 // activation of signaling protein activity involved in unfolded protein response // inferred from electronic annotation /// 0007596 // blood coagulation // traceable author statement /// 0021589 // cerebellum structural organization // inferred fr…	0005634 // nucleus // inferred from direct assay /// 0005634 // nucleus // inferred from mutant phenotype /// 0005737 // cytoplasm // inferred from electronic annotation /// 0005739 // mitochondrion // inferred from electronic annotation /// 0005783 // endoplasmic reticulum // inferred from direct assay /// 0005783 // endoplasmic reticulum // inferred from mutant phenotype /// 0005783 // endoplas…	0000166 // nucleotide binding // inferred from electronic annotation /// 0001948 // glycoprotein binding // inferred from physical interaction /// 0005509 // calcium ion binding // traceable author statement /// 0005515 // protein binding // inferred from physical interaction /// 0005524 // ATP binding // inferred from electronic annotation /// 0016887 // ATPase activity // inferred from direct a…	---	chr9:127997128-128003771 (-) // 89.6 // q33.3
11758241_s_at	2.64006e-06	1.8012e-08	-1.25532	-0.328053	1.25532	down	1781	DYNC1I2	dynein, cytoplasmic 1, intermediate chain 2	0000086 // G2/M transition of mitotic cell cycle // traceable author statement /// 0000278 // mitotic cell cycle // traceable author statement /// 0006810 // transport // inferred from electronic annotation /// 0006996 // organelle organization // traceable author statement /// 0007018 // microtubule-based movement // non-traceable author statement /// 0008152 // metabolic process // inferred fro…	0005737 // cytoplasm // non-traceable author statement /// 0005813 // centrosome // inferred from direct assay /// 0005829 // cytosol // traceable author statement /// 0005856 // cytoskeleton // inferred from electronic annotation /// 0005868 // cytoplasmic dynein complex // inferred from electronic annotation /// 0005874 // microtubule // inferred from direct assay /// 0030286 // dynein complex …	0003774 // motor activity // inferred from electronic annotation /// 0003777 // microtubule motor activity // non-traceable author statement /// 0005515 // protein binding // inferred from physical interaction	---	chr10:52026566-52027108 (+) // 51.38 // q11.23
11718399_s_at	2.65319e-06	1.81553e-08	1.4563	0.542305	1.4563	up	7052	TGM2	transglutaminase 2	0001974 // blood vessel remodeling // inferred from electronic annotation /// 0007200 // phospholipase C-activating G-protein coupled receptor signaling pathway // inferred from electronic annotation /// 0018149 // peptide cross-linking // inferred from electronic annotation /// 0018153 // isopeptide cross-linking via N6-(L-isoglutamyl)-L-lysine // inferred from electronic annotation /// 0032471 …	0005737 // cytoplasm // inferred from electronic annotation /// 0005739 // mitochondrion // inferred from direct assay /// 0005783 // endoplasmic reticulum // inferred from mutant phenotype /// 0005829 // cytosol // inferred from direct assay /// 0005886 // plasma membrane // inferred from electronic annotation /// 0005925 // focal adhesion // inferred from direct assay /// 0031226 // intrinsic c…	0003810 // protein-glutamine gamma-glutamyltransferase activity // inferred from mutant phenotype /// 0003810 // protein-glutamine gamma-glutamyltransferase activity // inferred from sequence or structural similarity /// 0005515 // protein binding // inferred from physical interaction /// 0005525 // GTP binding // inferred from electronic annotation /// 0016740 // transferase activity // inferred…	---	chr20:36756862-36793676 (-) // 87.32 // q11.23
11750541_a_at	2.66027e-06	1.82576e-08	1.31614	0.39631	1.31614	up	6744	SSFA2	sperm specific antigen 2	---	0005634 // nucleus // inferred from direct assay /// 0005654 // nucleoplasm // inferred from direct assay /// 0005737 // cytoplasm // inferred from direct assay /// 0005886 // plasma membrane // inferred from direct assay	0003779 // actin binding // inferred from electronic annotation /// 0005102 // receptor binding // inferred from electronic annotation /// 0051015 // actin filament binding // inferred from direct assay	---	chr2:182756922-182794511 (+) // 99.1 // q31.3
11721305_a_at	2.69158e-06	1.85523e-08	1.38614	0.471073	1.38614	up	22822	PHLDA1	pleckstrin homology-like domain, family A, member 1	0006915 // apoptotic process // inferred from electronic annotation /// 0021879 // forebrain neuron differentiation // inferred from electronic annotation /// 0043065 // positive regulation of apoptotic process // inferred from electronic annotation /// 0045210 // FasL biosynthetic process // inferred from electronic annotation	0005634 // nucleus // inferred from electronic annotation /// 0005654 // nucleoplasm // inferred from direct assay /// 0005730 // nucleolus // inferred from electronic annotation /// 0005737 // cytoplasm // inferred from electronic annotation /// 0005886 // plasma membrane // inferred from direct assay /// 0016020 // membrane // inferred from electronic annotation /// 0030659 // cytoplasmic vesic…	0005515 // protein binding // inferred from physical interaction	---	chr12:76419226-76425681 (-) // 86.13 // q21.2
11754328_a_at	2.69158e-06	1.8603e-08	-1.5033	-0.588138	1.5033	down	54872	PIGG	phosphatidylinositol glycan anchor biosynthesis class G	0006501 // C-terminal protein lipidation // traceable author statement /// 0006506 // GPI anchor biosynthetic process // inferred from direct assay /// 0008152 // metabolic process // inferred from electronic annotation /// 0016254 // preassembly of GPI anchor in ER membrane // traceable author statement /// 0043687 // post-translational protein modification // traceable author statement /// 0044…	0005783 // endoplasmic reticulum // inferred from direct assay /// 0005789 // endoplasmic reticulum membrane // traceable author statement /// 0016020 // membrane // inferred from direct assay /// 0016021 // integral component of membrane // inferred from electronic annotation /// 0030176 // integral component of endoplasmic reticulum membrane // not recorded	0003824 // catalytic activity // inferred from electronic annotation /// 0016740 // transferase activity // inferred from electronic annotation /// 0016780 // phosphotransferase activity, for other substituted phosphate groups // traceable author statement /// 0051267 // CP2 mannose-ethanolamine phosphotransferase activity // inferred from direct assay	---	chr4:492998-533318 (+) // 98.66 // p16.3
11751099_x_at	2.69158e-06	1.8675e-08	-1.46223	-0.548168	1.46223	down	2630	GBAP1	glucosidase, beta, acid pseudogene 1	0005975 // carbohydrate metabolic process // inferred from electronic annotation /// 0006629 // lipid metabolic process // inferred from electronic annotation /// 0006665 // sphingolipid metabolic process // inferred from electronic annotation /// 0006665 // sphingolipid metabolic process // traceable author statement /// 0006680 // glucosylceramide catabolic process // inferred from mutant pheno…	0005764 // lysosome // inferred from electronic annotation /// 0005765 // lysosomal membrane // inferred from direct assay /// 0005765 // lysosomal membrane // inferred from electronic annotation /// 0005765 // lysosomal membrane // inferred from sequence or structural similarity /// 0005765 // lysosomal membrane // traceable author statement /// 0016020 // membrane // inferred from electronic an…	0004348 // glucosylceramidase activity // inferred from direct assay /// 0004348 // glucosylceramidase activity // inferred from electronic annotation /// 0004348 // glucosylceramidase activity // inferred from mutant phenotype /// 0005102 // receptor binding // inferred from electronic annotation /// 0005102 // receptor binding // inferred from sequence or structural similarity /// 0005515 // pr…	---	chr1:155183938-155197214 (-) // 94.86 // q22
11721774_a_at	2.69158e-06	1.87222e-08	1.57088	0.651572	1.57088	up	444	ASPH	aspartate beta-hydroxylase	0005513 // detection of calcium ion // traceable author statement /// 0006936 // muscle contraction // traceable author statement /// 0007389 // pattern specification process // inferred from electronic annotation /// 0008285 // negative regulation of cell proliferation // inferred from electronic annotation /// 0010524 // positive regulation of calcium ion transport into cytosol // inferred from…	0005737 // cytoplasm // inferred from electronic annotation /// 0005783 // endoplasmic reticulum // inferred from direct assay /// 0005789 // endoplasmic reticulum membrane // non-traceable author statement /// 0005789 // endoplasmic reticulum membrane // traceable author statement /// 0005886 // plasma membrane // inferred from direct assay /// 0014701 // junctional sarcoplasmic reticulum membra…	0004597 // peptide-aspartate beta-dioxygenase activity // inferred from electronic annotation /// 0005198 // structural molecule activity // traceable author statement /// 0005509 // calcium ion binding // inferred from direct assay /// 0005509 // calcium ion binding // non-traceable author statement /// 0005515 // protein binding // inferred from physical interaction /// 0008307 // structural co…	---	chr8:62537095-62627199 (-) // 96.86 // q12.3
11728447_at	2.69158e-06	1.87449e-08	-1.43051	-0.516525	1.43051	down	25788	RAD54B	RAD54 homolog B (S. cerevisiae)	0000724 // double-strand break repair via homologous recombination // inferred from direct assay /// 0006281 // DNA repair // inferred from electronic annotation /// 0006312 // mitotic recombination // traceable author statement /// 0006351 // transcription, DNA-templated // inferred from electronic annotation /// 0006355 // regulation of transcription, DNA-templated // inferred from electronic a…	0005634 // nucleus // inferred from electronic annotation /// 0005654 // nucleoplasm // inferred from direct assay /// 0005737 // cytoplasm // inferred from direct assay	0000166 // nucleotide binding // inferred from electronic annotation /// 0003677 // DNA binding // inferred from electronic annotation /// 0003678 // DNA helicase activity // traceable author statement /// 0003724 // RNA helicase activity // traceable author statement /// 0004386 // helicase activity // inferred from electronic annotation /// 0005515 // protein binding // inferred from physical i…	---	chr8:95384188-95487343 (-) // 99.42 // q22.1
11760849_a_at	2.70284e-06	1.88781e-08	1.46726	0.553122	1.46726	up	10207	INADL	InaD-like (Drosophila)	0034329 // cell junction assembly // traceable author statement /// 0035556 // intracellular signal transduction // non-traceable author statement /// 0045216 // cell-cell junction organization // traceable author statement /// 0070830 // bicellular tight junction assembly // traceable author statement	0005737 // cytoplasm // inferred from electronic annotation /// 0005886 // plasma membrane // traceable author statement /// 0005923 // bicellular tight junction // inferred from direct assay /// 0016020 // membrane // inferred from electronic annotation /// 0016324 // apical plasma membrane // inferred from electronic annotation /// 0030054 // cell junction // inferred from electronic annotation…	0005515 // protein binding // inferred from physical interaction	---	chr1:62417983-62583067 (+) // 93.4 // p31.3
11728769_at	2.71345e-06	1.90071e-08	-1.52019	-0.60425	1.52019	down	256435	ST6GALNAC3	ST6 (alpha-N-acetyl-neuraminyl-2,3-beta-galactosyl-1,3)-N-acetylgalactosaminide alpha-2,6-sialyltransferase 3	0001574 // ganglioside biosynthetic process // not recorded /// 0006486 // protein glycosylation // inferred from electronic annotation /// 0006488 // dolichol-linked oligosaccharide biosynthetic process // traceable author statement /// 0006677 // glycosylceramide metabolic process // inferred from direct assay /// 0006687 // glycosphingolipid metabolic process // inferred from direct assay /// …	0000139 // Golgi membrane // traceable author statement /// 0005794 // Golgi apparatus // inferred from electronic annotation /// 0016020 // membrane // inferred from electronic annotation /// 0016021 // integral component of membrane // inferred from electronic annotation	0001665 // alpha-N-acetylgalactosaminide alpha-2,6-sialyltransferase activity // not recorded /// 0008373 // sialyltransferase activity // inferred from direct assay /// 0016740 // transferase activity // inferred from electronic annotation /// 0016757 // transferase activity, transferring glycosyl groups // inferred from electronic annotation	---	chr1:76540386-77100283 (+) // 93.7 // p31.1
11715885_at	2.73803e-06	1.92676e-08	-1.45922	-0.545195	1.45922	down	55069	TMEM248	transmembrane protein 248	---	0016020 // membrane // inferred from electronic annotation /// 0016021 // integral component of membrane // inferred from electronic annotation	0005515 // protein binding // inferred from physical interaction	---	chr7:66386205-66423538 (+) // 89.57 // q11.21
11718583_a_at	2.73803e-06	1.92901e-08	-1.34238	-0.424795	1.34238	down	10330	CNPY2	canopy FGF signaling regulator 2	0010629 // negative regulation of gene expression // inferred from sequence or structural similarity /// 0010988 // regulation of low-density lipoprotein particle clearance // inferred from sequence or structural similarity /// 0045716 // positive regulation of low-density lipoprotein particle receptor biosynthetic process // inferred from sequence or structural similarity	0005783 // endoplasmic reticulum // inferred from electronic annotation /// 0005887 // integral component of plasma membrane // traceable author statement	0005515 // protein binding // inferred from physical interaction	---	chr12:56703974-56710132 (-) // 99.59 // q13.3
11720460_x_at	2.73978e-06	1.93579e-08	1.25614	0.329	1.25614	up	50848	F11R	F11 receptor	0001817 // regulation of cytokine production // inferred from electronic annotation /// 0006954 // inflammatory response // traceable author statement /// 0007155 // cell adhesion // inferred from electronic annotation /// 0007179 // transforming growth factor beta receptor signaling pathway // traceable author statement /// 0007596 // blood coagulation // traceable author statement /// 0009314 /…	0005886 // plasma membrane // inferred from direct assay /// 0005886 // plasma membrane // traceable author statement /// 0005911 // cell-cell junction // traceable author statement /// 0005923 // bicellular tight junction // inferred from direct assay /// 0015630 // microtubule cytoskeleton // inferred from direct assay /// 0016020 // membrane // inferred from electronic annotation /// 0016021 /…	0001618 // virus receptor activity // inferred from electronic annotation /// 0005515 // protein binding // inferred from physical interaction /// 0030165 // PDZ domain binding // inferred from physical interaction	---	chr1:160965000-160991133 (-) // 80.65 // q23.3
11754951_a_at	2.74282e-06	1.94349e-08	1.31369	0.39362	1.31369	up	135112	NCOA7	nuclear receptor coactivator 7	0006351 // transcription, DNA-templated // inferred from electronic annotation /// 0006355 // regulation of transcription, DNA-templated // inferred from electronic annotation /// 0045944 // positive regulation of transcription from RNA polymerase II promoter // inferred from direct assay	0005622 // intracellular // inferred from direct assay /// 0005634 // nucleus // inferred from electronic annotation	0005515 // protein binding // inferred from physical interaction /// 0030374 // ligand-dependent nuclear receptor transcription coactivator activity // inferred from direct assay /// 0035257 // nuclear hormone receptor binding // inferred from direct assay	---	chr6:126240369-126252254 (+) // 86.49 // q22.32
11715483_s_at	2.7518e-06	1.95542e-08	1.29393	0.371765	1.29393	up	4170	MCL1	myeloid cell leukemia 1	0001709 // cell fate determination // non-traceable author statement /// 0006915 // apoptotic process // inferred from electronic annotation /// 0007275 // multicellular organismal development // inferred from electronic annotation /// 0008630 // intrinsic apoptotic signaling pathway in response to DNA damage // not recorded /// 0008637 // apoptotic mitochondrial changes // inferred from electron…	0005622 // intracellular // --- /// 0005634 // nucleus // inferred from direct assay /// 0005654 // nucleoplasm // inferred from electronic annotation /// 0005737 // cytoplasm // traceable author statement /// 0005739 // mitochondrion // inferred from direct assay /// 0005741 // mitochondrial outer membrane // traceable author statement /// 0005759 // mitochondrial matrix // inferred from electro…	0005515 // protein binding // inferred from physical interaction /// 0015266 // protein channel activity // traceable author statement /// 0042803 // protein homodimerization activity // not recorded /// 0046982 // protein heterodimerization activity // inferred from physical interaction /// 0051434 // BH3 domain binding // inferred from physical interaction	Apoptosis_GenMAPP // GenMAPP /// Apoptosis_KEGG // GenMAPP	chr1:150547031-150552247 (-) // 91.97 // q21.3
11724510_at	2.75537e-06	1.96354e-08	1.65899	0.730305	1.65899	up	5366	PMAIP1	phorbol-12-myristate-13-acetate-induced protein 1	0001836 // release of cytochrome c from mitochondria // inferred from electronic annotation /// 0006915 // apoptotic process // inferred from mutant phenotype /// 0006915 // apoptotic process // traceable author statement /// 0006919 // activation of cysteine-type endopeptidase activity involved in apoptotic process // inferred from electronic annotation /// 0006974 // cellular response to DNA da…	0005634 // nucleus // inferred from direct assay /// 0005739 // mitochondrion // inferred from direct assay /// 0005741 // mitochondrial outer membrane // traceable author statement /// 0005829 // cytosol // inferred from direct assay /// 0005829 // cytosol // traceable author statement	0005515 // protein binding // inferred from physical interaction	---	chr18:57567179-57571537 (+) // 98.48 // q21.32
[truncated: 49,043 more rows]
